# Supplementary material
Source: publisher site journal article supplement (https://www.spandidos-publications.com/3124/downloadSupplementary)
Supplement: Supplementary file 1 [file downloadSupplementary]

## Sheet: Table S5
Table SV. Associations between differentially expressed long non-coding RNAs and potential targets predicted according to a trans-acting pattern.
lncRNA_id	Trans_Target_mRNA	Trans_Target_gene	gene_name	Trans_Evalue
NONRATT029060.2	ENSRNOT00000091577	ENSRNOG00000002182	2020-09-11	-83
NONRATT029310.2	ENSRNOT00000079643	ENSRNOG00000052273	3110040N11Rik	-80
NONRATT024782.2	ENSRNOT00000079643	ENSRNOG00000052273	3110040N11Rik	-80.6
NONRATT028716.2	ENSRNOT00000089393	ENSRNOG00000052023	AABR07002885.1	-82.3
NONRATT026181.2	ENSRNOT00000089393	ENSRNOG00000052023	AABR07002885.1	-81.2
NONRATT018825.2	ENSRNOT00000089393	ENSRNOG00000052023	AABR07002885.1	-75.8
NONRATT017960.2	ENSRNOT00000089393	ENSRNOG00000052023	AABR07002885.1	-83
NONRATT014517.2	ENSRNOT00000089393	ENSRNOG00000052023	AABR07002885.1	-80.3
NONRATT013372.2	ENSRNOT00000089393	ENSRNOG00000052023	AABR07002885.1	-83
NONRATT012710.2	ENSRNOT00000089393	ENSRNOG00000052023	AABR07002885.1	-78.7
NONRATT011845.2	ENSRNOT00000089393	ENSRNOG00000052023	AABR07002885.1	-81.9
NONRATT006496.2	ENSRNOT00000089393	ENSRNOG00000052023	AABR07002885.1	-80.2
NONRATT005891.2	ENSRNOT00000089393	ENSRNOG00000052023	AABR07002885.1	-80.1
NONRATT001051.2	ENSRNOT00000089393	ENSRNOG00000052023	AABR07002885.1	-80.2
NONRATT030282.2	ENSRNOT00000091767	ENSRNOG00000058371	AABR07013154.2	-75.9
NONRATT027796.2	ENSRNOT00000091767	ENSRNOG00000058371	AABR07013154.2	-84.6
NONRATT021570.2	ENSRNOT00000091767	ENSRNOG00000058371	AABR07013154.2	-83
NONRATT017510.2	ENSRNOT00000091767	ENSRNOG00000058371	AABR07013154.2	-73.5
NONRATT028716.2	ENSRNOT00000090457	ENSRNOG00000058793	AABR07027511.1	-89.8
NONRATT026181.2	ENSRNOT00000090457	ENSRNOG00000058793	AABR07027511.1	-94.5
NONRATT021076.2	ENSRNOT00000090457	ENSRNOG00000058793	AABR07027511.1	-84.8
NONRATT018825.2	ENSRNOT00000090457	ENSRNOG00000058793	AABR07027511.1	-92
NONRATT017960.2	ENSRNOT00000090457	ENSRNOG00000058793	AABR07027511.1	-88.1
NONRATT014517.2	ENSRNOT00000090457	ENSRNOG00000058793	AABR07027511.1	-88.6
NONRATT013372.2	ENSRNOT00000090457	ENSRNOG00000058793	AABR07027511.1	-93.9
NONRATT012710.2	ENSRNOT00000090457	ENSRNOG00000058793	AABR07027511.1	-93.8
NONRATT011845.2	ENSRNOT00000090457	ENSRNOG00000058793	AABR07027511.1	-92.5
NONRATT006496.2	ENSRNOT00000090457	ENSRNOG00000058793	AABR07027511.1	-96.4
NONRATT005891.2	ENSRNOT00000090457	ENSRNOG00000058793	AABR07027511.1	-86
NONRATT001051.2	ENSRNOT00000090457	ENSRNOG00000058793	AABR07027511.1	-89.8
ENSRNOT00000089552	ENSRNOT00000090457	ENSRNOG00000058793	AABR07027511.1	-96.4
ENSRNOT00000089288	ENSRNOT00000090457	ENSRNOG00000058793	AABR07027511.1	-82.9
NONRATT028716.2	ENSRNOT00000091323	ENSRNOG00000057141	AABR07035641.1	-90
NONRATT026181.2	ENSRNOT00000091323	ENSRNOG00000057141	AABR07035641.1	-89.4
NONRATT021076.2	ENSRNOT00000091323	ENSRNOG00000057141	AABR07035641.1	-88.1
NONRATT018825.2	ENSRNOT00000091323	ENSRNOG00000057141	AABR07035641.1	-80.9
NONRATT017960.2	ENSRNOT00000091323	ENSRNOG00000057141	AABR07035641.1	-86.1
NONRATT014517.2	ENSRNOT00000091323	ENSRNOG00000057141	AABR07035641.1	-90
NONRATT013372.2	ENSRNOT00000091323	ENSRNOG00000057141	AABR07035641.1	-82.3
NONRATT012710.2	ENSRNOT00000091323	ENSRNOG00000057141	AABR07035641.1	-82.7
NONRATT011845.2	ENSRNOT00000091323	ENSRNOG00000057141	AABR07035641.1	-79.2
NONRATT006496.2	ENSRNOT00000091323	ENSRNOG00000057141	AABR07035641.1	-85.3
NONRATT005891.2	ENSRNOT00000091323	ENSRNOG00000057141	AABR07035641.1	-87.8
NONRATT001051.2	ENSRNOT00000091323	ENSRNOG00000057141	AABR07035641.1	-90
ENSRNOT00000089288	ENSRNOT00000091323	ENSRNOG00000057141	AABR07035641.1	-72
NONRATT025772.2	ENSRNOT00000072653	ENSRNOG00000050059	AABR07035776.1	-81.4
NONRATT023910.2	ENSRNOT00000072653	ENSRNOG00000050059	AABR07035776.1	-82
NONRATT023587.2	ENSRNOT00000072653	ENSRNOG00000050059	AABR07035776.1	-86.1
NONRATT017977.2	ENSRNOT00000072653	ENSRNOG00000050059	AABR07035776.1	-79.5
NONRATT014240.2	ENSRNOT00000072653	ENSRNOG00000050059	AABR07035776.1	-88.2
NONRATT008688.2	ENSRNOT00000072653	ENSRNOG00000050059	AABR07035776.1	-79.3
NONRATT004661.2	ENSRNOT00000072653	ENSRNOG00000050059	AABR07035776.1	-84.1
NONRATT000606.2	ENSRNOT00000072653	ENSRNOG00000050059	AABR07035776.1	-88.2
NONRATT007873.2	ENSRNOT00000084789	ENSRNOG00000055795	AABR07035832.1	-95.6
NONRATT027796.2	ENSRNOT00000090671	ENSRNOG00000057227	AABR07036732.1	-78.2
NONRATT021570.2	ENSRNOT00000090671	ENSRNOG00000057227	AABR07036732.1	-75.8
NONRATT007757.2	ENSRNOT00000079257	ENSRNOG00000053115	AABR07042904.1	-83.9
NONRATT028716.2	ENSRNOT00000081542	ENSRNOG00000059312	AABR07046231.1	-83.5
NONRATT026181.2	ENSRNOT00000081542	ENSRNOG00000059312	AABR07046231.1	-86
NONRATT018825.2	ENSRNOT00000081542	ENSRNOG00000059312	AABR07046231.1	-78
NONRATT017960.2	ENSRNOT00000081542	ENSRNOG00000059312	AABR07046231.1	-84.7
NONRATT014517.2	ENSRNOT00000081542	ENSRNOG00000059312	AABR07046231.1	-82.7
NONRATT013372.2	ENSRNOT00000081542	ENSRNOG00000059312	AABR07046231.1	-83.4
NONRATT012710.2	ENSRNOT00000081542	ENSRNOG00000059312	AABR07046231.1	-82.1
NONRATT011845.2	ENSRNOT00000081542	ENSRNOG00000059312	AABR07046231.1	-83.5
NONRATT006496.2	ENSRNOT00000081542	ENSRNOG00000059312	AABR07046231.1	-78.1
NONRATT005891.2	ENSRNOT00000081542	ENSRNOG00000059312	AABR07046231.1	-82.3
NONRATT001051.2	ENSRNOT00000081542	ENSRNOG00000059312	AABR07046231.1	-81.6
NONRATT025772.2	ENSRNOT00000083144	ENSRNOG00000060052	AABR07063516.1	-88.1
NONRATT023910.2	ENSRNOT00000083144	ENSRNOG00000060052	AABR07063516.1	-96.2
NONRATT023587.2	ENSRNOT00000083144	ENSRNOG00000060052	AABR07063516.1	-88.7
NONRATT017977.2	ENSRNOT00000083144	ENSRNOG00000060052	AABR07063516.1	-94
NONRATT014240.2	ENSRNOT00000083144	ENSRNOG00000060052	AABR07063516.1	-91.1
NONRATT008688.2	ENSRNOT00000083144	ENSRNOG00000060052	AABR07063516.1	-92.3
NONRATT004661.2	ENSRNOT00000083144	ENSRNOG00000060052	AABR07063516.1	-83.5
NONRATT000606.2	ENSRNOT00000083144	ENSRNOG00000060052	AABR07063516.1	-91.1
NONRATT010218.2	ENSRNOT00000027369	ENSRNOG00000020086	Aar2	-75.4
NONRATT027796.2	ENSRNOT00000031549	ENSRNOG00000025808	Aars2	-84.3
NONRATT025772.2	ENSRNOT00000031549	ENSRNOG00000025808	Aars2	-83.6
NONRATT023910.2	ENSRNOT00000031549	ENSRNOG00000025808	Aars2	-89.7
NONRATT023587.2	ENSRNOT00000031549	ENSRNOG00000025808	Aars2	-85
NONRATT021570.2	ENSRNOT00000031549	ENSRNOG00000025808	Aars2	-84.3
NONRATT017977.2	ENSRNOT00000031549	ENSRNOG00000025808	Aars2	-90.1
NONRATT014240.2	ENSRNOT00000031549	ENSRNOG00000025808	Aars2	-87.9
NONRATT008688.2	ENSRNOT00000031549	ENSRNOG00000025808	Aars2	-88.4
NONRATT004661.2	ENSRNOT00000031549	ENSRNOG00000025808	Aars2	-79.5
NONRATT000606.2	ENSRNOT00000031549	ENSRNOG00000025808	Aars2	-87.9
NONRATT029310.2	ENSRNOT00000028047	ENSRNOG00000020658	Aarsd1	-74.4
NONRATT025222.2	ENSRNOT00000028047	ENSRNOG00000020658	Aarsd1	-75.8
NONRATT024782.2	ENSRNOT00000028047	ENSRNOG00000020658	Aarsd1	-80.4
NONRATT021035.2	ENSRNOT00000028047	ENSRNOG00000020658	Aarsd1	-72.2
NONRATT017283.2	ENSRNOT00000028047	ENSRNOG00000020658	Aarsd1	-80.7
NONRATT010578.2	ENSRNOT00000028047	ENSRNOG00000020658	Aarsd1	-73.9
ENSRNOT00000089552	ENSRNOT00000028047	ENSRNOG00000020658	Aarsd1	-76.5
ENSRNOT00000089288	ENSRNOT00000028047	ENSRNOG00000020658	Aarsd1	-76
NONRATT027796.2	ENSRNOT00000012222	ENSRNOG00000008557	Abcb8	-77.7
NONRATT027796.2	ENSRNOT00000089817	ENSRNOG00000008557	Abcb8	-77.7
NONRATT021570.2	ENSRNOT00000012222	ENSRNOG00000008557	Abcb8	-73.7
NONRATT021570.2	ENSRNOT00000089817	ENSRNOG00000008557	Abcb8	-73.7
NONRATT025772.2	ENSRNOT00000021064	ENSRNOG00000015538	Abcd2	-82.2
NONRATT023910.2	ENSRNOT00000021064	ENSRNOG00000015538	Abcd2	-89.8
NONRATT023587.2	ENSRNOT00000021064	ENSRNOG00000015538	Abcd2	-92.5
NONRATT017977.2	ENSRNOT00000021064	ENSRNOG00000015538	Abcd2	-86.5
NONRATT014240.2	ENSRNOT00000021064	ENSRNOG00000015538	Abcd2	-91.5
NONRATT008688.2	ENSRNOT00000021064	ENSRNOG00000015538	Abcd2	-84.8
NONRATT004661.2	ENSRNOT00000021064	ENSRNOG00000015538	Abcd2	-89.5
NONRATT000606.2	ENSRNOT00000021064	ENSRNOG00000015538	Abcd2	-91.5
NONRATT025772.2	ENSRNOT00000016040	ENSRNOG00000011964	Abcd4	-79.6
NONRATT023910.2	ENSRNOT00000016040	ENSRNOG00000011964	Abcd4	-86
NONRATT023587.2	ENSRNOT00000016040	ENSRNOG00000011964	Abcd4	-90.8
NONRATT017977.2	ENSRNOT00000016040	ENSRNOG00000011964	Abcd4	-84.8
NONRATT014240.2	ENSRNOT00000016040	ENSRNOG00000011964	Abcd4	-93.2
NONRATT008688.2	ENSRNOT00000016040	ENSRNOG00000011964	Abcd4	-83.6
NONRATT004661.2	ENSRNOT00000016040	ENSRNOG00000011964	Abcd4	-88.3
NONRATT000606.2	ENSRNOT00000016040	ENSRNOG00000011964	Abcd4	-93.2
NONRATT027796.2	ENSRNOT00000025560	ENSRNOG00000018910	Abhd11	-81.1
NONRATT021570.2	ENSRNOT00000025560	ENSRNOG00000018910	Abhd11	-81.1
NONRATT017510.2	ENSRNOT00000025560	ENSRNOG00000018910	Abhd11	-78.5
NONRATT025772.2	ENSRNOT00000080099	ENSRNOG00000056621	AC099384.2	-82.7
NONRATT023910.2	ENSRNOT00000080099	ENSRNOG00000056621	AC099384.2	-86.5
NONRATT023587.2	ENSRNOT00000080099	ENSRNOG00000056621	AC099384.2	-81.2
NONRATT017977.2	ENSRNOT00000080099	ENSRNOG00000056621	AC099384.2	-84.9
NONRATT008688.2	ENSRNOT00000080099	ENSRNOG00000056621	AC099384.2	-81.5
NONRATT004661.2	ENSRNOT00000080099	ENSRNOG00000056621	AC099384.2	-79.4
NONRATT000606.2	ENSRNOT00000080099	ENSRNOG00000056621	AC099384.2	-81.5
NONRATT028716.2	ENSRNOT00000087411	ENSRNOG00000060693	AC118147.2	-82.3
NONRATT026181.2	ENSRNOT00000087411	ENSRNOG00000060693	AC118147.2	-85.6
NONRATT017960.2	ENSRNOT00000087411	ENSRNOG00000060693	AC118147.2	-82.3
NONRATT014517.2	ENSRNOT00000087411	ENSRNOG00000060693	AC118147.2	-80.3
NONRATT013372.2	ENSRNOT00000087411	ENSRNOG00000060693	AC118147.2	-92.1
NONRATT012710.2	ENSRNOT00000087411	ENSRNOG00000060693	AC118147.2	-88
NONRATT011845.2	ENSRNOT00000087411	ENSRNOG00000060693	AC118147.2	-91
NONRATT006496.2	ENSRNOT00000087411	ENSRNOG00000060693	AC118147.2	-87.8
NONRATT001051.2	ENSRNOT00000087411	ENSRNOG00000060693	AC118147.2	-81.4
NONRATT027796.2	ENSRNOT00000030173	ENSRNOG00000022022	AC128967.1	-81.1
NONRATT021570.2	ENSRNOT00000030173	ENSRNOG00000022022	AC128967.1	-82.6
NONRATT017510.2	ENSRNOT00000030173	ENSRNOG00000022022	AC128967.1	-77.5
NONRATT028716.2	ENSRNOT00000083110	ENSRNOG00000056011	AC139950.1	-96.6
NONRATT026181.2	ENSRNOT00000083110	ENSRNOG00000056011	AC139950.1	-90
NONRATT021076.2	ENSRNOT00000083110	ENSRNOG00000056011	AC139950.1	-93.5
NONRATT018825.2	ENSRNOT00000083110	ENSRNOG00000056011	AC139950.1	-87.5
NONRATT017960.2	ENSRNOT00000083110	ENSRNOG00000056011	AC139950.1	-95.2
NONRATT014517.2	ENSRNOT00000083110	ENSRNOG00000056011	AC139950.1	-95.2
NONRATT013372.2	ENSRNOT00000083110	ENSRNOG00000056011	AC139950.1	-89.4
NONRATT012710.2	ENSRNOT00000083110	ENSRNOG00000056011	AC139950.1	-89.3
NONRATT011845.2	ENSRNOT00000083110	ENSRNOG00000056011	AC139950.1	-88.3
NONRATT006496.2	ENSRNOT00000083110	ENSRNOG00000056011	AC139950.1	-91.9
NONRATT005891.2	ENSRNOT00000083110	ENSRNOG00000056011	AC139950.1	-93.2
NONRATT001051.2	ENSRNOT00000083110	ENSRNOG00000056011	AC139950.1	-96.6
ENSRNOT00000089552	ENSRNOT00000083110	ENSRNOG00000056011	AC139950.1	-91.9
ENSRNOT00000089288	ENSRNOT00000083110	ENSRNOG00000056011	AC139950.1	-79.7
NONRATT025772.2	ENSRNOT00000010056	ENSRNOG00000007637	Acer2	-80.9
NONRATT023910.2	ENSRNOT00000010056	ENSRNOG00000007637	Acer2	-87.5
NONRATT023587.2	ENSRNOT00000010056	ENSRNOG00000007637	Acer2	-92.6
NONRATT017977.2	ENSRNOT00000010056	ENSRNOG00000007637	Acer2	-86.6
NONRATT014240.2	ENSRNOT00000010056	ENSRNOG00000007637	Acer2	-95.8
NONRATT008688.2	ENSRNOT00000010056	ENSRNOG00000007637	Acer2	-84.9
NONRATT004661.2	ENSRNOT00000010056	ENSRNOG00000007637	Acer2	-87.5
NONRATT001442.2	ENSRNOT00000010056	ENSRNOG00000007637	Acer2	-87.5
NONRATT000606.2	ENSRNOT00000010056	ENSRNOG00000007637	Acer2	-95.8
NONRATT028716.2	ENSRNOT00000019987	ENSRNOG00000036866	Acer3	-84.8
NONRATT026181.2	ENSRNOT00000019987	ENSRNOG00000036866	Acer3	-89.5
NONRATT018825.2	ENSRNOT00000019987	ENSRNOG00000036866	Acer3	-87
NONRATT017960.2	ENSRNOT00000019987	ENSRNOG00000036866	Acer3	-81.8
NONRATT014517.2	ENSRNOT00000019987	ENSRNOG00000036866	Acer3	-83.4
NONRATT013372.2	ENSRNOT00000019987	ENSRNOG00000036866	Acer3	-88.5
NONRATT012710.2	ENSRNOT00000019987	ENSRNOG00000036866	Acer3	-88.8
NONRATT011845.2	ENSRNOT00000019987	ENSRNOG00000036866	Acer3	-86.2
NONRATT006496.2	ENSRNOT00000019987	ENSRNOG00000036866	Acer3	-91.4
NONRATT005891.2	ENSRNOT00000019987	ENSRNOG00000036866	Acer3	-79.7
NONRATT001051.2	ENSRNOT00000019987	ENSRNOG00000036866	Acer3	-84.8
ENSRNOT00000089552	ENSRNOT00000019987	ENSRNOG00000036866	Acer3	-91.4
ENSRNOT00000089288	ENSRNOT00000019987	ENSRNOG00000036866	Acer3	-77.9
NONRATT029310.2	ENSRNOT00000076602	ENSRNOG00000024128	Aco2	-80.6
NONRATT028716.2	ENSRNOT00000076602	ENSRNOG00000024128	Aco2	-95.4
NONRATT028716.2	ENSRNOT00000076823	ENSRNOG00000024128	Aco2	-95.4
NONRATT027796.2	ENSRNOT00000038612	ENSRNOG00000024128	Aco2	-81.8
NONRATT026181.2	ENSRNOT00000076823	ENSRNOG00000024128	Aco2	-89
NONRATT026181.2	ENSRNOT00000076602	ENSRNOG00000024128	Aco2	-89
NONRATT024782.2	ENSRNOT00000076602	ENSRNOG00000024128	Aco2	-81.6
NONRATT021570.2	ENSRNOT00000038612	ENSRNOG00000024128	Aco2	-81.1
NONRATT021076.2	ENSRNOT00000076602	ENSRNOG00000024128	Aco2	-93.5
NONRATT021076.2	ENSRNOT00000076823	ENSRNOG00000024128	Aco2	-93.5
NONRATT018825.2	ENSRNOT00000076823	ENSRNOG00000024128	Aco2	-86.3
NONRATT018825.2	ENSRNOT00000076602	ENSRNOG00000024128	Aco2	-86.3
NONRATT017960.2	ENSRNOT00000076602	ENSRNOG00000024128	Aco2	-91.5
NONRATT017960.2	ENSRNOT00000076823	ENSRNOG00000024128	Aco2	-91.5
NONRATT014517.2	ENSRNOT00000076823	ENSRNOG00000024128	Aco2	-95.4
NONRATT014517.2	ENSRNOT00000076602	ENSRNOG00000024128	Aco2	-95.4
NONRATT013372.2	ENSRNOT00000076823	ENSRNOG00000024128	Aco2	-87.7
NONRATT013372.2	ENSRNOT00000076602	ENSRNOG00000024128	Aco2	-87.7
NONRATT012710.2	ENSRNOT00000076602	ENSRNOG00000024128	Aco2	-88.1
NONRATT012710.2	ENSRNOT00000076823	ENSRNOG00000024128	Aco2	-88.1
NONRATT011845.2	ENSRNOT00000076823	ENSRNOG00000024128	Aco2	-84.6
NONRATT011845.2	ENSRNOT00000076602	ENSRNOG00000024128	Aco2	-84.6
NONRATT010218.2	ENSRNOT00000038612	ENSRNOG00000024128	Aco2	-76
NONRATT006496.2	ENSRNOT00000076823	ENSRNOG00000024128	Aco2	-90.7
NONRATT006496.2	ENSRNOT00000076602	ENSRNOG00000024128	Aco2	-90.7
NONRATT005891.2	ENSRNOT00000076602	ENSRNOG00000024128	Aco2	-93.2
NONRATT005891.2	ENSRNOT00000076823	ENSRNOG00000024128	Aco2	-93.2
NONRATT001051.2	ENSRNOT00000076823	ENSRNOG00000024128	Aco2	-95.4
NONRATT001051.2	ENSRNOT00000076602	ENSRNOG00000024128	Aco2	-95.4
ENSRNOT00000089552	ENSRNOT00000076602	ENSRNOG00000024128	Aco2	-90.7
ENSRNOT00000089552	ENSRNOT00000076823	ENSRNOG00000024128	Aco2	-90.7
ENSRNOT00000089288	ENSRNOT00000076823	ENSRNOG00000024128	Aco2	-77.4
ENSRNOT00000089288	ENSRNOT00000076602	ENSRNOG00000024128	Aco2	-78.9
NONRATT025772.2	ENSRNOT00000013515	ENSRNOG00000010134	Acot2	-88.1
NONRATT023910.2	ENSRNOT00000013515	ENSRNOG00000010134	Acot2	-96.2
NONRATT023587.2	ENSRNOT00000013515	ENSRNOG00000010134	Acot2	-88.7
NONRATT017977.2	ENSRNOT00000013515	ENSRNOG00000010134	Acot2	-94
NONRATT014240.2	ENSRNOT00000013515	ENSRNOG00000010134	Acot2	-91.1
NONRATT008688.2	ENSRNOT00000013515	ENSRNOG00000010134	Acot2	-92.3
NONRATT004661.2	ENSRNOT00000013515	ENSRNOG00000010134	Acot2	-83.5
NONRATT000606.2	ENSRNOT00000013515	ENSRNOG00000010134	Acot2	-91.1
NONRATT028716.2	ENSRNOT00000085585	ENSRNOG00000011820	Acpp	-82
NONRATT026181.2	ENSRNOT00000085585	ENSRNOG00000011820	Acpp	-86.2
NONRATT018825.2	ENSRNOT00000085585	ENSRNOG00000011820	Acpp	-80.1
NONRATT017960.2	ENSRNOT00000085585	ENSRNOG00000011820	Acpp	-82
NONRATT014517.2	ENSRNOT00000085585	ENSRNOG00000011820	Acpp	-80
NONRATT013372.2	ENSRNOT00000085585	ENSRNOG00000011820	Acpp	-88.3
NONRATT012710.2	ENSRNOT00000085585	ENSRNOG00000011820	Acpp	-88.6
NONRATT011845.2	ENSRNOT00000085585	ENSRNOG00000011820	Acpp	-88.3
NONRATT006496.2	ENSRNOT00000085585	ENSRNOG00000011820	Acpp	-84.5
NONRATT005891.2	ENSRNOT00000085585	ENSRNOG00000011820	Acpp	-80
NONRATT001051.2	ENSRNOT00000085585	ENSRNOG00000011820	Acpp	-82
NONRATT028716.2	ENSRNOT00000010300	ENSRNOG00000007504	Actr10	-85.2
NONRATT026181.2	ENSRNOT00000010300	ENSRNOG00000007504	Actr10	-92.5
NONRATT017960.2	ENSRNOT00000010300	ENSRNOG00000007504	Actr10	-85.2
NONRATT014517.2	ENSRNOT00000010300	ENSRNOG00000007504	Actr10	-83.2
NONRATT013372.2	ENSRNOT00000010300	ENSRNOG00000007504	Actr10	-85.8
NONRATT012710.2	ENSRNOT00000010300	ENSRNOG00000007504	Actr10	-86
NONRATT011845.2	ENSRNOT00000010300	ENSRNOG00000007504	Actr10	-84.9
NONRATT006496.2	ENSRNOT00000010300	ENSRNOG00000007504	Actr10	-88.6
NONRATT005891.2	ENSRNOT00000010300	ENSRNOG00000007504	Actr10	-82
NONRATT001051.2	ENSRNOT00000010300	ENSRNOG00000007504	Actr10	-82.7
NONRATT028716.2	ENSRNOT00000025733	ENSRNOG00000019044	Adam30	-95.4
NONRATT026181.2	ENSRNOT00000025733	ENSRNOG00000019044	Adam30	-89
NONRATT021076.2	ENSRNOT00000025733	ENSRNOG00000019044	Adam30	-93.5
NONRATT018825.2	ENSRNOT00000025733	ENSRNOG00000019044	Adam30	-86.3
NONRATT017960.2	ENSRNOT00000025733	ENSRNOG00000019044	Adam30	-91.5
NONRATT014517.2	ENSRNOT00000025733	ENSRNOG00000019044	Adam30	-95.4
NONRATT012710.2	ENSRNOT00000025733	ENSRNOG00000019044	Adam30	-88.1
NONRATT011845.2	ENSRNOT00000025733	ENSRNOG00000019044	Adam30	-84.6
NONRATT006496.2	ENSRNOT00000025733	ENSRNOG00000019044	Adam30	-90.7
NONRATT005891.2	ENSRNOT00000025733	ENSRNOG00000019044	Adam30	-93.2
NONRATT001051.2	ENSRNOT00000025733	ENSRNOG00000019044	Adam30	-95.4
ENSRNOT00000089552	ENSRNOT00000025733	ENSRNOG00000019044	Adam30	-90.7
ENSRNOT00000089288	ENSRNOT00000025733	ENSRNOG00000019044	Adam30	-77.4
NONRATT008852.2	ENSRNOT00000026309	ENSRNOG00000019434	Adat1	-76.6
NONRATT006938.2	ENSRNOT00000026309	ENSRNOG00000019434	Adat1	-88.4
NONRATT004661.2	ENSRNOT00000026309	ENSRNOG00000019434	Adat1	-77.2
NONRATT028716.2	ENSRNOT00000036993	ENSRNOG00000012436	Adh6	-95.4
NONRATT026181.2	ENSRNOT00000036993	ENSRNOG00000012436	Adh6	-89
NONRATT017960.2	ENSRNOT00000036993	ENSRNOG00000012436	Adh6	-91.5
NONRATT014517.2	ENSRNOT00000036993	ENSRNOG00000012436	Adh6	-95.4
NONRATT013372.2	ENSRNOT00000036993	ENSRNOG00000012436	Adh6	-87.7
NONRATT012710.2	ENSRNOT00000036993	ENSRNOG00000012436	Adh6	-88.1
NONRATT011845.2	ENSRNOT00000036993	ENSRNOG00000012436	Adh6	-84.6
NONRATT006496.2	ENSRNOT00000036993	ENSRNOG00000012436	Adh6	-90.7
NONRATT005891.2	ENSRNOT00000036993	ENSRNOG00000012436	Adh6	-93.2
NONRATT001051.2	ENSRNOT00000036993	ENSRNOG00000012436	Adh6	-95.4
NONRATT027796.2	ENSRNOT00000089988	ENSRNOG00000001821	Adipoq	-84.3
NONRATT021570.2	ENSRNOT00000089988	ENSRNOG00000001821	Adipoq	-84.3
NONRATT010218.2	ENSRNOT00000089988	ENSRNOG00000001821	Adipoq	-81.6
NONRATT028716.2	ENSRNOT00000013022	ENSRNOG00000026178	Adpgk	-77.2
NONRATT026181.2	ENSRNOT00000013022	ENSRNOG00000026178	Adpgk	-79.3
NONRATT017960.2	ENSRNOT00000013022	ENSRNOG00000026178	Adpgk	-77.2
NONRATT012710.2	ENSRNOT00000013022	ENSRNOG00000026178	Adpgk	-81.2
NONRATT011845.2	ENSRNOT00000013022	ENSRNOG00000026178	Adpgk	-81.6
NONRATT001051.2	ENSRNOT00000013022	ENSRNOG00000026178	Adpgk	-77.2
NONRATT007757.2	ENSRNOT00000025193	ENSRNOG00000018655	Adsl	-83.5
NONRATT001442.2	ENSRNOT00000025193	ENSRNOG00000018655	Adsl	-83.1
NONRATT028716.2	ENSRNOT00000009440	ENSRNOG00000006965	Aff4	-84.8
NONRATT026181.2	ENSRNOT00000009440	ENSRNOG00000006965	Aff4	-78.8
NONRATT021076.2	ENSRNOT00000009440	ENSRNOG00000006965	Aff4	-81.1
NONRATT018825.2	ENSRNOT00000009440	ENSRNOG00000006965	Aff4	-73.9
NONRATT017960.2	ENSRNOT00000009440	ENSRNOG00000006965	Aff4	-79.1
NONRATT014517.2	ENSRNOT00000009440	ENSRNOG00000006965	Aff4	-87.5
NONRATT012710.2	ENSRNOT00000009440	ENSRNOG00000006965	Aff4	-77.1
NONRATT011845.2	ENSRNOT00000009440	ENSRNOG00000006965	Aff4	-73.6
NONRATT005891.2	ENSRNOT00000009440	ENSRNOG00000006965	Aff4	-87.1
NONRATT001051.2	ENSRNOT00000009440	ENSRNOG00000006965	Aff4	-83
ENSRNOT00000089288	ENSRNOT00000009440	ENSRNOG00000006965	Aff4	-65
NONRATT030282.2	ENSRNOT00000073809	ENSRNOG00000050205	Afmid	-78.7
NONRATT027796.2	ENSRNOT00000073809	ENSRNOG00000050205	Afmid	-88.3
NONRATT021570.2	ENSRNOT00000073809	ENSRNOG00000050205	Afmid	-82.8
NONRATT017510.2	ENSRNOT00000073809	ENSRNOG00000050205	Afmid	-77.5
NONRATT029310.2	ENSRNOT00000055735	ENSRNOG00000016214	Agl	-78.1
NONRATT024782.2	ENSRNOT00000055735	ENSRNOG00000016214	Agl	-84.5
NONRATT023910.2	ENSRNOT00000055735	ENSRNOG00000016214	Agl	-89.1
NONRATT023587.2	ENSRNOT00000055735	ENSRNOG00000016214	Agl	-86.1
NONRATT022043.2	ENSRNOT00000055735	ENSRNOG00000016214	Agl	-73.4
NONRATT021035.2	ENSRNOT00000055735	ENSRNOG00000016214	Agl	-76.2
NONRATT017977.2	ENSRNOT00000055735	ENSRNOG00000016214	Agl	-86.9
NONRATT014240.2	ENSRNOT00000055735	ENSRNOG00000016214	Agl	-83.3
NONRATT010578.2	ENSRNOT00000055735	ENSRNOG00000016214	Agl	-73.9
NONRATT008688.2	ENSRNOT00000055735	ENSRNOG00000016214	Agl	-86.2
NONRATT004661.2	ENSRNOT00000055735	ENSRNOG00000016214	Agl	-84.3
NONRATT000606.2	ENSRNOT00000055735	ENSRNOG00000016214	Agl	-83.3
ENSRNOT00000089552	ENSRNOT00000055735	ENSRNOG00000016214	Agl	-83.8
ENSRNOT00000089288	ENSRNOT00000055735	ENSRNOG00000016214	Agl	-72.8
NONRATT028716.2	ENSRNOT00000011747	ENSRNOG00000008619	Agtrap	-91
NONRATT026181.2	ENSRNOT00000011747	ENSRNOG00000008619	Agtrap	-84.6
NONRATT021076.2	ENSRNOT00000011747	ENSRNOG00000008619	Agtrap	-89.1
NONRATT018825.2	ENSRNOT00000011747	ENSRNOG00000008619	Agtrap	-81.9
NONRATT017960.2	ENSRNOT00000011747	ENSRNOG00000008619	Agtrap	-87.1
NONRATT014517.2	ENSRNOT00000011747	ENSRNOG00000008619	Agtrap	-91
NONRATT013372.2	ENSRNOT00000011747	ENSRNOG00000008619	Agtrap	-83.3
NONRATT012710.2	ENSRNOT00000011747	ENSRNOG00000008619	Agtrap	-83.7
NONRATT011845.2	ENSRNOT00000011747	ENSRNOG00000008619	Agtrap	-80.2
NONRATT006496.2	ENSRNOT00000011747	ENSRNOG00000008619	Agtrap	-86.3
NONRATT005891.2	ENSRNOT00000011747	ENSRNOG00000008619	Agtrap	-88.8
NONRATT001051.2	ENSRNOT00000011747	ENSRNOG00000008619	Agtrap	-91
ENSRNOT00000089552	ENSRNOT00000011747	ENSRNOG00000008619	Agtrap	-86.3
ENSRNOT00000089288	ENSRNOT00000011747	ENSRNOG00000008619	Agtrap	-74.4
NONRATT025772.2	ENSRNOT00000084642	ENSRNOG00000052142	Ahsa2	-83.6
NONRATT023910.2	ENSRNOT00000084642	ENSRNOG00000052142	Ahsa2	-91.7
NONRATT023587.2	ENSRNOT00000084642	ENSRNOG00000052142	Ahsa2	-86.1
NONRATT017977.2	ENSRNOT00000084642	ENSRNOG00000052142	Ahsa2	-89.5
NONRATT014240.2	ENSRNOT00000084642	ENSRNOG00000052142	Ahsa2	-86.6
NONRATT008688.2	ENSRNOT00000084642	ENSRNOG00000052142	Ahsa2	-87.8
NONRATT004661.2	ENSRNOT00000084642	ENSRNOG00000052142	Ahsa2	-84.3
NONRATT000606.2	ENSRNOT00000084642	ENSRNOG00000052142	Ahsa2	-86.6
NONRATT025772.2	ENSRNOT00000013286	ENSRNOG00000009951	Aif1l	-80.3
NONRATT023910.2	ENSRNOT00000013286	ENSRNOG00000009951	Aif1l	-87.7
NONRATT023587.2	ENSRNOT00000013286	ENSRNOG00000009951	Aif1l	-91.5
NONRATT017977.2	ENSRNOT00000013286	ENSRNOG00000009951	Aif1l	-85.5
NONRATT014240.2	ENSRNOT00000013286	ENSRNOG00000009951	Aif1l	-93.9
NONRATT008688.2	ENSRNOT00000013286	ENSRNOG00000009951	Aif1l	-83.8
NONRATT004661.2	ENSRNOT00000013286	ENSRNOG00000009951	Aif1l	-83.4
NONRATT000606.2	ENSRNOT00000013286	ENSRNOG00000009951	Aif1l	-93.9
NONRATT028716.2	ENSRNOT00000079875	ENSRNOG00000052506	Ak3	-89.3
NONRATT026181.2	ENSRNOT00000079875	ENSRNOG00000052506	Ak3	-88.4
NONRATT017960.2	ENSRNOT00000079875	ENSRNOG00000052506	Ak3	-87.9
NONRATT014517.2	ENSRNOT00000079875	ENSRNOG00000052506	Ak3	-88.1
NONRATT012710.2	ENSRNOT00000079875	ENSRNOG00000052506	Ak3	-82
NONRATT011845.2	ENSRNOT00000079875	ENSRNOG00000052506	Ak3	-84.4
NONRATT006496.2	ENSRNOT00000079875	ENSRNOG00000052506	Ak3	-84.6
NONRATT005891.2	ENSRNOT00000079875	ENSRNOG00000052506	Ak3	-85.9
NONRATT001051.2	ENSRNOT00000079875	ENSRNOG00000052506	Ak3	-89.3
NONRATT027796.2	ENSRNOT00000018497	ENSRNOG00000013744	Akip1	-77.5
NONRATT021570.2	ENSRNOT00000018497	ENSRNOG00000013744	Akip1	-82.8
NONRATT013083.2	ENSRNOT00000041925	ENSRNOG00000033010	Akr1c12	-61.3
NONRATT013083.2	ENSRNOT00000064884	ENSRNOG00000050243	Akr1c12l1	-82.4
NONRATT013083.2	ENSRNOT00000029049	ENSRNOG00000050040	Akr1c13	-82.4
NONRATT007757.2	ENSRNOT00000005611	ENSRNOG00000004027	Aldh9a1	-84.7
NONRATT028716.2	ENSRNOT00000016389	ENSRNOG00000012264	Alkbh1	-96.6
NONRATT026181.2	ENSRNOT00000016389	ENSRNOG00000012264	Alkbh1	-90
NONRATT021076.2	ENSRNOT00000016389	ENSRNOG00000012264	Alkbh1	-93.5
NONRATT018825.2	ENSRNOT00000016389	ENSRNOG00000012264	Alkbh1	-87.5
NONRATT017960.2	ENSRNOT00000016389	ENSRNOG00000012264	Alkbh1	-95.2
NONRATT014517.2	ENSRNOT00000016389	ENSRNOG00000012264	Alkbh1	-95.4
NONRATT013372.2	ENSRNOT00000016389	ENSRNOG00000012264	Alkbh1	-89.4
NONRATT012710.2	ENSRNOT00000016389	ENSRNOG00000012264	Alkbh1	-89.3
NONRATT011845.2	ENSRNOT00000016389	ENSRNOG00000012264	Alkbh1	-88.3
NONRATT006496.2	ENSRNOT00000016389	ENSRNOG00000012264	Alkbh1	-91.9
NONRATT005891.2	ENSRNOT00000016389	ENSRNOG00000012264	Alkbh1	-93.2
NONRATT001051.2	ENSRNOT00000016389	ENSRNOG00000012264	Alkbh1	-96.6
ENSRNOT00000089552	ENSRNOT00000016389	ENSRNOG00000012264	Alkbh1	-91.9
ENSRNOT00000089288	ENSRNOT00000016389	ENSRNOG00000012264	Alkbh1	-79.7
NONRATT028716.2	ENSRNOT00000007588	ENSRNOG00000026702	Amica1	-84.6
NONRATT027796.2	ENSRNOT00000007588	ENSRNOG00000026702	Amica1	-86.5
NONRATT026181.2	ENSRNOT00000007588	ENSRNOG00000026702	Amica1	-86.8
NONRATT021570.2	ENSRNOT00000007588	ENSRNOG00000026702	Amica1	-84.1
NONRATT018825.2	ENSRNOT00000007588	ENSRNOG00000026702	Amica1	-83.7
NONRATT017960.2	ENSRNOT00000007588	ENSRNOG00000026702	Amica1	-84.8
NONRATT017510.2	ENSRNOT00000007588	ENSRNOG00000026702	Amica1	-85.1
NONRATT014517.2	ENSRNOT00000007588	ENSRNOG00000026702	Amica1	-84.1
NONRATT013372.2	ENSRNOT00000007588	ENSRNOG00000026702	Amica1	-86
NONRATT012710.2	ENSRNOT00000007588	ENSRNOG00000026702	Amica1	-85.5
NONRATT011845.2	ENSRNOT00000007588	ENSRNOG00000026702	Amica1	-85.9
NONRATT006496.2	ENSRNOT00000007588	ENSRNOG00000026702	Amica1	-88.1
NONRATT005891.2	ENSRNOT00000007588	ENSRNOG00000026702	Amica1	-84.8
NONRATT001051.2	ENSRNOT00000007588	ENSRNOG00000026702	Amica1	-84.6
ENSRNOT00000089552	ENSRNOT00000007588	ENSRNOG00000026702	Amica1	-88.1
ENSRNOT00000089288	ENSRNOT00000007588	ENSRNOG00000026702	Amica1	-75.2
NONRATT027796.2	ENSRNOT00000055875	ENSRNOG00000016965	Anapc1	-78.6
NONRATT021570.2	ENSRNOT00000055875	ENSRNOG00000016965	Anapc1	-78.9
NONRATT017510.2	ENSRNOT00000055875	ENSRNOG00000016965	Anapc1	-82.8
NONRATT025772.2	ENSRNOT00000054954	ENSRNOG00000036686	Anapc11	-80.9
NONRATT023910.2	ENSRNOT00000054954	ENSRNOG00000036686	Anapc11	-87.5
NONRATT023587.2	ENSRNOT00000054954	ENSRNOG00000036686	Anapc11	-92.6
NONRATT017977.2	ENSRNOT00000054954	ENSRNOG00000036686	Anapc11	-86.6
NONRATT014240.2	ENSRNOT00000054954	ENSRNOG00000036686	Anapc11	-95.8
NONRATT008688.2	ENSRNOT00000054954	ENSRNOG00000036686	Anapc11	-84.9
NONRATT004661.2	ENSRNOT00000054954	ENSRNOG00000036686	Anapc11	-87.2
NONRATT001442.2	ENSRNOT00000054954	ENSRNOG00000036686	Anapc11	-87.9
NONRATT000606.2	ENSRNOT00000054954	ENSRNOG00000036686	Anapc11	-95.8
NONRATT030282.2	ENSRNOT00000005084	ENSRNOG00000003795	Angel2	-69.8
NONRATT027796.2	ENSRNOT00000005084	ENSRNOG00000003795	Angel2	-85.5
NONRATT021570.2	ENSRNOT00000005084	ENSRNOG00000003795	Angel2	-81.1
NONRATT027796.2	ENSRNOT00000073562	ENSRNOG00000006717	Ankrd26	-71.4
NONRATT030282.2	ENSRNOT00000021685	ENSRNOG00000023995	Ankrd39	-73.5
NONRATT027796.2	ENSRNOT00000021685	ENSRNOG00000023995	Ankrd39	-84.3
NONRATT021570.2	ENSRNOT00000021685	ENSRNOG00000023995	Ankrd39	-84.3
NONRATT013022.2	ENSRNOT00000087838	ENSRNOG00000054964	Aoah	-88.8
NONRATT007757.2	ENSRNOT00000076820	ENSRNOG00000051307	Aoc3	-87.4
NONRATT025772.2	ENSRNOT00000081146	ENSRNOG00000014555	Aox4	-76.4
NONRATT023910.2	ENSRNOT00000081146	ENSRNOG00000014555	Aox4	-83
NONRATT023587.2	ENSRNOT00000081146	ENSRNOG00000014555	Aox4	-88.1
NONRATT017977.2	ENSRNOT00000081146	ENSRNOG00000014555	Aox4	-82.1
NONRATT014240.2	ENSRNOT00000081146	ENSRNOG00000014555	Aox4	-91.3
NONRATT008688.2	ENSRNOT00000081146	ENSRNOG00000014555	Aox4	-81.6
NONRATT004661.2	ENSRNOT00000081146	ENSRNOG00000014555	Aox4	-84.1
NONRATT001442.2	ENSRNOT00000081146	ENSRNOG00000014555	Aox4	-83.4
NONRATT000606.2	ENSRNOT00000081146	ENSRNOG00000014555	Aox4	-91.3
NONRATT027796.2	ENSRNOT00000036185	ENSRNOG00000026114	Ap5b1	-84.1
NONRATT021570.2	ENSRNOT00000036185	ENSRNOG00000026114	Ap5b1	-82.5
NONRATT007757.2	ENSRNOT00000036185	ENSRNOG00000026114	Ap5b1	-73.1
NONRATT028716.2	ENSRNOT00000010869	ENSRNOG00000008022	Apaf1	-96.6
NONRATT026181.2	ENSRNOT00000010869	ENSRNOG00000008022	Apaf1	-90
NONRATT018825.2	ENSRNOT00000010869	ENSRNOG00000008022	Apaf1	-87.5
NONRATT017960.2	ENSRNOT00000010869	ENSRNOG00000008022	Apaf1	-95.2
NONRATT014517.2	ENSRNOT00000010869	ENSRNOG00000008022	Apaf1	-95.4
NONRATT013372.2	ENSRNOT00000010869	ENSRNOG00000008022	Apaf1	-89.4
NONRATT012710.2	ENSRNOT00000010869	ENSRNOG00000008022	Apaf1	-89.3
NONRATT011845.2	ENSRNOT00000010869	ENSRNOG00000008022	Apaf1	-88.3
NONRATT006496.2	ENSRNOT00000010869	ENSRNOG00000008022	Apaf1	-91.9
NONRATT005891.2	ENSRNOT00000010869	ENSRNOG00000008022	Apaf1	-93.2
NONRATT001051.2	ENSRNOT00000010869	ENSRNOG00000008022	Apaf1	-96.6
NONRATT025772.2	ENSRNOT00000012379	ENSRNOG00000009227	Aplnr	-81.5
NONRATT023910.2	ENSRNOT00000012379	ENSRNOG00000009227	Aplnr	-89.6
NONRATT023587.2	ENSRNOT00000012379	ENSRNOG00000009227	Aplnr	-86.1
NONRATT017977.2	ENSRNOT00000012379	ENSRNOG00000009227	Aplnr	-87.4
NONRATT014240.2	ENSRNOT00000012379	ENSRNOG00000009227	Aplnr	-85.4
NONRATT008688.2	ENSRNOT00000012379	ENSRNOG00000009227	Aplnr	-86.2
NONRATT004661.2	ENSRNOT00000012379	ENSRNOG00000009227	Aplnr	-84.3
NONRATT000606.2	ENSRNOT00000012379	ENSRNOG00000009227	Aplnr	-85.4
NONRATT025772.2	ENSRNOT00000033684	ENSRNOG00000027654	Appbp2	-92.7
NONRATT023910.2	ENSRNOT00000033684	ENSRNOG00000027654	Appbp2	-94
NONRATT023587.2	ENSRNOT00000033684	ENSRNOG00000027654	Appbp2	-86.5
NONRATT017977.2	ENSRNOT00000033684	ENSRNOG00000027654	Appbp2	-91.5
NONRATT014240.2	ENSRNOT00000033684	ENSRNOG00000027654	Appbp2	-88.9
NONRATT008688.2	ENSRNOT00000033684	ENSRNOG00000027654	Appbp2	-90.5
NONRATT004661.2	ENSRNOT00000033684	ENSRNOG00000027654	Appbp2	-82.5
NONRATT000606.2	ENSRNOT00000033684	ENSRNOG00000027654	Appbp2	-88.9
NONRATT023910.2	ENSRNOT00000031336	ENSRNOG00000021433	Arhgef39	-73.6
NONRATT023587.2	ENSRNOT00000031336	ENSRNOG00000021433	Arhgef39	-77.1
NONRATT017977.2	ENSRNOT00000031336	ENSRNOG00000021433	Arhgef39	-79.9
NONRATT008688.2	ENSRNOT00000031336	ENSRNOG00000021433	Arhgef39	-82.8
NONRATT004661.2	ENSRNOT00000031336	ENSRNOG00000021433	Arhgef39	-75.2
NONRATT000606.2	ENSRNOT00000031336	ENSRNOG00000021433	Arhgef39	-79.9
NONRATT028716.2	ENSRNOT00000051349	ENSRNOG00000018714	Arl5b	-79.7
NONRATT026181.2	ENSRNOT00000051349	ENSRNOG00000018714	Arl5b	-82.4
NONRATT018825.2	ENSRNOT00000051349	ENSRNOG00000018714	Arl5b	-82.3
NONRATT017960.2	ENSRNOT00000051349	ENSRNOG00000018714	Arl5b	-79.7
NONRATT014517.2	ENSRNOT00000051349	ENSRNOG00000018714	Arl5b	-77.7
NONRATT013372.2	ENSRNOT00000051349	ENSRNOG00000018714	Arl5b	-82.4
NONRATT012710.2	ENSRNOT00000051349	ENSRNOG00000018714	Arl5b	-80.8
NONRATT011845.2	ENSRNOT00000051349	ENSRNOG00000018714	Arl5b	-82.3
NONRATT006496.2	ENSRNOT00000051349	ENSRNOG00000018714	Arl5b	-82
NONRATT005891.2	ENSRNOT00000051349	ENSRNOG00000018714	Arl5b	-78.8
NONRATT001051.2	ENSRNOT00000051349	ENSRNOG00000018714	Arl5b	-77.4
ENSRNOT00000089552	ENSRNOT00000051349	ENSRNOG00000018714	Arl5b	-82
ENSRNOT00000089288	ENSRNOT00000051349	ENSRNOG00000018714	Arl5b	-72.5
NONRATT025772.2	ENSRNOT00000013463	ENSRNOG00000010034	Asah1	-84.6
NONRATT023910.2	ENSRNOT00000013463	ENSRNOG00000010034	Asah1	-90.3
NONRATT023587.2	ENSRNOT00000013463	ENSRNOG00000010034	Asah1	-82.8
NONRATT017977.2	ENSRNOT00000013463	ENSRNOG00000010034	Asah1	-94.3
NONRATT014240.2	ENSRNOT00000013463	ENSRNOG00000010034	Asah1	-85.2
NONRATT008688.2	ENSRNOT00000013463	ENSRNOG00000010034	Asah1	-90.2
NONRATT004661.2	ENSRNOT00000013463	ENSRNOG00000010034	Asah1	-78.5
NONRATT000606.2	ENSRNOT00000013463	ENSRNOG00000010034	Asah1	-85.2
NONRATT030282.2	ENSRNOT00000028388	ENSRNOG00000036794	Asb16	-80.3
NONRATT027796.2	ENSRNOT00000028388	ENSRNOG00000036794	Asb16	-84.3
NONRATT021570.2	ENSRNOT00000028388	ENSRNOG00000036794	Asb16	-81.1
NONRATT028716.2	ENSRNOT00000088191	ENSRNOG00000059765	Asic1	-92.2
NONRATT021076.2	ENSRNOT00000088191	ENSRNOG00000059765	Asic1	-91.8
NONRATT017960.2	ENSRNOT00000088191	ENSRNOG00000059765	Asic1	-92.4
NONRATT014517.2	ENSRNOT00000088191	ENSRNOG00000059765	Asic1	-93
NONRATT012710.2	ENSRNOT00000088191	ENSRNOG00000059765	Asic1	-84.9
NONRATT006496.2	ENSRNOT00000088191	ENSRNOG00000059765	Asic1	-87.5
NONRATT005891.2	ENSRNOT00000088191	ENSRNOG00000059765	Asic1	-93.2
NONRATT001051.2	ENSRNOT00000088191	ENSRNOG00000059765	Asic1	-92.2
NONRATT029930.2	ENSRNOT00000092063	ENSRNOG00000010861	Atad1	-77
NONRATT010844.2	ENSRNOT00000092063	ENSRNOG00000010861	Atad1	-78.6
NONRATT029310.2	ENSRNOT00000089841	ENSRNOG00000003745	Atf3	-76
NONRATT025222.2	ENSRNOT00000089841	ENSRNOG00000003745	Atf3	-78.4
NONRATT017283.2	ENSRNOT00000089841	ENSRNOG00000003745	Atf3	-79.7
NONRATT010578.2	ENSRNOT00000089841	ENSRNOG00000003745	Atf3	-74.1
ENSRNOT00000089552	ENSRNOT00000089841	ENSRNOG00000003745	Atf3	-82.2
ENSRNOT00000089288	ENSRNOT00000089841	ENSRNOG00000003745	Atf3	-73
NONRATT028716.2	ENSRNOT00000091063	ENSRNOG00000006523	Atl2	-95.4
NONRATT026181.2	ENSRNOT00000091063	ENSRNOG00000006523	Atl2	-89
NONRATT021076.2	ENSRNOT00000091063	ENSRNOG00000006523	Atl2	-93.5
NONRATT018825.2	ENSRNOT00000091063	ENSRNOG00000006523	Atl2	-86.3
NONRATT017960.2	ENSRNOT00000091063	ENSRNOG00000006523	Atl2	-91.5
NONRATT014517.2	ENSRNOT00000091063	ENSRNOG00000006523	Atl2	-95.4
NONRATT013372.2	ENSRNOT00000091063	ENSRNOG00000006523	Atl2	-87.7
NONRATT012710.2	ENSRNOT00000091063	ENSRNOG00000006523	Atl2	-88.1
NONRATT011845.2	ENSRNOT00000091063	ENSRNOG00000006523	Atl2	-84.6
NONRATT006496.2	ENSRNOT00000091063	ENSRNOG00000006523	Atl2	-90.7
NONRATT005891.2	ENSRNOT00000091063	ENSRNOG00000006523	Atl2	-93.2
NONRATT001051.2	ENSRNOT00000091063	ENSRNOG00000006523	Atl2	-95.4
ENSRNOT00000089552	ENSRNOT00000091063	ENSRNOG00000006523	Atl2	-90.7
ENSRNOT00000089288	ENSRNOT00000091063	ENSRNOG00000006523	Atl2	-77.4
NONRATT028716.2	ENSRNOT00000024347	ENSRNOG00000001285	Atp2a2	-89.8
NONRATT026181.2	ENSRNOT00000024347	ENSRNOG00000001285	Atp2a2	-94.5
NONRATT018825.2	ENSRNOT00000024347	ENSRNOG00000001285	Atp2a2	-92
NONRATT017960.2	ENSRNOT00000024347	ENSRNOG00000001285	Atp2a2	-88.1
NONRATT014517.2	ENSRNOT00000024347	ENSRNOG00000001285	Atp2a2	-88.4
NONRATT013372.2	ENSRNOT00000024347	ENSRNOG00000001285	Atp2a2	-93.9
NONRATT012710.2	ENSRNOT00000024347	ENSRNOG00000001285	Atp2a2	-93.8
NONRATT011845.2	ENSRNOT00000024347	ENSRNOG00000001285	Atp2a2	-92.5
NONRATT006496.2	ENSRNOT00000024347	ENSRNOG00000001285	Atp2a2	-96.4
NONRATT005891.2	ENSRNOT00000024347	ENSRNOG00000001285	Atp2a2	-86
NONRATT001051.2	ENSRNOT00000024347	ENSRNOG00000001285	Atp2a2	-89.8
NONRATT025772.2	ENSRNOT00000089265	ENSRNOG00000012878	Atp7b	-85.7
NONRATT023910.2	ENSRNOT00000089265	ENSRNOG00000012878	Atp7b	-95.2
NONRATT023587.2	ENSRNOT00000089265	ENSRNOG00000012878	Atp7b	-87.8
NONRATT017977.2	ENSRNOT00000089265	ENSRNOG00000012878	Atp7b	-93.1
NONRATT014240.2	ENSRNOT00000089265	ENSRNOG00000012878	Atp7b	-88
NONRATT008688.2	ENSRNOT00000089265	ENSRNOG00000012878	Atp7b	-91.4
NONRATT004661.2	ENSRNOT00000089265	ENSRNOG00000012878	Atp7b	-84.8
NONRATT000606.2	ENSRNOT00000089265	ENSRNOG00000012878	Atp7b	-88
NONRATT028716.2	ENSRNOT00000013533	ENSRNOG00000010169	Atpaf1	-96.6
NONRATT028716.2	ENSRNOT00000087197	ENSRNOG00000010169	Atpaf1	-96.6
NONRATT026181.2	ENSRNOT00000087197	ENSRNOG00000010169	Atpaf1	-90
NONRATT026181.2	ENSRNOT00000013533	ENSRNOG00000010169	Atpaf1	-90
NONRATT018825.2	ENSRNOT00000087197	ENSRNOG00000010169	Atpaf1	-87.5
NONRATT018825.2	ENSRNOT00000013533	ENSRNOG00000010169	Atpaf1	-87.5
NONRATT017960.2	ENSRNOT00000013533	ENSRNOG00000010169	Atpaf1	-95.2
NONRATT017960.2	ENSRNOT00000087197	ENSRNOG00000010169	Atpaf1	-95.2
NONRATT014517.2	ENSRNOT00000013533	ENSRNOG00000010169	Atpaf1	-95.4
NONRATT014517.2	ENSRNOT00000087197	ENSRNOG00000010169	Atpaf1	-95.4
NONRATT013372.2	ENSRNOT00000087197	ENSRNOG00000010169	Atpaf1	-89.4
NONRATT013372.2	ENSRNOT00000013533	ENSRNOG00000010169	Atpaf1	-89.4
NONRATT012710.2	ENSRNOT00000013533	ENSRNOG00000010169	Atpaf1	-89.3
NONRATT012710.2	ENSRNOT00000087197	ENSRNOG00000010169	Atpaf1	-89.3
NONRATT011845.2	ENSRNOT00000013533	ENSRNOG00000010169	Atpaf1	-88.3
NONRATT011845.2	ENSRNOT00000087197	ENSRNOG00000010169	Atpaf1	-88.3
NONRATT006496.2	ENSRNOT00000013533	ENSRNOG00000010169	Atpaf1	-91.9
NONRATT006496.2	ENSRNOT00000087197	ENSRNOG00000010169	Atpaf1	-91.9
NONRATT005891.2	ENSRNOT00000087197	ENSRNOG00000010169	Atpaf1	-93.2
NONRATT005891.2	ENSRNOT00000013533	ENSRNOG00000010169	Atpaf1	-93.2
NONRATT001051.2	ENSRNOT00000013533	ENSRNOG00000010169	Atpaf1	-96.6
NONRATT001051.2	ENSRNOT00000087197	ENSRNOG00000010169	Atpaf1	-96.6
ENSRNOT00000089552	ENSRNOT00000087197	ENSRNOG00000010169	Atpaf1	-91.9
ENSRNOT00000089552	ENSRNOT00000013533	ENSRNOG00000010169	Atpaf1	-91.9
ENSRNOT00000089288	ENSRNOT00000087197	ENSRNOG00000010169	Atpaf1	-79.7
ENSRNOT00000089288	ENSRNOT00000013533	ENSRNOG00000010169	Atpaf1	-79.7
NONRATT025772.2	ENSRNOT00000091284	ENSRNOG00000056703	Atrx	-87
NONRATT023910.2	ENSRNOT00000091284	ENSRNOG00000056703	Atrx	-88.3
NONRATT023587.2	ENSRNOT00000091284	ENSRNOG00000056703	Atrx	-86.1
NONRATT017977.2	ENSRNOT00000091284	ENSRNOG00000056703	Atrx	-85.8
NONRATT014240.2	ENSRNOT00000091284	ENSRNOG00000056703	Atrx	-82.5
NONRATT008688.2	ENSRNOT00000091284	ENSRNOG00000056703	Atrx	-86.2
NONRATT004661.2	ENSRNOT00000091284	ENSRNOG00000056703	Atrx	-84.3
NONRATT000606.2	ENSRNOT00000091284	ENSRNOG00000056703	Atrx	-82.5
NONRATT030282.2	ENSRNOT00000091016	ENSRNOG00000005659	Aurkb	-72.2
NONRATT027796.2	ENSRNOT00000091016	ENSRNOG00000005659	Aurkb	-81.7
NONRATT021570.2	ENSRNOT00000091016	ENSRNOG00000005659	Aurkb	-78.1
NONRATT025772.2	ENSRNOT00000021764	ENSRNOG00000015895	B4galt6	-80.1
NONRATT023910.2	ENSRNOT00000021764	ENSRNOG00000015895	B4galt6	-79.7
NONRATT023587.2	ENSRNOT00000021764	ENSRNOG00000015895	B4galt6	-77.4
NONRATT017977.2	ENSRNOT00000021764	ENSRNOG00000015895	B4galt6	-78.9
NONRATT008688.2	ENSRNOT00000021764	ENSRNOG00000015895	B4galt6	-79.9
NONRATT004661.2	ENSRNOT00000021764	ENSRNOG00000015895	B4galt6	-75.6
NONRATT000606.2	ENSRNOT00000021764	ENSRNOG00000015895	B4galt6	-75.6
NONRATT014469.2	ENSRNOT00000026076	ENSRNOG00000019020	Bbs2	-100.1
NONRATT028716.2	ENSRNOT00000013279	ENSRNOG00000009826	Bche	-76.2
NONRATT026181.2	ENSRNOT00000013279	ENSRNOG00000009826	Bche	-86.9
NONRATT018825.2	ENSRNOT00000013279	ENSRNOG00000009826	Bche	-78.4
NONRATT017960.2	ENSRNOT00000013279	ENSRNOG00000009826	Bche	-74.8
NONRATT014517.2	ENSRNOT00000013279	ENSRNOG00000009826	Bche	-76.2
NONRATT013372.2	ENSRNOT00000013279	ENSRNOG00000009826	Bche	-79.8
NONRATT012710.2	ENSRNOT00000013279	ENSRNOG00000009826	Bche	-80.2
NONRATT011845.2	ENSRNOT00000013279	ENSRNOG00000009826	Bche	-76.5
NONRATT006496.2	ENSRNOT00000013279	ENSRNOG00000009826	Bche	-82.8
NONRATT005891.2	ENSRNOT00000013279	ENSRNOG00000009826	Bche	-74.4
NONRATT001051.2	ENSRNOT00000013279	ENSRNOG00000009826	Bche	-76.2
NONRATT028716.2	ENSRNOT00000007309	ENSRNOG00000005491	Best3	-95.4
NONRATT026181.2	ENSRNOT00000007309	ENSRNOG00000005491	Best3	-89
NONRATT017960.2	ENSRNOT00000007309	ENSRNOG00000005491	Best3	-91.5
NONRATT014517.2	ENSRNOT00000007309	ENSRNOG00000005491	Best3	-95.4
NONRATT013372.2	ENSRNOT00000007309	ENSRNOG00000005491	Best3	-87.7
NONRATT012710.2	ENSRNOT00000007309	ENSRNOG00000005491	Best3	-88.1
NONRATT011845.2	ENSRNOT00000007309	ENSRNOG00000005491	Best3	-84.6
NONRATT006496.2	ENSRNOT00000007309	ENSRNOG00000005491	Best3	-90.7
NONRATT005891.2	ENSRNOT00000007309	ENSRNOG00000005491	Best3	-93.2
NONRATT001051.2	ENSRNOT00000007309	ENSRNOG00000005491	Best3	-95.4
NONRATT027796.2	ENSRNOT00000016776	ENSRNOG00000012439	Bid	-81.1
NONRATT021570.2	ENSRNOT00000016776	ENSRNOG00000012439	Bid	-81.1
NONRATT017510.2	ENSRNOT00000016776	ENSRNOG00000012439	Bid	-78.5
NONRATT010218.2	ENSRNOT00000016776	ENSRNOG00000012439	Bid	-81.6
NONRATT030282.2	ENSRNOT00000014560	ENSRNOG00000010602	Birc2	-84.2
NONRATT027796.2	ENSRNOT00000014560	ENSRNOG00000010602	Birc2	-89.3
NONRATT021570.2	ENSRNOT00000014560	ENSRNOG00000010602	Birc2	-78.7
NONRATT028716.2	ENSRNOT00000015021	ENSRNOG00000010798	Blk	-88.4
NONRATT026181.2	ENSRNOT00000015021	ENSRNOG00000010798	Blk	-93.1
NONRATT021076.2	ENSRNOT00000015021	ENSRNOG00000010798	Blk	-86.7
NONRATT018825.2	ENSRNOT00000015021	ENSRNOG00000010798	Blk	-89.2
NONRATT017960.2	ENSRNOT00000015021	ENSRNOG00000010798	Blk	-88.4
NONRATT014517.2	ENSRNOT00000015021	ENSRNOG00000010798	Blk	-86.4
NONRATT013372.2	ENSRNOT00000015021	ENSRNOG00000010798	Blk	-92.8
NONRATT012710.2	ENSRNOT00000015021	ENSRNOG00000010798	Blk	-92.4
NONRATT011845.2	ENSRNOT00000015021	ENSRNOG00000010798	Blk	-92.8
NONRATT006496.2	ENSRNOT00000015021	ENSRNOG00000010798	Blk	-93.6
NONRATT005891.2	ENSRNOT00000015021	ENSRNOG00000010798	Blk	-86.6
NONRATT001051.2	ENSRNOT00000015021	ENSRNOG00000010798	Blk	-88.4
ENSRNOT00000089552	ENSRNOT00000015021	ENSRNOG00000010798	Blk	-93.5
ENSRNOT00000089288	ENSRNOT00000015021	ENSRNOG00000010798	Blk	-84.2
NONRATT025772.2	ENSRNOT00000031026	ENSRNOG00000024410	Blvrb	-80.9
NONRATT023910.2	ENSRNOT00000031026	ENSRNOG00000024410	Blvrb	-87.1
NONRATT023587.2	ENSRNOT00000031026	ENSRNOG00000024410	Blvrb	-90
NONRATT017977.2	ENSRNOT00000031026	ENSRNOG00000024410	Blvrb	-83.9
NONRATT014240.2	ENSRNOT00000031026	ENSRNOG00000024410	Blvrb	-92.2
NONRATT008688.2	ENSRNOT00000031026	ENSRNOG00000024410	Blvrb	-82.7
NONRATT004661.2	ENSRNOT00000031026	ENSRNOG00000024410	Blvrb	-87.5
NONRATT001442.2	ENSRNOT00000031026	ENSRNOG00000024410	Blvrb	-81.2
NONRATT000606.2	ENSRNOT00000031026	ENSRNOG00000024410	Blvrb	-92.8
NONRATT029310.2	ENSRNOT00000091172	ENSRNOG00000059997	Brip1	-77
NONRATT024782.2	ENSRNOT00000091172	ENSRNOG00000059997	Brip1	-76.9
NONRATT022043.2	ENSRNOT00000091172	ENSRNOG00000059997	Brip1	-70.2
NONRATT021770.2	ENSRNOT00000091172	ENSRNOG00000059997	Brip1	-66.4
NONRATT021035.2	ENSRNOT00000091172	ENSRNOG00000059997	Brip1	-73.1
NONRATT017283.2	ENSRNOT00000091172	ENSRNOG00000059997	Brip1	-85.9
NONRATT010578.2	ENSRNOT00000091172	ENSRNOG00000059997	Brip1	-70.3
ENSRNOT00000089552	ENSRNOT00000091172	ENSRNOG00000059997	Brip1	-81.8
ENSRNOT00000089288	ENSRNOT00000091172	ENSRNOG00000059997	Brip1	-76.6
NONRATT025772.2	ENSRNOT00000024465	ENSRNOG00000017938	Btaf1	-85.4
NONRATT023910.2	ENSRNOT00000024465	ENSRNOG00000017938	Btaf1	-93.5
NONRATT023587.2	ENSRNOT00000024465	ENSRNOG00000017938	Btaf1	-86
NONRATT017977.2	ENSRNOT00000024465	ENSRNOG00000017938	Btaf1	-91.3
NONRATT014240.2	ENSRNOT00000024465	ENSRNOG00000017938	Btaf1	-88.4
NONRATT008688.2	ENSRNOT00000024465	ENSRNOG00000017938	Btaf1	-89.6
NONRATT007757.2	ENSRNOT00000024465	ENSRNOG00000017938	Btaf1	-86.6
NONRATT004661.2	ENSRNOT00000024465	ENSRNOG00000017938	Btaf1	-80.8
NONRATT000606.2	ENSRNOT00000024465	ENSRNOG00000017938	Btaf1	-88.4
ENSRNOT00000078751	ENSRNOT00000024465	ENSRNOG00000017938	Btaf1	-87.4
NONRATT025772.2	ENSRNOT00000089875	ENSRNOG00000005982	C1d	-82.2
NONRATT023910.2	ENSRNOT00000089875	ENSRNOG00000005982	C1d	-89.6
NONRATT023587.2	ENSRNOT00000089875	ENSRNOG00000005982	C1d	-93.8
NONRATT017977.2	ENSRNOT00000089875	ENSRNOG00000005982	C1d	-87.4
NONRATT014240.2	ENSRNOT00000089875	ENSRNOG00000005982	C1d	-96.7
NONRATT008688.2	ENSRNOT00000089875	ENSRNOG00000005982	C1d	-85.7
NONRATT004661.2	ENSRNOT00000089875	ENSRNOG00000005982	C1d	-89.5
NONRATT000606.2	ENSRNOT00000089875	ENSRNOG00000005982	C1d	-96.7
NONRATT029310.2	ENSRNOT00000083490	ENSRNOG00000009719	C2cd2l	-68.7
NONRATT024782.2	ENSRNOT00000083490	ENSRNOG00000009719	C2cd2l	-77.8
ENSRNOT00000089288	ENSRNOT00000083490	ENSRNOG00000009719	C2cd2l	-70.9
NONRATT027796.2	ENSRNOT00000083078	ENSRNOG00000005840	Cacfd1	-81.1
NONRATT021570.2	ENSRNOT00000083078	ENSRNOG00000005840	Cacfd1	-81.1
NONRATT028716.2	ENSRNOT00000065644	ENSRNOG00000009783	Camk2g	-86.8
NONRATT026181.2	ENSRNOT00000065644	ENSRNOG00000009783	Camk2g	-91.5
NONRATT021076.2	ENSRNOT00000065644	ENSRNOG00000009783	Camk2g	-82.4
NONRATT018825.2	ENSRNOT00000065644	ENSRNOG00000009783	Camk2g	-89
NONRATT017960.2	ENSRNOT00000065644	ENSRNOG00000009783	Camk2g	-85.1
NONRATT013372.2	ENSRNOT00000065644	ENSRNOG00000009783	Camk2g	-90.9
NONRATT012710.2	ENSRNOT00000065644	ENSRNOG00000009783	Camk2g	-90.8
NONRATT011845.2	ENSRNOT00000065644	ENSRNOG00000009783	Camk2g	-89.8
NONRATT006496.2	ENSRNOT00000065644	ENSRNOG00000009783	Camk2g	-93.4
NONRATT005891.2	ENSRNOT00000065644	ENSRNOG00000009783	Camk2g	-83
NONRATT001051.2	ENSRNOT00000065644	ENSRNOG00000009783	Camk2g	-86.8
ENSRNOT00000089552	ENSRNOT00000065644	ENSRNOG00000009783	Camk2g	-93.4
ENSRNOT00000089288	ENSRNOT00000065644	ENSRNOG00000009783	Camk2g	-82.3
NONRATT027796.2	ENSRNOT00000025848	ENSRNOG00000019098	Car5a	-78.9
NONRATT021570.2	ENSRNOT00000025848	ENSRNOG00000019098	Car5a	-82.5
NONRATT025772.2	ENSRNOT00000023060	ENSRNOG00000017073	Car9	-75.5
NONRATT023910.2	ENSRNOT00000023060	ENSRNOG00000017073	Car9	-79.9
NONRATT023587.2	ENSRNOT00000023060	ENSRNOG00000017073	Car9	-77.8
NONRATT017977.2	ENSRNOT00000023060	ENSRNOG00000017073	Car9	-77.7
NONRATT014240.2	ENSRNOT00000023060	ENSRNOG00000017073	Car9	-75.1
NONRATT008688.2	ENSRNOT00000023060	ENSRNOG00000017073	Car9	-77.4
NONRATT004661.2	ENSRNOT00000023060	ENSRNOG00000017073	Car9	-75.5
NONRATT000606.2	ENSRNOT00000023060	ENSRNOG00000017073	Car9	-75.1
NONRATT028716.2	ENSRNOT00000078341	ENSRNOG00000002265	Casr	-86
NONRATT026181.2	ENSRNOT00000078341	ENSRNOG00000002265	Casr	-90.7
NONRATT021076.2	ENSRNOT00000078341	ENSRNOG00000002265	Casr	-84.3
NONRATT018825.2	ENSRNOT00000078341	ENSRNOG00000002265	Casr	-86.2
NONRATT017960.2	ENSRNOT00000078341	ENSRNOG00000002265	Casr	-86
NONRATT014517.2	ENSRNOT00000078341	ENSRNOG00000002265	Casr	-84
NONRATT013372.2	ENSRNOT00000078341	ENSRNOG00000002265	Casr	-90.4
NONRATT012710.2	ENSRNOT00000078341	ENSRNOG00000002265	Casr	-90
NONRATT011845.2	ENSRNOT00000078341	ENSRNOG00000002265	Casr	-90.4
NONRATT006496.2	ENSRNOT00000078341	ENSRNOG00000002265	Casr	-92.6
NONRATT005891.2	ENSRNOT00000078341	ENSRNOG00000002265	Casr	-84
NONRATT001051.2	ENSRNOT00000078341	ENSRNOG00000002265	Casr	-86
ENSRNOT00000089552	ENSRNOT00000078341	ENSRNOG00000002265	Casr	-89.8
ENSRNOT00000089288	ENSRNOT00000078341	ENSRNOG00000002265	Casr	-80.1
NONRATT025772.2	ENSRNOT00000035245	ENSRNOG00000021560	Cass4	-80.9
NONRATT023910.2	ENSRNOT00000035245	ENSRNOG00000021560	Cass4	-87.5
NONRATT023587.2	ENSRNOT00000035245	ENSRNOG00000021560	Cass4	-92.6
NONRATT017977.2	ENSRNOT00000035245	ENSRNOG00000021560	Cass4	-86.6
NONRATT014240.2	ENSRNOT00000035245	ENSRNOG00000021560	Cass4	-95.8
NONRATT008688.2	ENSRNOT00000035245	ENSRNOG00000021560	Cass4	-84.9
NONRATT004661.2	ENSRNOT00000035245	ENSRNOG00000021560	Cass4	-87.5
NONRATT000606.2	ENSRNOT00000035245	ENSRNOG00000021560	Cass4	-95.8
NONRATT028716.2	ENSRNOT00000023411	ENSRNOG00000017253	Ccdc107	-78.2
NONRATT014517.2	ENSRNOT00000023411	ENSRNOG00000017253	Ccdc107	-78.2
NONRATT011845.2	ENSRNOT00000023411	ENSRNOG00000017253	Ccdc107	-71.4
NONRATT006496.2	ENSRNOT00000023411	ENSRNOG00000017253	Ccdc107	-81.9
NONRATT005891.2	ENSRNOT00000023411	ENSRNOG00000017253	Ccdc107	-75.8
NONRATT028716.2	ENSRNOT00000056048	ENSRNOG00000007262	Ccdc134	-94.5
NONRATT026181.2	ENSRNOT00000056048	ENSRNOG00000007262	Ccdc134	-87.9
NONRATT018825.2	ENSRNOT00000056048	ENSRNOG00000007262	Ccdc134	-85.4
NONRATT017960.2	ENSRNOT00000056048	ENSRNOG00000007262	Ccdc134	-93.1
NONRATT014517.2	ENSRNOT00000056048	ENSRNOG00000007262	Ccdc134	-93.1
NONRATT013372.2	ENSRNOT00000056048	ENSRNOG00000007262	Ccdc134	-87.2
NONRATT012710.2	ENSRNOT00000056048	ENSRNOG00000007262	Ccdc134	-87.2
NONRATT011845.2	ENSRNOT00000056048	ENSRNOG00000007262	Ccdc134	-87.2
NONRATT006496.2	ENSRNOT00000056048	ENSRNOG00000007262	Ccdc134	-89.8
NONRATT005891.2	ENSRNOT00000056048	ENSRNOG00000007262	Ccdc134	-91.1
NONRATT001051.2	ENSRNOT00000056048	ENSRNOG00000007262	Ccdc134	-94.5
NONRATT029310.2	ENSRNOT00000072099	ENSRNOG00000048712	Ccdc137	-74
NONRATT021035.2	ENSRNOT00000072099	ENSRNOG00000048712	Ccdc137	-65.5
ENSRNOT00000089288	ENSRNOT00000072099	ENSRNOG00000048712	Ccdc137	-71.8
NONRATT007757.2	ENSRNOT00000084030	ENSRNOG00000039086	Ccdc153	-80.3
NONRATT007757.2	ENSRNOT00000059776	ENSRNOG00000039086	Ccdc153	-80.3
NONRATT027796.2	ENSRNOT00000013963	ENSRNOG00000010472	Ccdc32	-81.1
NONRATT021570.2	ENSRNOT00000013963	ENSRNOG00000010472	Ccdc32	-81.4
NONRATT028716.2	ENSRNOT00000004638	ENSRNOG00000003457	Ccdc64b	-89.8
NONRATT026181.2	ENSRNOT00000004638	ENSRNOG00000003457	Ccdc64b	-94.5
NONRATT021076.2	ENSRNOT00000004638	ENSRNOG00000003457	Ccdc64b	-86.7
NONRATT018825.2	ENSRNOT00000004638	ENSRNOG00000003457	Ccdc64b	-92
NONRATT017960.2	ENSRNOT00000004638	ENSRNOG00000003457	Ccdc64b	-88.4
NONRATT014517.2	ENSRNOT00000004638	ENSRNOG00000003457	Ccdc64b	-88.6
NONRATT013372.2	ENSRNOT00000004638	ENSRNOG00000003457	Ccdc64b	-93.9
NONRATT012710.2	ENSRNOT00000004638	ENSRNOG00000003457	Ccdc64b	-93.8
NONRATT011845.2	ENSRNOT00000004638	ENSRNOG00000003457	Ccdc64b	-92.8
NONRATT006496.2	ENSRNOT00000004638	ENSRNOG00000003457	Ccdc64b	-96.4
NONRATT005891.2	ENSRNOT00000004638	ENSRNOG00000003457	Ccdc64b	-86.4
NONRATT001051.2	ENSRNOT00000004638	ENSRNOG00000003457	Ccdc64b	-89.8
ENSRNOT00000089552	ENSRNOT00000004638	ENSRNOG00000003457	Ccdc64b	-96.4
ENSRNOT00000089288	ENSRNOT00000004638	ENSRNOG00000003457	Ccdc64b	-84.2
NONRATT028716.2	ENSRNOT00000077378	ENSRNOG00000031162	Ccl24	-86.5
NONRATT028716.2	ENSRNOT00000045157	ENSRNOG00000031162	Ccl24	-86.5
NONRATT026181.2	ENSRNOT00000077378	ENSRNOG00000031162	Ccl24	-87.8
NONRATT026181.2	ENSRNOT00000045157	ENSRNOG00000031162	Ccl24	-87.8
NONRATT021076.2	ENSRNOT00000045157	ENSRNOG00000031162	Ccl24	-84.5
NONRATT021076.2	ENSRNOT00000077378	ENSRNOG00000031162	Ccl24	-84.5
NONRATT018825.2	ENSRNOT00000077378	ENSRNOG00000031162	Ccl24	-79.4
NONRATT018825.2	ENSRNOT00000045157	ENSRNOG00000031162	Ccl24	-79.4
NONRATT017960.2	ENSRNOT00000045157	ENSRNOG00000031162	Ccl24	-86.5
NONRATT017960.2	ENSRNOT00000077378	ENSRNOG00000031162	Ccl24	-86.5
NONRATT014517.2	ENSRNOT00000077378	ENSRNOG00000031162	Ccl24	-84.5
NONRATT014517.2	ENSRNOT00000045157	ENSRNOG00000031162	Ccl24	-84.5
NONRATT013372.2	ENSRNOT00000045157	ENSRNOG00000031162	Ccl24	-86.1
NONRATT013372.2	ENSRNOT00000077378	ENSRNOG00000031162	Ccl24	-86.1
NONRATT012710.2	ENSRNOT00000077378	ENSRNOG00000031162	Ccl24	-83.1
NONRATT012710.2	ENSRNOT00000045157	ENSRNOG00000031162	Ccl24	-83.1
NONRATT011845.2	ENSRNOT00000077378	ENSRNOG00000031162	Ccl24	-84.4
NONRATT011845.2	ENSRNOT00000045157	ENSRNOG00000031162	Ccl24	-84.4
NONRATT006496.2	ENSRNOT00000045157	ENSRNOG00000031162	Ccl24	-80.4
NONRATT006496.2	ENSRNOT00000077378	ENSRNOG00000031162	Ccl24	-80.4
NONRATT005891.2	ENSRNOT00000077378	ENSRNOG00000031162	Ccl24	-86.3
NONRATT005891.2	ENSRNOT00000045157	ENSRNOG00000031162	Ccl24	-86.3
NONRATT001051.2	ENSRNOT00000077378	ENSRNOG00000031162	Ccl24	-85.3
NONRATT001051.2	ENSRNOT00000045157	ENSRNOG00000031162	Ccl24	-85.3
ENSRNOT00000089552	ENSRNOT00000077378	ENSRNOG00000031162	Ccl24	-80.4
ENSRNOT00000089552	ENSRNOT00000045157	ENSRNOG00000031162	Ccl24	-80.4
ENSRNOT00000089288	ENSRNOT00000045157	ENSRNOG00000031162	Ccl24	-74
ENSRNOT00000089288	ENSRNOT00000077378	ENSRNOG00000031162	Ccl24	-74
NONRATT029310.2	ENSRNOT00000084486	ENSRNOG00000059640	Ccl28	-73.6
NONRATT029310.2	ENSRNOT00000082614	ENSRNOG00000059640	Ccl28	-73.6
NONRATT024782.2	ENSRNOT00000084486	ENSRNOG00000059640	Ccl28	-74.1
NONRATT024782.2	ENSRNOT00000082614	ENSRNOG00000059640	Ccl28	-74.1
NONRATT010578.2	ENSRNOT00000084486	ENSRNOG00000059640	Ccl28	-68.6
NONRATT010578.2	ENSRNOT00000082614	ENSRNOG00000059640	Ccl28	-68.6
ENSRNOT00000089288	ENSRNOT00000084486	ENSRNOG00000059640	Ccl28	-74.9
ENSRNOT00000089288	ENSRNOT00000082614	ENSRNOG00000059640	Ccl28	-74.9
NONRATT025772.2	ENSRNOT00000029184	ENSRNOG00000028548	Ccl9	-80.3
NONRATT023910.2	ENSRNOT00000029184	ENSRNOG00000028548	Ccl9	-87.7
NONRATT023587.2	ENSRNOT00000029184	ENSRNOG00000028548	Ccl9	-91.5
NONRATT017977.2	ENSRNOT00000029184	ENSRNOG00000028548	Ccl9	-85.5
NONRATT014240.2	ENSRNOT00000029184	ENSRNOG00000028548	Ccl9	-93.9
NONRATT008688.2	ENSRNOT00000029184	ENSRNOG00000028548	Ccl9	-83.8
NONRATT004661.2	ENSRNOT00000029184	ENSRNOG00000028548	Ccl9	-84.7
NONRATT000606.2	ENSRNOT00000029184	ENSRNOG00000028548	Ccl9	-93.9
NONRATT028716.2	ENSRNOT00000082774	ENSRNOG00000049115	Ccr5	-89.8
NONRATT026181.2	ENSRNOT00000082774	ENSRNOG00000049115	Ccr5	-94.5
NONRATT021076.2	ENSRNOT00000082774	ENSRNOG00000049115	Ccr5	-86.7
NONRATT018825.2	ENSRNOT00000082774	ENSRNOG00000049115	Ccr5	-92
NONRATT017960.2	ENSRNOT00000082774	ENSRNOG00000049115	Ccr5	-88.4
NONRATT014517.2	ENSRNOT00000082774	ENSRNOG00000049115	Ccr5	-88.6
NONRATT013372.2	ENSRNOT00000082774	ENSRNOG00000049115	Ccr5	-93.9
NONRATT012710.2	ENSRNOT00000082774	ENSRNOG00000049115	Ccr5	-93.8
NONRATT011845.2	ENSRNOT00000082774	ENSRNOG00000049115	Ccr5	-92.8
NONRATT006496.2	ENSRNOT00000082774	ENSRNOG00000049115	Ccr5	-96.4
NONRATT005891.2	ENSRNOT00000082774	ENSRNOG00000049115	Ccr5	-86.4
NONRATT001051.2	ENSRNOT00000082774	ENSRNOG00000049115	Ccr5	-89.8
ENSRNOT00000089552	ENSRNOT00000082774	ENSRNOG00000049115	Ccr5	-96.4
ENSRNOT00000089288	ENSRNOT00000082774	ENSRNOG00000049115	Ccr5	-84.2
NONRATT021570.2	ENSRNOT00000008269	ENSRNOG00000006311	Ccr9	-78
NONRATT025772.2	ENSRNOT00000023977	ENSRNOG00000017819	Cd14	-78
NONRATT023910.2	ENSRNOT00000023977	ENSRNOG00000017819	Cd14	-85.3
NONRATT023587.2	ENSRNOT00000023977	ENSRNOG00000017819	Cd14	-86.1
NONRATT017977.2	ENSRNOT00000023977	ENSRNOG00000017819	Cd14	-83.2
NONRATT014240.2	ENSRNOT00000023977	ENSRNOG00000017819	Cd14	-83.5
NONRATT008688.2	ENSRNOT00000023977	ENSRNOG00000017819	Cd14	-83.7
NONRATT004661.2	ENSRNOT00000023977	ENSRNOG00000017819	Cd14	-84.6
NONRATT000606.2	ENSRNOT00000023977	ENSRNOG00000017819	Cd14	-83.5
NONRATT028716.2	ENSRNOT00000070958	ENSRNOG00000003298	Cd247	-90
NONRATT028716.2	ENSRNOT00000004403	ENSRNOG00000003298	Cd247	-90
NONRATT026181.2	ENSRNOT00000070958	ENSRNOG00000003298	Cd247	-89.4
NONRATT026181.2	ENSRNOT00000004403	ENSRNOG00000003298	Cd247	-89.4
NONRATT021076.2	ENSRNOT00000070958	ENSRNOG00000003298	Cd247	-88.1
NONRATT021076.2	ENSRNOT00000004403	ENSRNOG00000003298	Cd247	-88.1
NONRATT018825.2	ENSRNOT00000070958	ENSRNOG00000003298	Cd247	-80.9
NONRATT018825.2	ENSRNOT00000004403	ENSRNOG00000003298	Cd247	-80.9
NONRATT017960.2	ENSRNOT00000070958	ENSRNOG00000003298	Cd247	-86.1
NONRATT017960.2	ENSRNOT00000004403	ENSRNOG00000003298	Cd247	-86.1
NONRATT014517.2	ENSRNOT00000004403	ENSRNOG00000003298	Cd247	-90
NONRATT014517.2	ENSRNOT00000070958	ENSRNOG00000003298	Cd247	-90
NONRATT013372.2	ENSRNOT00000070958	ENSRNOG00000003298	Cd247	-82.3
NONRATT013372.2	ENSRNOT00000004403	ENSRNOG00000003298	Cd247	-82.3
NONRATT012710.2	ENSRNOT00000004403	ENSRNOG00000003298	Cd247	-82.7
NONRATT012710.2	ENSRNOT00000070958	ENSRNOG00000003298	Cd247	-82.7
NONRATT011845.2	ENSRNOT00000004403	ENSRNOG00000003298	Cd247	-79.2
NONRATT011845.2	ENSRNOT00000070958	ENSRNOG00000003298	Cd247	-79.2
NONRATT006496.2	ENSRNOT00000004403	ENSRNOG00000003298	Cd247	-85.3
NONRATT006496.2	ENSRNOT00000070958	ENSRNOG00000003298	Cd247	-85.3
NONRATT005891.2	ENSRNOT00000004403	ENSRNOG00000003298	Cd247	-87.8
NONRATT005891.2	ENSRNOT00000070958	ENSRNOG00000003298	Cd247	-87.8
NONRATT001051.2	ENSRNOT00000004403	ENSRNOG00000003298	Cd247	-90
NONRATT001051.2	ENSRNOT00000070958	ENSRNOG00000003298	Cd247	-90
ENSRNOT00000089288	ENSRNOT00000004403	ENSRNOG00000003298	Cd247	-72
ENSRNOT00000089288	ENSRNOT00000070958	ENSRNOG00000003298	Cd247	-72
NONRATT028716.2	ENSRNOT00000034266	ENSRNOG00000016825	Cd3eap	-89.8
NONRATT026181.2	ENSRNOT00000034266	ENSRNOG00000016825	Cd3eap	-94.5
NONRATT021076.2	ENSRNOT00000034266	ENSRNOG00000016825	Cd3eap	-86.7
NONRATT018825.2	ENSRNOT00000034266	ENSRNOG00000016825	Cd3eap	-92
NONRATT017960.2	ENSRNOT00000034266	ENSRNOG00000016825	Cd3eap	-88.4
NONRATT014517.2	ENSRNOT00000034266	ENSRNOG00000016825	Cd3eap	-88.6
NONRATT013372.2	ENSRNOT00000034266	ENSRNOG00000016825	Cd3eap	-93.9
NONRATT012710.2	ENSRNOT00000034266	ENSRNOG00000016825	Cd3eap	-93.8
NONRATT006496.2	ENSRNOT00000034266	ENSRNOG00000016825	Cd3eap	-96.4
NONRATT005891.2	ENSRNOT00000034266	ENSRNOG00000016825	Cd3eap	-86.4
NONRATT001051.2	ENSRNOT00000034266	ENSRNOG00000016825	Cd3eap	-89.8
ENSRNOT00000089552	ENSRNOT00000034266	ENSRNOG00000016825	Cd3eap	-96.4
ENSRNOT00000089288	ENSRNOT00000034266	ENSRNOG00000016825	Cd3eap	-84.2
NONRATT029310.2	ENSRNOT00000089625	ENSRNOG00000001527	Cd80	-78.6
NONRATT025772.2	ENSRNOT00000089625	ENSRNOG00000001527	Cd80	-82.7
NONRATT024782.2	ENSRNOT00000089625	ENSRNOG00000001527	Cd80	-79.4
NONRATT023910.2	ENSRNOT00000089625	ENSRNOG00000001527	Cd80	-90.8
NONRATT023587.2	ENSRNOT00000089625	ENSRNOG00000001527	Cd80	-83.3
NONRATT017977.2	ENSRNOT00000089625	ENSRNOG00000001527	Cd80	-88.6
NONRATT014240.2	ENSRNOT00000089625	ENSRNOG00000001527	Cd80	-85.7
NONRATT008688.2	ENSRNOT00000089625	ENSRNOG00000001527	Cd80	-86.9
NONRATT004661.2	ENSRNOT00000089625	ENSRNOG00000001527	Cd80	-80.9
NONRATT000606.2	ENSRNOT00000089625	ENSRNOG00000001527	Cd80	-85.7
ENSRNOT00000089552	ENSRNOT00000089625	ENSRNOG00000001527	Cd80	-80.1
ENSRNOT00000089288	ENSRNOT00000089625	ENSRNOG00000001527	Cd80	-76.5
NONRATT025772.2	ENSRNOT00000033017	ENSRNOG00000018999	Cdc14b	-86.6
NONRATT023910.2	ENSRNOT00000033017	ENSRNOG00000018999	Cdc14b	-92.6
NONRATT023587.2	ENSRNOT00000033017	ENSRNOG00000018999	Cdc14b	-86.8
NONRATT017977.2	ENSRNOT00000033017	ENSRNOG00000018999	Cdc14b	-91.4
NONRATT014240.2	ENSRNOT00000033017	ENSRNOG00000018999	Cdc14b	-88.5
NONRATT008688.2	ENSRNOT00000033017	ENSRNOG00000018999	Cdc14b	-91.3
NONRATT004661.2	ENSRNOT00000033017	ENSRNOG00000018999	Cdc14b	-84.8
NONRATT000606.2	ENSRNOT00000033017	ENSRNOG00000018999	Cdc14b	-88.5
NONRATT027796.2	ENSRNOT00000079949	ENSRNOG00000033426	Cdc37	-80.9
NONRATT021570.2	ENSRNOT00000079949	ENSRNOG00000033426	Cdc37	-77
NONRATT017510.2	ENSRNOT00000079949	ENSRNOG00000033426	Cdc37	-78.5
NONRATT007757.2	ENSRNOT00000079949	ENSRNOG00000033426	Cdc37	-82.3
NONRATT028716.2	ENSRNOT00000038228	ENSRNOG00000027787	Cdc6	-95.4
NONRATT028716.2	ENSRNOT00000081424	ENSRNOG00000027787	Cdc6	-95.4
NONRATT026181.2	ENSRNOT00000081424	ENSRNOG00000027787	Cdc6	-89
NONRATT026181.2	ENSRNOT00000038228	ENSRNOG00000027787	Cdc6	-89
NONRATT021076.2	ENSRNOT00000038228	ENSRNOG00000027787	Cdc6	-93.5
NONRATT021076.2	ENSRNOT00000081424	ENSRNOG00000027787	Cdc6	-93.5
NONRATT018825.2	ENSRNOT00000038228	ENSRNOG00000027787	Cdc6	-86.3
NONRATT018825.2	ENSRNOT00000081424	ENSRNOG00000027787	Cdc6	-86.3
NONRATT017960.2	ENSRNOT00000081424	ENSRNOG00000027787	Cdc6	-91.5
NONRATT017960.2	ENSRNOT00000038228	ENSRNOG00000027787	Cdc6	-91.5
NONRATT014517.2	ENSRNOT00000038228	ENSRNOG00000027787	Cdc6	-95.4
NONRATT014517.2	ENSRNOT00000081424	ENSRNOG00000027787	Cdc6	-95.4
NONRATT013372.2	ENSRNOT00000038228	ENSRNOG00000027787	Cdc6	-87.7
NONRATT013372.2	ENSRNOT00000081424	ENSRNOG00000027787	Cdc6	-87.7
NONRATT012710.2	ENSRNOT00000081424	ENSRNOG00000027787	Cdc6	-88.1
NONRATT012710.2	ENSRNOT00000038228	ENSRNOG00000027787	Cdc6	-88.1
NONRATT011845.2	ENSRNOT00000038228	ENSRNOG00000027787	Cdc6	-84.6
NONRATT011845.2	ENSRNOT00000081424	ENSRNOG00000027787	Cdc6	-84.6
NONRATT006496.2	ENSRNOT00000038228	ENSRNOG00000027787	Cdc6	-90.7
NONRATT006496.2	ENSRNOT00000081424	ENSRNOG00000027787	Cdc6	-90.7
NONRATT005891.2	ENSRNOT00000038228	ENSRNOG00000027787	Cdc6	-93.2
NONRATT005891.2	ENSRNOT00000081424	ENSRNOG00000027787	Cdc6	-93.2
NONRATT001051.2	ENSRNOT00000038228	ENSRNOG00000027787	Cdc6	-95.4
NONRATT001051.2	ENSRNOT00000081424	ENSRNOG00000027787	Cdc6	-95.4
ENSRNOT00000089552	ENSRNOT00000038228	ENSRNOG00000027787	Cdc6	-90.7
ENSRNOT00000089552	ENSRNOT00000081424	ENSRNOG00000027787	Cdc6	-90.7
ENSRNOT00000089288	ENSRNOT00000038228	ENSRNOG00000027787	Cdc6	-77.4
ENSRNOT00000089288	ENSRNOT00000081424	ENSRNOG00000027787	Cdc6	-77.4
NONRATT025428.2	ENSRNOT00000064868	ENSRNOG00000005410	Cdca7l	-94.4
NONRATT027796.2	ENSRNOT00000044628	ENSRNOG00000029841	Cdh19	-83.9
NONRATT021570.2	ENSRNOT00000044628	ENSRNOG00000029841	Cdh19	-79.9
NONRATT028716.2	ENSRNOT00000006374	ENSRNOG00000038720	Cdkl1	-96.6
NONRATT026181.2	ENSRNOT00000006374	ENSRNOG00000038720	Cdkl1	-86.7
NONRATT021076.2	ENSRNOT00000006374	ENSRNOG00000038720	Cdkl1	-93.5
NONRATT018825.2	ENSRNOT00000006374	ENSRNOG00000038720	Cdkl1	-87.5
NONRATT017960.2	ENSRNOT00000006374	ENSRNOG00000038720	Cdkl1	-95.2
NONRATT014517.2	ENSRNOT00000006374	ENSRNOG00000038720	Cdkl1	-95.2
NONRATT013372.2	ENSRNOT00000006374	ENSRNOG00000038720	Cdkl1	-89.4
NONRATT012710.2	ENSRNOT00000006374	ENSRNOG00000038720	Cdkl1	-89.3
NONRATT011845.2	ENSRNOT00000006374	ENSRNOG00000038720	Cdkl1	-88.3
NONRATT006496.2	ENSRNOT00000006374	ENSRNOG00000038720	Cdkl1	-91.9
NONRATT005891.2	ENSRNOT00000006374	ENSRNOG00000038720	Cdkl1	-93.2
NONRATT001051.2	ENSRNOT00000006374	ENSRNOG00000038720	Cdkl1	-96.6
ENSRNOT00000089552	ENSRNOT00000006374	ENSRNOG00000038720	Cdkl1	-91.9
ENSRNOT00000089288	ENSRNOT00000006374	ENSRNOG00000038720	Cdkl1	-79.7
NONRATT025772.2	ENSRNOT00000035865	ENSRNOG00000025815	Cdr2l	-85.2
NONRATT023910.2	ENSRNOT00000035865	ENSRNOG00000025815	Cdr2l	-91.2
NONRATT023587.2	ENSRNOT00000035865	ENSRNOG00000025815	Cdr2l	-84.9
NONRATT017977.2	ENSRNOT00000035865	ENSRNOG00000025815	Cdr2l	-89.1
NONRATT008688.2	ENSRNOT00000035865	ENSRNOG00000025815	Cdr2l	-89.4
NONRATT004661.2	ENSRNOT00000035865	ENSRNOG00000025815	Cdr2l	-82.9
NONRATT000606.2	ENSRNOT00000035865	ENSRNOG00000025815	Cdr2l	-85.1
ENSRNOT00000078751	ENSRNOT00000035865	ENSRNOG00000025815	Cdr2l	-80
NONRATT027796.2	ENSRNOT00000071271	ENSRNOG00000046915	Ceacam9	-81.1
NONRATT021570.2	ENSRNOT00000071271	ENSRNOG00000046915	Ceacam9	-81.1
NONRATT017510.2	ENSRNOT00000071271	ENSRNOG00000046915	Ceacam9	-77.5
NONRATT023910.2	ENSRNOT00000065677	ENSRNOG00000042944	Cenpw	-95.2
NONRATT023587.2	ENSRNOT00000065677	ENSRNOG00000042944	Cenpw	-87.8
NONRATT017977.2	ENSRNOT00000065677	ENSRNOG00000042944	Cenpw	-93.1
NONRATT014240.2	ENSRNOT00000065677	ENSRNOG00000042944	Cenpw	-88.7
NONRATT008688.2	ENSRNOT00000065677	ENSRNOG00000042944	Cenpw	-91.4
NONRATT004661.2	ENSRNOT00000065677	ENSRNOG00000042944	Cenpw	-83
NONRATT000606.2	ENSRNOT00000065677	ENSRNOG00000042944	Cenpw	-88.7
ENSRNOT00000078751	ENSRNOT00000065677	ENSRNOG00000042944	Cenpw	-82.2
NONRATT027443.2	ENSRNOT00000078372	ENSRNOG00000010999	Cep295	-52.4
NONRATT027443.2	ENSRNOT00000083011	ENSRNOG00000010999	Cep295	-77.9
NONRATT027796.2	ENSRNOT00000019072	ENSRNOG00000039079	Ces2h	-74.5
NONRATT021570.2	ENSRNOT00000019072	ENSRNOG00000039079	Ces2h	-76.4
NONRATT027796.2	ENSRNOT00000067892	ENSRNOG00000011268	Chd5	-86.6
NONRATT021570.2	ENSRNOT00000067892	ENSRNOG00000011268	Chd5	-83.3
NONRATT025772.2	ENSRNOT00000085591	ENSRNOG00000037509	Chek2	-84.6
NONRATT023910.2	ENSRNOT00000085591	ENSRNOG00000037509	Chek2	-91.3
NONRATT023587.2	ENSRNOT00000085591	ENSRNOG00000037509	Chek2	-86.8
NONRATT017977.2	ENSRNOT00000085591	ENSRNOG00000037509	Chek2	-94.3
NONRATT014240.2	ENSRNOT00000085591	ENSRNOG00000037509	Chek2	-85.2
NONRATT008688.2	ENSRNOT00000085591	ENSRNOG00000037509	Chek2	-91.3
NONRATT004661.2	ENSRNOT00000085591	ENSRNOG00000037509	Chek2	-84.8
NONRATT000606.2	ENSRNOT00000085591	ENSRNOG00000037509	Chek2	-85.2
NONRATT028716.2	ENSRNOT00000076490	ENSRNOG00000037919	Chic1	-87.7
NONRATT026181.2	ENSRNOT00000076490	ENSRNOG00000037919	Chic1	-92.4
NONRATT018825.2	ENSRNOT00000076490	ENSRNOG00000037919	Chic1	-89.9
NONRATT017960.2	ENSRNOT00000076490	ENSRNOG00000037919	Chic1	-86
NONRATT014517.2	ENSRNOT00000076490	ENSRNOG00000037919	Chic1	-86.5
NONRATT013372.2	ENSRNOT00000076490	ENSRNOG00000037919	Chic1	-91.5
NONRATT012710.2	ENSRNOT00000076490	ENSRNOG00000037919	Chic1	-91.7
NONRATT011845.2	ENSRNOT00000076490	ENSRNOG00000037919	Chic1	-90.1
NONRATT006496.2	ENSRNOT00000076490	ENSRNOG00000037919	Chic1	-94.3
NONRATT005891.2	ENSRNOT00000076490	ENSRNOG00000037919	Chic1	-83.9
NONRATT001051.2	ENSRNOT00000076490	ENSRNOG00000037919	Chic1	-87.7
ENSRNOT00000089552	ENSRNOT00000076490	ENSRNOG00000037919	Chic1	-94.3
NONRATT027796.2	ENSRNOT00000024706	ENSRNOG00000018286	Chrna1	-79.6
NONRATT021570.2	ENSRNOT00000024706	ENSRNOG00000018286	Chrna1	-74.6
NONRATT017510.2	ENSRNOT00000024706	ENSRNOG00000018286	Chrna1	-71
NONRATT028716.2	ENSRNOT00000065771	ENSRNOG00000013610	Chrna5	-95.4
NONRATT026181.2	ENSRNOT00000065771	ENSRNOG00000013610	Chrna5	-89
NONRATT021076.2	ENSRNOT00000065771	ENSRNOG00000013610	Chrna5	-93.5
NONRATT018825.2	ENSRNOT00000065771	ENSRNOG00000013610	Chrna5	-86.3
NONRATT017960.2	ENSRNOT00000065771	ENSRNOG00000013610	Chrna5	-91.5
NONRATT014517.2	ENSRNOT00000065771	ENSRNOG00000013610	Chrna5	-95.4
NONRATT013372.2	ENSRNOT00000065771	ENSRNOG00000013610	Chrna5	-87.7
NONRATT012710.2	ENSRNOT00000065771	ENSRNOG00000013610	Chrna5	-88.1
NONRATT011845.2	ENSRNOT00000065771	ENSRNOG00000013610	Chrna5	-84.6
NONRATT006496.2	ENSRNOT00000065771	ENSRNOG00000013610	Chrna5	-90.7
NONRATT005891.2	ENSRNOT00000065771	ENSRNOG00000013610	Chrna5	-93.2
NONRATT001051.2	ENSRNOT00000065771	ENSRNOG00000013610	Chrna5	-95.4
ENSRNOT00000089552	ENSRNOT00000065771	ENSRNOG00000013610	Chrna5	-90.7
ENSRNOT00000089288	ENSRNOT00000065771	ENSRNOG00000013610	Chrna5	-77.4
NONRATT021570.2	ENSRNOT00000000697	ENSRNOG00000000572	Chst3	-74.3
NONRATT028716.2	ENSRNOT00000022749	ENSRNOG00000016953	Chst4	-80.8
NONRATT026181.2	ENSRNOT00000022749	ENSRNOG00000016953	Chst4	-80.7
NONRATT018825.2	ENSRNOT00000022749	ENSRNOG00000016953	Chst4	-82.1
NONRATT017960.2	ENSRNOT00000022749	ENSRNOG00000016953	Chst4	-80.8
NONRATT013372.2	ENSRNOT00000022749	ENSRNOG00000016953	Chst4	-82.9
NONRATT012710.2	ENSRNOT00000022749	ENSRNOG00000016953	Chst4	-82.9
NONRATT011845.2	ENSRNOT00000022749	ENSRNOG00000016953	Chst4	-82.9
NONRATT006496.2	ENSRNOT00000022749	ENSRNOG00000016953	Chst4	-82.5
NONRATT001051.2	ENSRNOT00000022749	ENSRNOG00000016953	Chst4	-80.1
NONRATT028716.2	ENSRNOT00000027612	ENSRNOG00000020377	Cideb	-90.4
NONRATT026181.2	ENSRNOT00000027612	ENSRNOG00000020377	Cideb	-87
NONRATT021076.2	ENSRNOT00000027612	ENSRNOG00000020377	Cideb	-83.4
NONRATT018825.2	ENSRNOT00000027612	ENSRNOG00000020377	Cideb	-80.7
NONRATT017960.2	ENSRNOT00000027612	ENSRNOG00000020377	Cideb	-90.4
NONRATT014517.2	ENSRNOT00000027612	ENSRNOG00000020377	Cideb	-88.4
NONRATT013372.2	ENSRNOT00000027612	ENSRNOG00000020377	Cideb	-86.1
NONRATT012710.2	ENSRNOT00000027612	ENSRNOG00000020377	Cideb	-85.7
NONRATT011845.2	ENSRNOT00000027612	ENSRNOG00000020377	Cideb	-86
NONRATT006496.2	ENSRNOT00000027612	ENSRNOG00000020377	Cideb	-80.6
NONRATT005891.2	ENSRNOT00000027612	ENSRNOG00000020377	Cideb	-88.4
NONRATT001051.2	ENSRNOT00000027612	ENSRNOG00000020377	Cideb	-88.1
ENSRNOT00000089552	ENSRNOT00000027612	ENSRNOG00000020377	Cideb	-79.3
ENSRNOT00000089288	ENSRNOT00000027612	ENSRNOG00000020377	Cideb	-75.1
NONRATT025772.2	ENSRNOT00000074632	ENSRNOG00000048258	Cisd2	-80.3
NONRATT023910.2	ENSRNOT00000074632	ENSRNOG00000048258	Cisd2	-80.1
NONRATT023587.2	ENSRNOT00000074632	ENSRNOG00000048258	Cisd2	-86.1
NONRATT017977.2	ENSRNOT00000074632	ENSRNOG00000048258	Cisd2	-78.4
NONRATT014240.2	ENSRNOT00000074632	ENSRNOG00000048258	Cisd2	-86.4
NONRATT008688.2	ENSRNOT00000074632	ENSRNOG00000048258	Cisd2	-79.3
NONRATT004661.2	ENSRNOT00000074632	ENSRNOG00000048258	Cisd2	-86.3
NONRATT000606.2	ENSRNOT00000074632	ENSRNOG00000048258	Cisd2	-86.4
NONRATT027796.2	ENSRNOT00000055533	ENSRNOG00000042561	Cks1b	-74.6
NONRATT025772.2	ENSRNOT00000025342	ENSRNOG00000018752	Clcf1	-79
NONRATT023910.2	ENSRNOT00000025342	ENSRNOG00000018752	Clcf1	-85.6
NONRATT023587.2	ENSRNOT00000025342	ENSRNOG00000018752	Clcf1	-90.7
NONRATT017977.2	ENSRNOT00000025342	ENSRNOG00000018752	Clcf1	-84.7
NONRATT014240.2	ENSRNOT00000025342	ENSRNOG00000018752	Clcf1	-93.9
NONRATT008688.2	ENSRNOT00000025342	ENSRNOG00000018752	Clcf1	-83
NONRATT004661.2	ENSRNOT00000025342	ENSRNOG00000018752	Clcf1	-84.1
NONRATT001442.2	ENSRNOT00000025342	ENSRNOG00000018752	Clcf1	-86
NONRATT000606.2	ENSRNOT00000025342	ENSRNOG00000018752	Clcf1	-93.9
NONRATT025772.2	ENSRNOT00000001923	ENSRNOG00000001419	Cldn15	-79.6
NONRATT023910.2	ENSRNOT00000001923	ENSRNOG00000001419	Cldn15	-85.1
NONRATT023587.2	ENSRNOT00000001923	ENSRNOG00000001419	Cldn15	-88.9
NONRATT017977.2	ENSRNOT00000001923	ENSRNOG00000001419	Cldn15	-85.8
NONRATT014240.2	ENSRNOT00000001923	ENSRNOG00000001419	Cldn15	-91.4
NONRATT008688.2	ENSRNOT00000001923	ENSRNOG00000001419	Cldn15	-83.1
NONRATT004661.2	ENSRNOT00000001923	ENSRNOG00000001419	Cldn15	-85
NONRATT001442.2	ENSRNOT00000001923	ENSRNOG00000001419	Cldn15	-87.9
NONRATT000606.2	ENSRNOT00000001923	ENSRNOG00000001419	Cldn15	-91.4
NONRATT018825.2	ENSRNOT00000027086	ENSRNOG00000019992	Cnbd2	-93.2
NONRATT021570.2	ENSRNOT00000066396	ENSRNOG00000004909	Cnot2	-74.9
ENSRNOT00000088061	ENSRNOT00000038764	ENSRNOG00000025385	Coa4	-76.2
NONRATT025772.2	ENSRNOT00000024366	ENSRNOG00000018102	Coa5	-82.2
NONRATT023910.2	ENSRNOT00000024366	ENSRNOG00000018102	Coa5	-87.5
NONRATT023587.2	ENSRNOT00000024366	ENSRNOG00000018102	Coa5	-87.3
NONRATT017977.2	ENSRNOT00000024366	ENSRNOG00000018102	Coa5	-85.3
NONRATT014240.2	ENSRNOT00000024366	ENSRNOG00000018102	Coa5	-81.7
NONRATT008688.2	ENSRNOT00000024366	ENSRNOG00000018102	Coa5	-87.5
NONRATT004661.2	ENSRNOT00000024366	ENSRNOG00000018102	Coa5	-78.1
NONRATT000606.2	ENSRNOT00000024366	ENSRNOG00000018102	Coa5	-81.7
NONRATT027796.2	ENSRNOT00000057830	ENSRNOG00000038012	Commd6	-77.5
NONRATT021570.2	ENSRNOT00000057830	ENSRNOG00000038012	Commd6	-82.8
NONRATT017510.2	ENSRNOT00000057830	ENSRNOG00000038012	Commd6	-72.4
NONRATT010218.2	ENSRNOT00000057830	ENSRNOG00000038012	Commd6	-78.9
NONRATT025772.2	ENSRNOT00000002987	ENSRNOG00000002194	Coq2	-88.1
NONRATT023910.2	ENSRNOT00000002987	ENSRNOG00000002194	Coq2	-96.2
NONRATT023587.2	ENSRNOT00000002987	ENSRNOG00000002194	Coq2	-88.7
NONRATT017977.2	ENSRNOT00000002987	ENSRNOG00000002194	Coq2	-94
NONRATT014240.2	ENSRNOT00000002987	ENSRNOG00000002194	Coq2	-91.1
NONRATT008688.2	ENSRNOT00000002987	ENSRNOG00000002194	Coq2	-92.3
NONRATT004661.2	ENSRNOT00000002987	ENSRNOG00000002194	Coq2	-84.8
NONRATT000606.2	ENSRNOT00000002987	ENSRNOG00000002194	Coq2	-91.1
NONRATT025772.2	ENSRNOT00000026165	ENSRNOG00000019317	Cplx3	-80.9
NONRATT023910.2	ENSRNOT00000026165	ENSRNOG00000019317	Cplx3	-86.7
NONRATT023587.2	ENSRNOT00000026165	ENSRNOG00000019317	Cplx3	-92.6
NONRATT017977.2	ENSRNOT00000026165	ENSRNOG00000019317	Cplx3	-86.6
NONRATT014240.2	ENSRNOT00000026165	ENSRNOG00000019317	Cplx3	-95.8
NONRATT008688.2	ENSRNOT00000026165	ENSRNOG00000019317	Cplx3	-84.7
NONRATT004661.2	ENSRNOT00000026165	ENSRNOG00000019317	Cplx3	-87.5
NONRATT000606.2	ENSRNOT00000026165	ENSRNOG00000019317	Cplx3	-95.8
NONRATT028716.2	ENSRNOT00000044413	ENSRNOG00000034134	Cpm	-95.4
NONRATT027796.2	ENSRNOT00000044413	ENSRNOG00000034134	Cpm	-80.9
NONRATT026181.2	ENSRNOT00000044413	ENSRNOG00000034134	Cpm	-89
NONRATT021570.2	ENSRNOT00000044413	ENSRNOG00000034134	Cpm	-78.4
NONRATT021076.2	ENSRNOT00000044413	ENSRNOG00000034134	Cpm	-93.5
NONRATT018825.2	ENSRNOT00000044413	ENSRNOG00000034134	Cpm	-86.3
NONRATT017960.2	ENSRNOT00000044413	ENSRNOG00000034134	Cpm	-91.5
NONRATT014517.2	ENSRNOT00000044413	ENSRNOG00000034134	Cpm	-95.4
NONRATT012710.2	ENSRNOT00000044413	ENSRNOG00000034134	Cpm	-88.1
NONRATT011845.2	ENSRNOT00000044413	ENSRNOG00000034134	Cpm	-84.6
NONRATT010218.2	ENSRNOT00000044413	ENSRNOG00000034134	Cpm	-80.7
NONRATT007757.2	ENSRNOT00000044413	ENSRNOG00000034134	Cpm	-79.3
NONRATT006496.2	ENSRNOT00000044413	ENSRNOG00000034134	Cpm	-90.7
NONRATT005891.2	ENSRNOT00000044413	ENSRNOG00000034134	Cpm	-93.2
NONRATT001051.2	ENSRNOT00000044413	ENSRNOG00000034134	Cpm	-95.4
ENSRNOT00000089552	ENSRNOT00000044413	ENSRNOG00000034134	Cpm	-90.7
ENSRNOT00000089288	ENSRNOT00000044413	ENSRNOG00000034134	Cpm	-77.4
NONRATT027796.2	ENSRNOT00000018221	ENSRNOG00000013439	Cpn1	-81.1
NONRATT021570.2	ENSRNOT00000018221	ENSRNOG00000013439	Cpn1	-81.6
NONRATT025772.2	ENSRNOT00000085812	ENSRNOG00000009172	Cpvl	-80.9
NONRATT023910.2	ENSRNOT00000085812	ENSRNOG00000009172	Cpvl	-87.5
NONRATT023587.2	ENSRNOT00000085812	ENSRNOG00000009172	Cpvl	-92.6
NONRATT017977.2	ENSRNOT00000085812	ENSRNOG00000009172	Cpvl	-86.6
NONRATT014240.2	ENSRNOT00000085812	ENSRNOG00000009172	Cpvl	-95.8
NONRATT008688.2	ENSRNOT00000085812	ENSRNOG00000009172	Cpvl	-84.9
NONRATT004661.2	ENSRNOT00000085812	ENSRNOG00000009172	Cpvl	-87.5
NONRATT001442.2	ENSRNOT00000085812	ENSRNOG00000009172	Cpvl	-87.9
NONRATT000606.2	ENSRNOT00000085812	ENSRNOG00000009172	Cpvl	-95.8
NONRATT029310.2	ENSRNOT00000032062	ENSRNOG00000023493	Creb3l4	-76.1
NONRATT025772.2	ENSRNOT00000086719	ENSRNOG00000007115	Crebl2	-88.1
NONRATT023910.2	ENSRNOT00000086719	ENSRNOG00000007115	Crebl2	-96.2
NONRATT023587.2	ENSRNOT00000086719	ENSRNOG00000007115	Crebl2	-88.7
NONRATT017977.2	ENSRNOT00000086719	ENSRNOG00000007115	Crebl2	-94
NONRATT014240.2	ENSRNOT00000086719	ENSRNOG00000007115	Crebl2	-91.1
NONRATT008688.2	ENSRNOT00000086719	ENSRNOG00000007115	Crebl2	-92.3
NONRATT004661.2	ENSRNOT00000086719	ENSRNOG00000007115	Crebl2	-84.8
NONRATT000606.2	ENSRNOT00000086719	ENSRNOG00000007115	Crebl2	-91.1
NONRATT030282.2	ENSRNOT00000089591	ENSRNOG00000011975	Crtc3	-82.3
NONRATT028716.2	ENSRNOT00000089591	ENSRNOG00000011975	Crtc3	-89.8
NONRATT027796.2	ENSRNOT00000089591	ENSRNOG00000011975	Crtc3	-84.3
NONRATT026181.2	ENSRNOT00000089591	ENSRNOG00000011975	Crtc3	-94.5
NONRATT021570.2	ENSRNOT00000089591	ENSRNOG00000011975	Crtc3	-84.3
NONRATT021076.2	ENSRNOT00000089591	ENSRNOG00000011975	Crtc3	-86.7
NONRATT018825.2	ENSRNOT00000089591	ENSRNOG00000011975	Crtc3	-92
NONRATT017960.2	ENSRNOT00000089591	ENSRNOG00000011975	Crtc3	-88.4
NONRATT017510.2	ENSRNOT00000089591	ENSRNOG00000011975	Crtc3	-73.9
NONRATT014517.2	ENSRNOT00000089591	ENSRNOG00000011975	Crtc3	-88.4
NONRATT013372.2	ENSRNOT00000089591	ENSRNOG00000011975	Crtc3	-93.9
NONRATT012710.2	ENSRNOT00000089591	ENSRNOG00000011975	Crtc3	-93.8
NONRATT011845.2	ENSRNOT00000089591	ENSRNOG00000011975	Crtc3	-92.8
NONRATT010218.2	ENSRNOT00000089591	ENSRNOG00000011975	Crtc3	-78
NONRATT006496.2	ENSRNOT00000089591	ENSRNOG00000011975	Crtc3	-96.4
NONRATT005891.2	ENSRNOT00000089591	ENSRNOG00000011975	Crtc3	-86.4
NONRATT001051.2	ENSRNOT00000089591	ENSRNOG00000011975	Crtc3	-89.8
ENSRNOT00000089552	ENSRNOT00000089591	ENSRNOG00000011975	Crtc3	-96.4
ENSRNOT00000089288	ENSRNOT00000089591	ENSRNOG00000011975	Crtc3	-82.9
NONRATT028716.2	ENSRNOT00000016205	ENSRNOG00000011573	Csad	-96.6
NONRATT028716.2	ENSRNOT00000079678	ENSRNOG00000011573	Csad	-96.6
NONRATT026181.2	ENSRNOT00000016205	ENSRNOG00000011573	Csad	-90
NONRATT026181.2	ENSRNOT00000079678	ENSRNOG00000011573	Csad	-90
NONRATT021076.2	ENSRNOT00000079678	ENSRNOG00000011573	Csad	-90.8
NONRATT018825.2	ENSRNOT00000016205	ENSRNOG00000011573	Csad	-87.5
NONRATT018825.2	ENSRNOT00000079678	ENSRNOG00000011573	Csad	-87.5
NONRATT017960.2	ENSRNOT00000079678	ENSRNOG00000011573	Csad	-94.9
NONRATT017960.2	ENSRNOT00000016205	ENSRNOG00000011573	Csad	-94.9
NONRATT014517.2	ENSRNOT00000079678	ENSRNOG00000011573	Csad	-95.4
NONRATT014517.2	ENSRNOT00000016205	ENSRNOG00000011573	Csad	-95.4
NONRATT013372.2	ENSRNOT00000079678	ENSRNOG00000011573	Csad	-89.4
NONRATT013372.2	ENSRNOT00000016205	ENSRNOG00000011573	Csad	-89.4
NONRATT012710.2	ENSRNOT00000079678	ENSRNOG00000011573	Csad	-89.3
NONRATT012710.2	ENSRNOT00000016205	ENSRNOG00000011573	Csad	-89.3
NONRATT011845.2	ENSRNOT00000016205	ENSRNOG00000011573	Csad	-88
NONRATT011845.2	ENSRNOT00000079678	ENSRNOG00000011573	Csad	-88
NONRATT006496.2	ENSRNOT00000016205	ENSRNOG00000011573	Csad	-91.9
NONRATT006496.2	ENSRNOT00000079678	ENSRNOG00000011573	Csad	-91.9
NONRATT005891.2	ENSRNOT00000016205	ENSRNOG00000011573	Csad	-92.8
NONRATT005891.2	ENSRNOT00000079678	ENSRNOG00000011573	Csad	-92.8
NONRATT001051.2	ENSRNOT00000079678	ENSRNOG00000011573	Csad	-96.6
NONRATT001051.2	ENSRNOT00000016205	ENSRNOG00000011573	Csad	-96.6
ENSRNOT00000089552	ENSRNOT00000079678	ENSRNOG00000011573	Csad	-91.9
ENSRNOT00000089288	ENSRNOT00000079678	ENSRNOG00000011573	Csad	-78.4
NONRATT028716.2	ENSRNOT00000026613	ENSRNOG00000019653	Csrnp2	-81.3
NONRATT026181.2	ENSRNOT00000026613	ENSRNOG00000019653	Csrnp2	-85.5
NONRATT018825.2	ENSRNOT00000026613	ENSRNOG00000019653	Csrnp2	-87.2
NONRATT017960.2	ENSRNOT00000026613	ENSRNOG00000019653	Csrnp2	-82.1
NONRATT014517.2	ENSRNOT00000026613	ENSRNOG00000019653	Csrnp2	-80.1
NONRATT013372.2	ENSRNOT00000026613	ENSRNOG00000019653	Csrnp2	-85.5
NONRATT012710.2	ENSRNOT00000026613	ENSRNOG00000019653	Csrnp2	-85.3
NONRATT011845.2	ENSRNOT00000026613	ENSRNOG00000019653	Csrnp2	-85.5
NONRATT006496.2	ENSRNOT00000026613	ENSRNOG00000019653	Csrnp2	-87.9
NONRATT005891.2	ENSRNOT00000026613	ENSRNOG00000019653	Csrnp2	-79.5
NONRATT001051.2	ENSRNOT00000026613	ENSRNOG00000019653	Csrnp2	-81.3
ENSRNOT00000089552	ENSRNOT00000026613	ENSRNOG00000019653	Csrnp2	-87.9
ENSRNOT00000089288	ENSRNOT00000026613	ENSRNOG00000019653	Csrnp2	-76.9
NONRATT027796.2	ENSRNOT00000011855	ENSRNOG00000008490	Cwc15	-77.6
NONRATT021570.2	ENSRNOT00000011855	ENSRNOG00000008490	Cwc15	-74.6
NONRATT025772.2	ENSRNOT00000005426	ENSRNOG00000004091	Cwc25	-80.9
NONRATT023910.2	ENSRNOT00000005426	ENSRNOG00000004091	Cwc25	-87.5
NONRATT023587.2	ENSRNOT00000005426	ENSRNOG00000004091	Cwc25	-92.6
NONRATT017977.2	ENSRNOT00000005426	ENSRNOG00000004091	Cwc25	-86.6
NONRATT014240.2	ENSRNOT00000005426	ENSRNOG00000004091	Cwc25	-95.8
NONRATT008688.2	ENSRNOT00000005426	ENSRNOG00000004091	Cwc25	-84.9
NONRATT004661.2	ENSRNOT00000005426	ENSRNOG00000004091	Cwc25	-87.5
NONRATT001442.2	ENSRNOT00000005426	ENSRNOG00000004091	Cwc25	-87.9
NONRATT000606.2	ENSRNOT00000005426	ENSRNOG00000004091	Cwc25	-95.8
NONRATT025772.2	ENSRNOT00000017202	ENSRNOG00000012763	Cwf19l1	-80.9
NONRATT023910.2	ENSRNOT00000017202	ENSRNOG00000012763	Cwf19l1	-87.5
NONRATT023587.2	ENSRNOT00000017202	ENSRNOG00000012763	Cwf19l1	-92.2
NONRATT017977.2	ENSRNOT00000017202	ENSRNOG00000012763	Cwf19l1	-86.2
NONRATT014240.2	ENSRNOT00000017202	ENSRNOG00000012763	Cwf19l1	-95.1
NONRATT008688.2	ENSRNOT00000017202	ENSRNOG00000012763	Cwf19l1	-84.5
NONRATT004661.2	ENSRNOT00000017202	ENSRNOG00000012763	Cwf19l1	-87.5
NONRATT001442.2	ENSRNOT00000017202	ENSRNOG00000012763	Cwf19l1	-85.8
NONRATT000606.2	ENSRNOT00000017202	ENSRNOG00000012763	Cwf19l1	-95.1
NONRATT025772.2	ENSRNOT00000003823	ENSRNOG00000002843	Cxcl6	-78.5
NONRATT023910.2	ENSRNOT00000003823	ENSRNOG00000002843	Cxcl6	-86.6
NONRATT023587.2	ENSRNOT00000003823	ENSRNOG00000002843	Cxcl6	-90.5
NONRATT017977.2	ENSRNOT00000003823	ENSRNOG00000002843	Cxcl6	-84.5
NONRATT014240.2	ENSRNOT00000003823	ENSRNOG00000002843	Cxcl6	-93.4
NONRATT008688.2	ENSRNOT00000003823	ENSRNOG00000002843	Cxcl6	-82.8
NONRATT004661.2	ENSRNOT00000003823	ENSRNOG00000002843	Cxcl6	-87.5
NONRATT000606.2	ENSRNOT00000003823	ENSRNOG00000002843	Cxcl6	-93.4
NONRATT028716.2	ENSRNOT00000038994	ENSRNOG00000003622	Cybb	-95.4
NONRATT026181.2	ENSRNOT00000038994	ENSRNOG00000003622	Cybb	-89
NONRATT021076.2	ENSRNOT00000038994	ENSRNOG00000003622	Cybb	-93.5
NONRATT018825.2	ENSRNOT00000038994	ENSRNOG00000003622	Cybb	-86.3
NONRATT017960.2	ENSRNOT00000038994	ENSRNOG00000003622	Cybb	-91.5
NONRATT014517.2	ENSRNOT00000038994	ENSRNOG00000003622	Cybb	-95.4
NONRATT013372.2	ENSRNOT00000038994	ENSRNOG00000003622	Cybb	-87.7
NONRATT012710.2	ENSRNOT00000038994	ENSRNOG00000003622	Cybb	-88.1
NONRATT011845.2	ENSRNOT00000038994	ENSRNOG00000003622	Cybb	-84.6
NONRATT006496.2	ENSRNOT00000038994	ENSRNOG00000003622	Cybb	-90.7
NONRATT005891.2	ENSRNOT00000038994	ENSRNOG00000003622	Cybb	-93.2
NONRATT001051.2	ENSRNOT00000038994	ENSRNOG00000003622	Cybb	-95.4
ENSRNOT00000089552	ENSRNOT00000038994	ENSRNOG00000003622	Cybb	-90.7
ENSRNOT00000089288	ENSRNOT00000038994	ENSRNOG00000003622	Cybb	-77.4
NONRATT028716.2	ENSRNOT00000012942	ENSRNOG00000009620	Cybrd1	-86.8
NONRATT026181.2	ENSRNOT00000012942	ENSRNOG00000009620	Cybrd1	-91.5
NONRATT021076.2	ENSRNOT00000012942	ENSRNOG00000009620	Cybrd1	-81
NONRATT018825.2	ENSRNOT00000012942	ENSRNOG00000009620	Cybrd1	-89
NONRATT017960.2	ENSRNOT00000012942	ENSRNOG00000009620	Cybrd1	-85.1
NONRATT014517.2	ENSRNOT00000012942	ENSRNOG00000009620	Cybrd1	-85.6
NONRATT013372.2	ENSRNOT00000012942	ENSRNOG00000009620	Cybrd1	-90.9
NONRATT012710.2	ENSRNOT00000012942	ENSRNOG00000009620	Cybrd1	-90.8
NONRATT011845.2	ENSRNOT00000012942	ENSRNOG00000009620	Cybrd1	-89.5
NONRATT006496.2	ENSRNOT00000012942	ENSRNOG00000009620	Cybrd1	-93.4
NONRATT005891.2	ENSRNOT00000012942	ENSRNOG00000009620	Cybrd1	-83
NONRATT001051.2	ENSRNOT00000012942	ENSRNOG00000009620	Cybrd1	-86.8
ENSRNOT00000089552	ENSRNOT00000012942	ENSRNOG00000009620	Cybrd1	-93.4
ENSRNOT00000089288	ENSRNOT00000012942	ENSRNOG00000009620	Cybrd1	-79.9
NONRATT028716.2	ENSRNOT00000054742	ENSRNOG00000024016	Cyp2c6v1	-95.4
NONRATT026181.2	ENSRNOT00000054742	ENSRNOG00000024016	Cyp2c6v1	-89
NONRATT021076.2	ENSRNOT00000054742	ENSRNOG00000024016	Cyp2c6v1	-93.5
NONRATT018825.2	ENSRNOT00000054742	ENSRNOG00000024016	Cyp2c6v1	-86.3
NONRATT017960.2	ENSRNOT00000054742	ENSRNOG00000024016	Cyp2c6v1	-91.5
NONRATT014517.2	ENSRNOT00000054742	ENSRNOG00000024016	Cyp2c6v1	-95.4
NONRATT013372.2	ENSRNOT00000054742	ENSRNOG00000024016	Cyp2c6v1	-87.7
NONRATT012710.2	ENSRNOT00000054742	ENSRNOG00000024016	Cyp2c6v1	-88.1
NONRATT011845.2	ENSRNOT00000054742	ENSRNOG00000024016	Cyp2c6v1	-84.6
NONRATT006496.2	ENSRNOT00000054742	ENSRNOG00000024016	Cyp2c6v1	-90.7
NONRATT005891.2	ENSRNOT00000054742	ENSRNOG00000024016	Cyp2c6v1	-93.2
NONRATT001051.2	ENSRNOT00000054742	ENSRNOG00000024016	Cyp2c6v1	-95.4
ENSRNOT00000089552	ENSRNOT00000054742	ENSRNOG00000024016	Cyp2c6v1	-90.7
ENSRNOT00000089288	ENSRNOT00000054742	ENSRNOG00000024016	Cyp2c6v1	-77.4
NONRATT027796.2	ENSRNOT00000060284	ENSRNOG00000042496	Cyp4f17	-77.7
NONRATT021570.2	ENSRNOT00000060284	ENSRNOG00000042496	Cyp4f17	-75
NONRATT017510.2	ENSRNOT00000060284	ENSRNOG00000042496	Cyp4f17	-71
NONRATT029310.2	ENSRNOT00000068334	ENSRNOG00000012734	Dcun1d1	-82
NONRATT024782.2	ENSRNOT00000068334	ENSRNOG00000012734	Dcun1d1	-84.5
NONRATT021770.2	ENSRNOT00000068334	ENSRNOG00000012734	Dcun1d1	-71.5
ENSRNOT00000089552	ENSRNOT00000068334	ENSRNOG00000012734	Dcun1d1	-83.4
ENSRNOT00000089288	ENSRNOT00000068334	ENSRNOG00000012734	Dcun1d1	-77.9
NONRATT007757.2	ENSRNOT00000073892	ENSRNOG00000004327	Ddc	-72.4
NONRATT007757.2	ENSRNOT00000057051	ENSRNOG00000004327	Ddc	-72.4
NONRATT007757.2	ENSRNOT00000005851	ENSRNOG00000004327	Ddc	-72.4
NONRATT030282.2	ENSRNOT00000076397	ENSRNOG00000051170	Ddx17	-75.5
NONRATT027796.2	ENSRNOT00000076397	ENSRNOG00000051170	Ddx17	-84.3
NONRATT021570.2	ENSRNOT00000076397	ENSRNOG00000051170	Ddx17	-84.3
NONRATT017510.2	ENSRNOT00000076397	ENSRNOG00000051170	Ddx17	-76.1
NONRATT010218.2	ENSRNOT00000076397	ENSRNOG00000051170	Ddx17	-81.6
NONRATT027796.2	ENSRNOT00000010806	ENSRNOG00000008081	Ddx27	-80.9
NONRATT021570.2	ENSRNOT00000010806	ENSRNOG00000008081	Ddx27	-76.7
NONRATT017510.2	ENSRNOT00000010806	ENSRNOG00000008081	Ddx27	-78.5
NONRATT028716.2	ENSRNOT00000026817	ENSRNOG00000019817	Ddx28	-86.2
NONRATT026181.2	ENSRNOT00000026817	ENSRNOG00000019817	Ddx28	-87.4
NONRATT018825.2	ENSRNOT00000026817	ENSRNOG00000019817	Ddx28	-84
NONRATT017960.2	ENSRNOT00000026817	ENSRNOG00000019817	Ddx28	-86.2
NONRATT014517.2	ENSRNOT00000026817	ENSRNOG00000019817	Ddx28	-84.2
NONRATT013372.2	ENSRNOT00000026817	ENSRNOG00000019817	Ddx28	-92.7
NONRATT012710.2	ENSRNOT00000026817	ENSRNOG00000019817	Ddx28	-89.8
NONRATT011845.2	ENSRNOT00000026817	ENSRNOG00000019817	Ddx28	-91.6
NONRATT006496.2	ENSRNOT00000026817	ENSRNOG00000019817	Ddx28	-88.4
NONRATT005891.2	ENSRNOT00000026817	ENSRNOG00000019817	Ddx28	-86.3
NONRATT001051.2	ENSRNOT00000026817	ENSRNOG00000019817	Ddx28	-85.3
ENSRNOT00000089552	ENSRNOT00000026817	ENSRNOG00000019817	Ddx28	-88.4
ENSRNOT00000089288	ENSRNOT00000026817	ENSRNOG00000019817	Ddx28	-81.8
NONRATT028716.2	ENSRNOT00000082233	ENSRNOG00000000841	Ddx39b	-84.3
NONRATT026181.2	ENSRNOT00000082233	ENSRNOG00000000841	Ddx39b	-93.2
NONRATT018825.2	ENSRNOT00000082233	ENSRNOG00000000841	Ddx39b	-84.9
NONRATT017960.2	ENSRNOT00000082233	ENSRNOG00000000841	Ddx39b	-84.3
NONRATT014517.2	ENSRNOT00000082233	ENSRNOG00000000841	Ddx39b	-82.3
NONRATT013372.2	ENSRNOT00000082233	ENSRNOG00000000841	Ddx39b	-87.2
NONRATT012710.2	ENSRNOT00000082233	ENSRNOG00000000841	Ddx39b	-86.7
NONRATT011845.2	ENSRNOT00000082233	ENSRNOG00000000841	Ddx39b	-87.1
NONRATT006496.2	ENSRNOT00000082233	ENSRNOG00000000841	Ddx39b	-89.3
NONRATT005891.2	ENSRNOT00000082233	ENSRNOG00000000841	Ddx39b	-82.3
NONRATT001051.2	ENSRNOT00000082233	ENSRNOG00000000841	Ddx39b	-83.6
ENSRNOT00000089552	ENSRNOT00000082233	ENSRNOG00000000841	Ddx39b	-89.3
ENSRNOT00000089288	ENSRNOT00000082233	ENSRNOG00000000841	Ddx39b	-76.9
NONRATT007471.2	ENSRNOT00000001387	ENSRNOG00000001043	Ddx55	-94.3
NONRATT027796.2	ENSRNOT00000042146	ENSRNOG00000033147	Dear	-80.1
NONRATT021570.2	ENSRNOT00000042146	ENSRNOG00000033147	Dear	-76.8
NONRATT021570.2	ENSRNOT00000000597	ENSRNOG00000000502	Def6	-76.5
NONRATT017510.2	ENSRNOT00000000597	ENSRNOG00000000502	Def6	-72.9
NONRATT028716.2	ENSRNOT00000014541	ENSRNOG00000010794	Dennd3	-82.3
NONRATT026181.2	ENSRNOT00000014541	ENSRNOG00000010794	Dennd3	-84.4
NONRATT017960.2	ENSRNOT00000014541	ENSRNOG00000010794	Dennd3	-82.3
NONRATT014517.2	ENSRNOT00000014541	ENSRNOG00000010794	Dennd3	-80.3
NONRATT013372.2	ENSRNOT00000014541	ENSRNOG00000010794	Dennd3	-86.3
NONRATT012710.2	ENSRNOT00000014541	ENSRNOG00000010794	Dennd3	-86.3
NONRATT011845.2	ENSRNOT00000014541	ENSRNOG00000010794	Dennd3	-86.3
NONRATT006496.2	ENSRNOT00000014541	ENSRNOG00000010794	Dennd3	-84.4
NONRATT001051.2	ENSRNOT00000014541	ENSRNOG00000010794	Dennd3	-79.4
NONRATT028716.2	ENSRNOT00000067694	ENSRNOG00000018144	Depdc5	-89.8
NONRATT026181.2	ENSRNOT00000067694	ENSRNOG00000018144	Depdc5	-94.5
NONRATT021076.2	ENSRNOT00000067694	ENSRNOG00000018144	Depdc5	-84.3
NONRATT018825.2	ENSRNOT00000067694	ENSRNOG00000018144	Depdc5	-92
NONRATT017960.2	ENSRNOT00000067694	ENSRNOG00000018144	Depdc5	-88.1
NONRATT014517.2	ENSRNOT00000067694	ENSRNOG00000018144	Depdc5	-88.6
NONRATT013372.2	ENSRNOT00000067694	ENSRNOG00000018144	Depdc5	-93.9
NONRATT012710.2	ENSRNOT00000067694	ENSRNOG00000018144	Depdc5	-93.8
NONRATT011845.2	ENSRNOT00000067694	ENSRNOG00000018144	Depdc5	-92.5
NONRATT006496.2	ENSRNOT00000067694	ENSRNOG00000018144	Depdc5	-96.4
NONRATT005891.2	ENSRNOT00000067694	ENSRNOG00000018144	Depdc5	-86
NONRATT001051.2	ENSRNOT00000067694	ENSRNOG00000018144	Depdc5	-89.8
ENSRNOT00000089552	ENSRNOT00000067694	ENSRNOG00000018144	Depdc5	-96.4
ENSRNOT00000089288	ENSRNOT00000067694	ENSRNOG00000018144	Depdc5	-82.9
NONRATT007757.2	ENSRNOT00000059522	ENSRNOG00000013603	Dffa	-82.3
ENSRNOT00000088061	ENSRNOT00000059522	ENSRNOG00000013603	Dffa	-80.3
NONRATT029310.2	ENSRNOT00000018259	ENSRNOG00000013521	Dhfr	-75.6
NONRATT024782.2	ENSRNOT00000018259	ENSRNOG00000013521	Dhfr	-72.5
ENSRNOT00000089288	ENSRNOT00000018259	ENSRNOG00000013521	Dhfr	-73.9
NONRATT025772.2	ENSRNOT00000087327	ENSRNOG00000053675	Dhh	-82.2
NONRATT023910.2	ENSRNOT00000087327	ENSRNOG00000053675	Dhh	-88.6
NONRATT023587.2	ENSRNOT00000087327	ENSRNOG00000053675	Dhh	-93.4
NONRATT017977.2	ENSRNOT00000087327	ENSRNOG00000053675	Dhh	-87.4
NONRATT014240.2	ENSRNOT00000087327	ENSRNOG00000053675	Dhh	-95.1
NONRATT008688.2	ENSRNOT00000087327	ENSRNOG00000053675	Dhh	-85.7
NONRATT004661.2	ENSRNOT00000087327	ENSRNOG00000053675	Dhh	-89.5
NONRATT000606.2	ENSRNOT00000087327	ENSRNOG00000053675	Dhh	-95.1
NONRATT007757.2	ENSRNOT00000086892	ENSRNOG00000020772	Dhx8	-73.4
NONRATT025772.2	ENSRNOT00000005807	ENSRNOG00000004399	Dlx4	-82.2
NONRATT023910.2	ENSRNOT00000005807	ENSRNOG00000004399	Dlx4	-89.6
NONRATT023587.2	ENSRNOT00000005807	ENSRNOG00000004399	Dlx4	-93.8
NONRATT017977.2	ENSRNOT00000005807	ENSRNOG00000004399	Dlx4	-87.8
NONRATT014240.2	ENSRNOT00000005807	ENSRNOG00000004399	Dlx4	-96.7
NONRATT008688.2	ENSRNOT00000005807	ENSRNOG00000004399	Dlx4	-86.1
NONRATT004661.2	ENSRNOT00000005807	ENSRNOG00000004399	Dlx4	-89.5
NONRATT000606.2	ENSRNOT00000005807	ENSRNOG00000004399	Dlx4	-96.7
ENSRNOT00000078751	ENSRNOT00000005807	ENSRNOG00000004399	Dlx4	-95.1
ENSRNOT00000088061	ENSRNOT00000035545	ENSRNOG00000021312	Dnaaf5	-69.9
NONRATT028716.2	ENSRNOT00000024256	ENSRNOG00000017975	Dnajb13	-89.3
NONRATT026181.2	ENSRNOT00000024256	ENSRNOG00000017975	Dnajb13	-82.9
NONRATT021570.2	ENSRNOT00000024256	ENSRNOG00000017975	Dnajb13	-82.9
NONRATT021076.2	ENSRNOT00000024256	ENSRNOG00000017975	Dnajb13	-89.9
NONRATT018825.2	ENSRNOT00000024256	ENSRNOG00000017975	Dnajb13	-80.2
NONRATT017960.2	ENSRNOT00000024256	ENSRNOG00000017975	Dnajb13	-85.4
NONRATT014517.2	ENSRNOT00000024256	ENSRNOG00000017975	Dnajb13	-89.9
NONRATT013372.2	ENSRNOT00000024256	ENSRNOG00000017975	Dnajb13	-88.4
NONRATT012710.2	ENSRNOT00000024256	ENSRNOG00000017975	Dnajb13	-83.1
NONRATT011845.2	ENSRNOT00000024256	ENSRNOG00000017975	Dnajb13	-85.3
NONRATT006496.2	ENSRNOT00000024256	ENSRNOG00000017975	Dnajb13	-84.6
NONRATT005891.2	ENSRNOT00000024256	ENSRNOG00000017975	Dnajb13	-89.9
NONRATT001051.2	ENSRNOT00000024256	ENSRNOG00000017975	Dnajb13	-89.3
ENSRNOT00000089288	ENSRNOT00000024256	ENSRNOG00000017975	Dnajb13	-75
NONRATT028716.2	ENSRNOT00000064932	ENSRNOG00000039859	Dnmt1	-88.4
NONRATT026181.2	ENSRNOT00000064932	ENSRNOG00000039859	Dnmt1	-93.1
NONRATT018825.2	ENSRNOT00000064932	ENSRNOG00000039859	Dnmt1	-90.3
NONRATT017960.2	ENSRNOT00000064932	ENSRNOG00000039859	Dnmt1	-88.4
NONRATT014517.2	ENSRNOT00000064932	ENSRNOG00000039859	Dnmt1	-86.7
NONRATT013372.2	ENSRNOT00000064932	ENSRNOG00000039859	Dnmt1	-92.8
NONRATT012710.2	ENSRNOT00000064932	ENSRNOG00000039859	Dnmt1	-92.4
NONRATT011845.2	ENSRNOT00000064932	ENSRNOG00000039859	Dnmt1	-92.8
NONRATT006496.2	ENSRNOT00000064932	ENSRNOG00000039859	Dnmt1	-94.7
NONRATT005891.2	ENSRNOT00000064932	ENSRNOG00000039859	Dnmt1	-87.1
NONRATT001051.2	ENSRNOT00000064932	ENSRNOG00000039859	Dnmt1	-88.4
ENSRNOT00000089552	ENSRNOT00000064932	ENSRNOG00000039859	Dnmt1	-94.7
ENSRNOT00000089288	ENSRNOT00000064932	ENSRNOG00000039859	Dnmt1	-84.2
NONRATT027796.2	ENSRNOT00000018725	ENSRNOG00000013922	Dok2	-75.6
NONRATT021570.2	ENSRNOT00000018725	ENSRNOG00000013922	Dok2	-77.1
NONRATT028716.2	ENSRNOT00000026742	ENSRNOG00000019727	Dph3	-95.4
NONRATT026181.2	ENSRNOT00000026742	ENSRNOG00000019727	Dph3	-89
NONRATT021076.2	ENSRNOT00000026742	ENSRNOG00000019727	Dph3	-93.5
NONRATT018825.2	ENSRNOT00000026742	ENSRNOG00000019727	Dph3	-86.3
NONRATT017960.2	ENSRNOT00000026742	ENSRNOG00000019727	Dph3	-91.5
NONRATT014517.2	ENSRNOT00000026742	ENSRNOG00000019727	Dph3	-95.4
NONRATT013372.2	ENSRNOT00000026742	ENSRNOG00000019727	Dph3	-87.7
NONRATT012710.2	ENSRNOT00000026742	ENSRNOG00000019727	Dph3	-88.1
NONRATT011845.2	ENSRNOT00000026742	ENSRNOG00000019727	Dph3	-84.6
NONRATT006496.2	ENSRNOT00000026742	ENSRNOG00000019727	Dph3	-90.7
NONRATT005891.2	ENSRNOT00000026742	ENSRNOG00000019727	Dph3	-93.2
NONRATT001051.2	ENSRNOT00000026742	ENSRNOG00000019727	Dph3	-95.4
ENSRNOT00000089552	ENSRNOT00000026742	ENSRNOG00000019727	Dph3	-90.7
ENSRNOT00000089288	ENSRNOT00000026742	ENSRNOG00000019727	Dph3	-77.4
NONRATT030282.2	ENSRNOT00000038138	ENSRNOG00000020527	Drap1	-80.3
NONRATT027796.2	ENSRNOT00000038138	ENSRNOG00000020527	Drap1	-84.3
NONRATT021570.2	ENSRNOT00000038138	ENSRNOG00000020527	Drap1	-84.3
NONRATT017510.2	ENSRNOT00000038138	ENSRNOG00000020527	Drap1	-84.7
NONRATT025772.2	ENSRNOT00000025241	ENSRNOG00000018590	Drg1	-90.3
NONRATT023910.2	ENSRNOT00000025241	ENSRNOG00000018590	Drg1	-91.6
NONRATT023587.2	ENSRNOT00000025241	ENSRNOG00000018590	Drg1	-86.1
NONRATT017977.2	ENSRNOT00000025241	ENSRNOG00000018590	Drg1	-89.1
NONRATT014240.2	ENSRNOT00000025241	ENSRNOG00000018590	Drg1	-86.5
NONRATT008688.2	ENSRNOT00000025241	ENSRNOG00000018590	Drg1	-88.9
NONRATT004661.2	ENSRNOT00000025241	ENSRNOG00000018590	Drg1	-84.3
NONRATT000606.2	ENSRNOT00000025241	ENSRNOG00000018590	Drg1	-86.5
NONRATT028716.2	ENSRNOT00000091816	ENSRNOG00000016632	Dsg3	-96.6
NONRATT026181.2	ENSRNOT00000091816	ENSRNOG00000016632	Dsg3	-90
NONRATT021076.2	ENSRNOT00000091816	ENSRNOG00000016632	Dsg3	-93.5
NONRATT018825.2	ENSRNOT00000091816	ENSRNOG00000016632	Dsg3	-87.5
NONRATT017960.2	ENSRNOT00000091816	ENSRNOG00000016632	Dsg3	-95.2
NONRATT014517.2	ENSRNOT00000091816	ENSRNOG00000016632	Dsg3	-95.4
NONRATT013372.2	ENSRNOT00000091816	ENSRNOG00000016632	Dsg3	-89.4
NONRATT012710.2	ENSRNOT00000091816	ENSRNOG00000016632	Dsg3	-89.3
NONRATT011845.2	ENSRNOT00000091816	ENSRNOG00000016632	Dsg3	-88.3
NONRATT006496.2	ENSRNOT00000091816	ENSRNOG00000016632	Dsg3	-91.9
NONRATT005891.2	ENSRNOT00000091816	ENSRNOG00000016632	Dsg3	-93.2
NONRATT001051.2	ENSRNOT00000091816	ENSRNOG00000016632	Dsg3	-96.6
ENSRNOT00000089552	ENSRNOT00000091816	ENSRNOG00000016632	Dsg3	-91.9
ENSRNOT00000089288	ENSRNOT00000091816	ENSRNOG00000016632	Dsg3	-79.7
NONRATT012398.2	ENSRNOT00000018649	ENSRNOG00000013928	Dsp	-110.8
NONRATT025772.2	ENSRNOT00000086042	ENSRNOG00000047905	Dus1l	-88.1
NONRATT023910.2	ENSRNOT00000086042	ENSRNOG00000047905	Dus1l	-96.2
NONRATT023587.2	ENSRNOT00000086042	ENSRNOG00000047905	Dus1l	-88.7
NONRATT017977.2	ENSRNOT00000086042	ENSRNOG00000047905	Dus1l	-94
NONRATT014240.2	ENSRNOT00000086042	ENSRNOG00000047905	Dus1l	-91.1
NONRATT008688.2	ENSRNOT00000086042	ENSRNOG00000047905	Dus1l	-92.3
NONRATT004661.2	ENSRNOT00000086042	ENSRNOG00000047905	Dus1l	-84.8
NONRATT000606.2	ENSRNOT00000086042	ENSRNOG00000047905	Dus1l	-91.1
ENSRNOT00000078751	ENSRNOT00000086042	ENSRNOG00000047905	Dus1l	-83.3
NONRATT028716.2	ENSRNOT00000052224	ENSRNOG00000025408	Duxbl1	-79.7
NONRATT026181.2	ENSRNOT00000052224	ENSRNOG00000025408	Duxbl1	-83.6
NONRATT018825.2	ENSRNOT00000052224	ENSRNOG00000025408	Duxbl1	-75.1
NONRATT017960.2	ENSRNOT00000052224	ENSRNOG00000025408	Duxbl1	-80.1
NONRATT014517.2	ENSRNOT00000052224	ENSRNOG00000025408	Duxbl1	-84.7
NONRATT012710.2	ENSRNOT00000052224	ENSRNOG00000025408	Duxbl1	-79.7
NONRATT011845.2	ENSRNOT00000052224	ENSRNOG00000025408	Duxbl1	-82.7
NONRATT006496.2	ENSRNOT00000052224	ENSRNOG00000025408	Duxbl1	-78.3
NONRATT005891.2	ENSRNOT00000052224	ENSRNOG00000025408	Duxbl1	-84.7
NONRATT001051.2	ENSRNOT00000052224	ENSRNOG00000025408	Duxbl1	-77.8
NONRATT013950.2	ENSRNOT00000090299	ENSRNOG00000014746	Dzip1l	-81.1
NONRATT013950.2	ENSRNOT00000019902	ENSRNOG00000014746	Dzip1l	-81.1
NONRATT027796.2	ENSRNOT00000022022	ENSRNOG00000029549	Eci3	-81.4
NONRATT021570.2	ENSRNOT00000022022	ENSRNOG00000029549	Eci3	-79.9
NONRATT028716.2	ENSRNOT00000022726	ENSRNOG00000016448	Eef2k	-79.3
NONRATT026181.2	ENSRNOT00000022726	ENSRNOG00000016448	Eef2k	-86.2
NONRATT021076.2	ENSRNOT00000022726	ENSRNOG00000016448	Eef2k	-77.3
NONRATT018825.2	ENSRNOT00000022726	ENSRNOG00000016448	Eef2k	-78.4
NONRATT017960.2	ENSRNOT00000022726	ENSRNOG00000016448	Eef2k	-79.3
NONRATT013372.2	ENSRNOT00000022726	ENSRNOG00000016448	Eef2k	-87.7
NONRATT012710.2	ENSRNOT00000022726	ENSRNOG00000016448	Eef2k	-85.9
NONRATT011845.2	ENSRNOT00000022726	ENSRNOG00000016448	Eef2k	-87.7
NONRATT006496.2	ENSRNOT00000022726	ENSRNOG00000016448	Eef2k	-82.8
NONRATT005891.2	ENSRNOT00000022726	ENSRNOG00000016448	Eef2k	-77.8
NONRATT001051.2	ENSRNOT00000022726	ENSRNOG00000016448	Eef2k	-78.9
ENSRNOT00000089552	ENSRNOT00000022726	ENSRNOG00000016448	Eef2k	-82.8
ENSRNOT00000089288	ENSRNOT00000022726	ENSRNOG00000016448	Eef2k	-78.5
NONRATT028716.2	ENSRNOT00000029723	ENSRNOG00000042201	Efcab2	-95.4
NONRATT026181.2	ENSRNOT00000029723	ENSRNOG00000042201	Efcab2	-89
NONRATT021076.2	ENSRNOT00000029723	ENSRNOG00000042201	Efcab2	-93.5
NONRATT018825.2	ENSRNOT00000029723	ENSRNOG00000042201	Efcab2	-86.3
NONRATT017960.2	ENSRNOT00000029723	ENSRNOG00000042201	Efcab2	-91.5
NONRATT014517.2	ENSRNOT00000029723	ENSRNOG00000042201	Efcab2	-95.4
NONRATT013372.2	ENSRNOT00000029723	ENSRNOG00000042201	Efcab2	-87.7
NONRATT012710.2	ENSRNOT00000029723	ENSRNOG00000042201	Efcab2	-88.1
NONRATT011845.2	ENSRNOT00000029723	ENSRNOG00000042201	Efcab2	-84.6
NONRATT006496.2	ENSRNOT00000029723	ENSRNOG00000042201	Efcab2	-90.7
NONRATT005891.2	ENSRNOT00000029723	ENSRNOG00000042201	Efcab2	-93.2
NONRATT001051.2	ENSRNOT00000029723	ENSRNOG00000042201	Efcab2	-95.4
ENSRNOT00000089552	ENSRNOT00000029723	ENSRNOG00000042201	Efcab2	-90.7
ENSRNOT00000089288	ENSRNOT00000029723	ENSRNOG00000042201	Efcab2	-77.4
NONRATT028716.2	ENSRNOT00000022514	ENSRNOG00000042029	Efs	-87.4
NONRATT026181.2	ENSRNOT00000022514	ENSRNOG00000042029	Efs	-87
NONRATT021076.2	ENSRNOT00000022514	ENSRNOG00000042029	Efs	-78.5
NONRATT018825.2	ENSRNOT00000022514	ENSRNOG00000042029	Efs	-83.8
NONRATT017960.2	ENSRNOT00000022514	ENSRNOG00000042029	Efs	-87.4
NONRATT014517.2	ENSRNOT00000022514	ENSRNOG00000042029	Efs	-85.4
NONRATT013372.2	ENSRNOT00000022514	ENSRNOG00000042029	Efs	-87.9
NONRATT012710.2	ENSRNOT00000022514	ENSRNOG00000042029	Efs	-85.6
NONRATT011845.2	ENSRNOT00000022514	ENSRNOG00000042029	Efs	-86
NONRATT006496.2	ENSRNOT00000022514	ENSRNOG00000042029	Efs	-88.2
NONRATT005891.2	ENSRNOT00000022514	ENSRNOG00000042029	Efs	-85
NONRATT001051.2	ENSRNOT00000022514	ENSRNOG00000042029	Efs	-83.9
ENSRNOT00000089552	ENSRNOT00000022514	ENSRNOG00000042029	Efs	-88.2
ENSRNOT00000089288	ENSRNOT00000022514	ENSRNOG00000042029	Efs	-76
NONRATT025772.2	ENSRNOT00000002410	ENSRNOG00000001770	Ehhadh	-80.9
NONRATT023910.2	ENSRNOT00000002410	ENSRNOG00000001770	Ehhadh	-87.5
NONRATT023587.2	ENSRNOT00000002410	ENSRNOG00000001770	Ehhadh	-92.6
NONRATT017977.2	ENSRNOT00000002410	ENSRNOG00000001770	Ehhadh	-86.6
NONRATT014240.2	ENSRNOT00000002410	ENSRNOG00000001770	Ehhadh	-95.8
NONRATT008688.2	ENSRNOT00000002410	ENSRNOG00000001770	Ehhadh	-84.9
NONRATT004661.2	ENSRNOT00000002410	ENSRNOG00000001770	Ehhadh	-87.2
NONRATT000606.2	ENSRNOT00000002410	ENSRNOG00000001770	Ehhadh	-95.8
NONRATT025772.2	ENSRNOT00000027753	ENSRNOG00000020463	Eif1ad	-81.1
NONRATT023910.2	ENSRNOT00000027753	ENSRNOG00000020463	Eif1ad	-88.8
NONRATT023587.2	ENSRNOT00000027753	ENSRNOG00000020463	Eif1ad	-84.9
NONRATT017977.2	ENSRNOT00000027753	ENSRNOG00000020463	Eif1ad	-86.7
NONRATT014240.2	ENSRNOT00000027753	ENSRNOG00000020463	Eif1ad	-76.7
NONRATT008688.2	ENSRNOT00000027753	ENSRNOG00000020463	Eif1ad	-85
NONRATT004661.2	ENSRNOT00000027753	ENSRNOG00000020463	Eif1ad	-80.7
NONRATT000606.2	ENSRNOT00000027753	ENSRNOG00000020463	Eif1ad	-77.7
NONRATT028716.2	ENSRNOT00000001392	ENSRNOG00000001050	Eif2ak1	-95.4
NONRATT026181.2	ENSRNOT00000001392	ENSRNOG00000001050	Eif2ak1	-89
NONRATT017960.2	ENSRNOT00000001392	ENSRNOG00000001050	Eif2ak1	-91.5
NONRATT014517.2	ENSRNOT00000001392	ENSRNOG00000001050	Eif2ak1	-95.4
NONRATT013372.2	ENSRNOT00000001392	ENSRNOG00000001050	Eif2ak1	-87.7
NONRATT012710.2	ENSRNOT00000001392	ENSRNOG00000001050	Eif2ak1	-88.1
NONRATT011845.2	ENSRNOT00000001392	ENSRNOG00000001050	Eif2ak1	-84.6
NONRATT006496.2	ENSRNOT00000001392	ENSRNOG00000001050	Eif2ak1	-90.7
NONRATT005891.2	ENSRNOT00000001392	ENSRNOG00000001050	Eif2ak1	-93.2
NONRATT001051.2	ENSRNOT00000001392	ENSRNOG00000001050	Eif2ak1	-95.4
NONRATT029310.2	ENSRNOT00000008730	ENSRNOG00000006467	Eif2b2	-80
NONRATT025222.2	ENSRNOT00000008730	ENSRNOG00000006467	Eif2b2	-82.5
NONRATT024782.2	ENSRNOT00000008730	ENSRNOG00000006467	Eif2b2	-81.3
NONRATT022043.2	ENSRNOT00000008730	ENSRNOG00000006467	Eif2b2	-77.6
NONRATT021770.2	ENSRNOT00000008730	ENSRNOG00000006467	Eif2b2	-69.5
NONRATT021035.2	ENSRNOT00000008730	ENSRNOG00000006467	Eif2b2	-75.8
NONRATT010578.2	ENSRNOT00000008730	ENSRNOG00000006467	Eif2b2	-77.6
ENSRNOT00000089552	ENSRNOT00000008730	ENSRNOG00000006467	Eif2b2	-83.4
ENSRNOT00000089288	ENSRNOT00000008730	ENSRNOG00000006467	Eif2b2	-79.6
NONRATT027796.2	ENSRNOT00000024841	ENSRNOG00000018375	Eif2b3	-84.3
NONRATT021570.2	ENSRNOT00000024841	ENSRNOG00000018375	Eif2b3	-84.3
NONRATT025772.2	ENSRNOT00000000125	ENSRNOG00000000113	Elac1	-88.1
NONRATT023910.2	ENSRNOT00000000125	ENSRNOG00000000113	Elac1	-96.2
NONRATT023587.2	ENSRNOT00000000125	ENSRNOG00000000113	Elac1	-88.7
NONRATT017977.2	ENSRNOT00000000125	ENSRNOG00000000113	Elac1	-94
NONRATT014240.2	ENSRNOT00000000125	ENSRNOG00000000113	Elac1	-90.4
NONRATT008688.2	ENSRNOT00000000125	ENSRNOG00000000113	Elac1	-92.3
NONRATT004661.2	ENSRNOT00000000125	ENSRNOG00000000113	Elac1	-84.8
NONRATT001442.2	ENSRNOT00000000125	ENSRNOG00000000113	Elac1	-85.4
NONRATT000606.2	ENSRNOT00000000125	ENSRNOG00000000113	Elac1	-90.4
ENSRNOT00000078751	ENSRNOT00000000125	ENSRNOG00000000113	Elac1	-83.3
NONRATT028716.2	ENSRNOT00000065094	ENSRNOG00000007887	Elk4	-86.2
NONRATT026181.2	ENSRNOT00000065094	ENSRNOG00000007887	Elk4	-90
NONRATT018825.2	ENSRNOT00000065094	ENSRNOG00000007887	Elk4	-88
NONRATT017960.2	ENSRNOT00000065094	ENSRNOG00000007887	Elk4	-87.5
NONRATT014517.2	ENSRNOT00000065094	ENSRNOG00000007887	Elk4	-84.6
NONRATT013372.2	ENSRNOT00000065094	ENSRNOG00000007887	Elk4	-89.8
NONRATT012710.2	ENSRNOT00000065094	ENSRNOG00000007887	Elk4	-89.8
NONRATT011845.2	ENSRNOT00000065094	ENSRNOG00000007887	Elk4	-89.8
NONRATT006496.2	ENSRNOT00000065094	ENSRNOG00000007887	Elk4	-92.4
NONRATT001051.2	ENSRNOT00000065094	ENSRNOG00000007887	Elk4	-85.8
ENSRNOT00000089552	ENSRNOT00000065094	ENSRNOG00000007887	Elk4	-92.4
ENSRNOT00000089288	ENSRNOT00000065094	ENSRNOG00000007887	Elk4	-81.8
NONRATT029310.2	ENSRNOT00000031614	ENSRNOG00000028176	Elmod2	-78.1
NONRATT025222.2	ENSRNOT00000031614	ENSRNOG00000028176	Elmod2	-75.5
NONRATT022043.2	ENSRNOT00000031614	ENSRNOG00000028176	Elmod2	-77.6
NONRATT021035.2	ENSRNOT00000031614	ENSRNOG00000028176	Elmod2	-68.9
NONRATT017283.2	ENSRNOT00000031614	ENSRNOG00000028176	Elmod2	-76.8
NONRATT010578.2	ENSRNOT00000031614	ENSRNOG00000028176	Elmod2	-76.3
ENSRNOT00000089552	ENSRNOT00000031614	ENSRNOG00000028176	Elmod2	-71
ENSRNOT00000089288	ENSRNOT00000031614	ENSRNOG00000028176	Elmod2	-76.5
NONRATT025772.2	ENSRNOT00000057989	ENSRNOG00000038102	Elmod3	-83
NONRATT023587.2	ENSRNOT00000057989	ENSRNOG00000038102	Elmod3	-82.4
NONRATT017977.2	ENSRNOT00000057989	ENSRNOG00000038102	Elmod3	-80.1
NONRATT008688.2	ENSRNOT00000057989	ENSRNOG00000038102	Elmod3	-82.6
NONRATT027796.2	ENSRNOT00000068168	ENSRNOG00000018097	Emc1	-81.1
NONRATT021570.2	ENSRNOT00000068168	ENSRNOG00000018097	Emc1	-81.1
NONRATT017510.2	ENSRNOT00000068168	ENSRNOG00000018097	Emc1	-78.5
NONRATT013950.2	ENSRNOT00000068168	ENSRNOG00000018097	Emc1	-87.3
NONRATT025772.2	ENSRNOT00000026168	ENSRNOG00000019352	Emc6	-83.6
NONRATT023910.2	ENSRNOT00000026168	ENSRNOG00000019352	Emc6	-91.7
NONRATT023587.2	ENSRNOT00000026168	ENSRNOG00000019352	Emc6	-84.6
NONRATT017977.2	ENSRNOT00000026168	ENSRNOG00000019352	Emc6	-89.5
NONRATT014240.2	ENSRNOT00000026168	ENSRNOG00000019352	Emc6	-87.5
NONRATT008688.2	ENSRNOT00000026168	ENSRNOG00000019352	Emc6	-87.8
NONRATT004661.2	ENSRNOT00000026168	ENSRNOG00000019352	Emc6	-84.5
NONRATT000606.2	ENSRNOT00000026168	ENSRNOG00000019352	Emc6	-87.5
ENSRNOT00000078751	ENSRNOT00000026168	ENSRNOG00000019352	Emc6	-79.5
NONRATT027796.2	ENSRNOT00000017334	ENSRNOG00000012828	Emg1	-79.8
NONRATT021570.2	ENSRNOT00000017334	ENSRNOG00000012828	Emg1	-73.6
NONRATT020890.2	ENSRNOT00000017334	ENSRNOG00000012828	Emg1	-90.1
NONRATT025772.2	ENSRNOT00000015556	ENSRNOG00000011649	Epb42	-86.2
NONRATT023910.2	ENSRNOT00000015556	ENSRNOG00000011649	Epb42	-94.3
NONRATT023587.2	ENSRNOT00000015556	ENSRNOG00000011649	Epb42	-86.8
NONRATT017977.2	ENSRNOT00000015556	ENSRNOG00000011649	Epb42	-92.1
NONRATT014240.2	ENSRNOT00000015556	ENSRNOG00000011649	Epb42	-89.2
NONRATT008688.2	ENSRNOT00000015556	ENSRNOG00000011649	Epb42	-90.4
NONRATT004661.2	ENSRNOT00000015556	ENSRNOG00000011649	Epb42	-80
NONRATT000606.2	ENSRNOT00000015556	ENSRNOG00000011649	Epb42	-89.2
NONRATT018874.2	ENSRNOT00000019829	ENSRNOG00000028908	Eppin	-85.7
NONRATT028716.2	ENSRNOT00000009404	ENSRNOG00000006462	Ero1l	-96.6
NONRATT026181.2	ENSRNOT00000009404	ENSRNOG00000006462	Ero1l	-90
NONRATT018825.2	ENSRNOT00000009404	ENSRNOG00000006462	Ero1l	-87.5
NONRATT017960.2	ENSRNOT00000009404	ENSRNOG00000006462	Ero1l	-94.9
NONRATT014517.2	ENSRNOT00000009404	ENSRNOG00000006462	Ero1l	-95.4
NONRATT013372.2	ENSRNOT00000009404	ENSRNOG00000006462	Ero1l	-89.4
NONRATT012710.2	ENSRNOT00000009404	ENSRNOG00000006462	Ero1l	-89.3
NONRATT011845.2	ENSRNOT00000009404	ENSRNOG00000006462	Ero1l	-88
NONRATT006496.2	ENSRNOT00000009404	ENSRNOG00000006462	Ero1l	-91.9
NONRATT005891.2	ENSRNOT00000009404	ENSRNOG00000006462	Ero1l	-92.8
NONRATT001051.2	ENSRNOT00000009404	ENSRNOG00000006462	Ero1l	-96.6
ENSRNOT00000089552	ENSRNOT00000009404	ENSRNOG00000006462	Ero1l	-91.9
ENSRNOT00000089288	ENSRNOT00000009404	ENSRNOG00000006462	Ero1l	-78.4
NONRATT029060.2	ENSRNOT00000074209	ENSRNOG00000045743	Etnppl	-83
NONRATT028716.2	ENSRNOT00000038365	ENSRNOG00000025360	Exd1	-80.2
NONRATT027796.2	ENSRNOT00000038365	ENSRNOG00000025360	Exd1	-81.8
NONRATT026181.2	ENSRNOT00000038365	ENSRNOG00000025360	Exd1	-87.1
NONRATT021570.2	ENSRNOT00000038365	ENSRNOG00000025360	Exd1	-79.7
NONRATT018825.2	ENSRNOT00000038365	ENSRNOG00000025360	Exd1	-82.4
NONRATT017960.2	ENSRNOT00000038365	ENSRNOG00000025360	Exd1	-80.2
NONRATT013372.2	ENSRNOT00000038365	ENSRNOG00000025360	Exd1	-84.4
NONRATT012710.2	ENSRNOT00000038365	ENSRNOG00000025360	Exd1	-84.2
NONRATT011845.2	ENSRNOT00000038365	ENSRNOG00000025360	Exd1	-84.3
NONRATT006496.2	ENSRNOT00000038365	ENSRNOG00000025360	Exd1	-86.8
NONRATT005891.2	ENSRNOT00000038365	ENSRNOG00000025360	Exd1	-79.2
NONRATT001051.2	ENSRNOT00000038365	ENSRNOG00000025360	Exd1	-80.2
ENSRNOT00000089552	ENSRNOT00000038365	ENSRNOG00000025360	Exd1	-86.8
ENSRNOT00000089288	ENSRNOT00000038365	ENSRNOG00000025360	Exd1	-73.3
NONRATT029310.2	ENSRNOT00000020174	ENSRNOG00000014801	Exog	-81.4
NONRATT024782.2	ENSRNOT00000020174	ENSRNOG00000014801	Exog	-84.5
NONRATT021035.2	ENSRNOT00000020174	ENSRNOG00000014801	Exog	-75.8
ENSRNOT00000089552	ENSRNOT00000020174	ENSRNOG00000014801	Exog	-83.4
ENSRNOT00000089288	ENSRNOT00000020174	ENSRNOG00000014801	Exog	-81.1
NONRATT025772.2	ENSRNOT00000074626	ENSRNOG00000048043	F2r	-75
NONRATT023910.2	ENSRNOT00000074626	ENSRNOG00000048043	F2r	-82.9
NONRATT023587.2	ENSRNOT00000074626	ENSRNOG00000048043	F2r	-81.9
NONRATT017977.2	ENSRNOT00000074626	ENSRNOG00000048043	F2r	-78.9
NONRATT014240.2	ENSRNOT00000074626	ENSRNOG00000048043	F2r	-73.3
NONRATT008688.2	ENSRNOT00000074626	ENSRNOG00000048043	F2r	-79.8
NONRATT004661.2	ENSRNOT00000074626	ENSRNOG00000048043	F2r	-77.7
NONRATT000606.2	ENSRNOT00000074626	ENSRNOG00000048043	F2r	-73.3
NONRATT025772.2	ENSRNOT00000084017	ENSRNOG00000058790	Fam120b	-78.1
NONRATT023910.2	ENSRNOT00000084017	ENSRNOG00000058790	Fam120b	-85.5
NONRATT023587.2	ENSRNOT00000084017	ENSRNOG00000058790	Fam120b	-89.3
NONRATT017977.2	ENSRNOT00000084017	ENSRNOG00000058790	Fam120b	-84.1
NONRATT014240.2	ENSRNOT00000084017	ENSRNOG00000058790	Fam120b	-91.7
NONRATT008688.2	ENSRNOT00000084017	ENSRNOG00000058790	Fam120b	-81.6
NONRATT004661.2	ENSRNOT00000084017	ENSRNOG00000058790	Fam120b	-84.3
NONRATT000606.2	ENSRNOT00000084017	ENSRNOG00000058790	Fam120b	-91.7
ENSRNOT00000078751	ENSRNOT00000084017	ENSRNOG00000058790	Fam120b	-83.8
NONRATT028716.2	ENSRNOT00000043230	ENSRNOG00000002255	Fam162a	-95.4
NONRATT026181.2	ENSRNOT00000043230	ENSRNOG00000002255	Fam162a	-89
NONRATT017960.2	ENSRNOT00000043230	ENSRNOG00000002255	Fam162a	-91.5
NONRATT014517.2	ENSRNOT00000043230	ENSRNOG00000002255	Fam162a	-95.4
NONRATT013372.2	ENSRNOT00000043230	ENSRNOG00000002255	Fam162a	-87.7
NONRATT012710.2	ENSRNOT00000043230	ENSRNOG00000002255	Fam162a	-88.1
NONRATT011845.2	ENSRNOT00000043230	ENSRNOG00000002255	Fam162a	-84.6
NONRATT006496.2	ENSRNOT00000043230	ENSRNOG00000002255	Fam162a	-90.7
NONRATT005891.2	ENSRNOT00000043230	ENSRNOG00000002255	Fam162a	-93.2
NONRATT001051.2	ENSRNOT00000043230	ENSRNOG00000002255	Fam162a	-95.4
NONRATT021570.2	ENSRNOT00000013031	ENSRNOG00000009830	Fam204a	-70
NONRATT017510.2	ENSRNOT00000001640	ENSRNOG00000001225	Fam207a	-70.5
NONRATT007757.2	ENSRNOT00000001640	ENSRNOG00000001225	Fam207a	-85.8
NONRATT001442.2	ENSRNOT00000001640	ENSRNOG00000001225	Fam207a	-83.1
NONRATT025772.2	ENSRNOT00000006018	ENSRNOG00000004337	Fam20b	-86.2
NONRATT023910.2	ENSRNOT00000006018	ENSRNOG00000004337	Fam20b	-94.5
NONRATT023587.2	ENSRNOT00000006018	ENSRNOG00000004337	Fam20b	-85.2
NONRATT014240.2	ENSRNOT00000006018	ENSRNOG00000004337	Fam20b	-84.9
NONRATT008688.2	ENSRNOT00000006018	ENSRNOG00000004337	Fam20b	-88.8
NONRATT004661.2	ENSRNOT00000006018	ENSRNOG00000004337	Fam20b	-77.1
NONRATT000606.2	ENSRNOT00000006018	ENSRNOG00000004337	Fam20b	-84.9
NONRATT023910.2	ENSRNOT00000019556	ENSRNOG00000039528	Fam32a	-88.6
NONRATT023587.2	ENSRNOT00000019556	ENSRNOG00000039528	Fam32a	-92.5
NONRATT017977.2	ENSRNOT00000019556	ENSRNOG00000039528	Fam32a	-86.5
NONRATT014240.2	ENSRNOT00000019556	ENSRNOG00000039528	Fam32a	-87.6
NONRATT008688.2	ENSRNOT00000019556	ENSRNOG00000039528	Fam32a	-84.8
NONRATT004661.2	ENSRNOT00000019556	ENSRNOG00000039528	Fam32a	-89.5
NONRATT000606.2	ENSRNOT00000019556	ENSRNOG00000039528	Fam32a	-88.8
ENSRNOT00000078751	ENSRNOT00000019556	ENSRNOG00000039528	Fam32a	-81.5
NONRATT023587.2	ENSRNOT00000006186	ENSRNOG00000004532	Fam69b	-78.8
NONRATT017977.2	ENSRNOT00000006186	ENSRNOG00000004532	Fam69b	-76.8
NONRATT008688.2	ENSRNOT00000006186	ENSRNOG00000004532	Fam69b	-79.9
NONRATT007757.2	ENSRNOT00000008330	ENSRNOG00000006251	Fam83a	-75.2
NONRATT028716.2	ENSRNOT00000024835	ENSRNOG00000018330	Fam83f	-89.2
NONRATT026181.2	ENSRNOT00000024835	ENSRNOG00000018330	Fam83f	-86.7
NONRATT017960.2	ENSRNOT00000024835	ENSRNOG00000018330	Fam83f	-89.2
NONRATT014517.2	ENSRNOT00000024835	ENSRNOG00000018330	Fam83f	-87.2
NONRATT013372.2	ENSRNOT00000024835	ENSRNOG00000018330	Fam83f	-87.6
NONRATT012710.2	ENSRNOT00000024835	ENSRNOG00000018330	Fam83f	-90
NONRATT011845.2	ENSRNOT00000024835	ENSRNOG00000018330	Fam83f	-84.5
NONRATT006496.2	ENSRNOT00000024835	ENSRNOG00000018330	Fam83f	-79.1
NONRATT005891.2	ENSRNOT00000024835	ENSRNOG00000018330	Fam83f	-87.2
NONRATT001051.2	ENSRNOT00000024835	ENSRNOG00000018330	Fam83f	-87.7
NONRATT021106.2	ENSRNOT00000064893	ENSRNOG00000011667	Fastk	-98.8
NONRATT025772.2	ENSRNOT00000014478	ENSRNOG00000009549	Fbxo3	-83.1
NONRATT023910.2	ENSRNOT00000014478	ENSRNOG00000009549	Fbxo3	-84.4
NONRATT023587.2	ENSRNOT00000014478	ENSRNOG00000009549	Fbxo3	-79.8
NONRATT017977.2	ENSRNOT00000014478	ENSRNOG00000009549	Fbxo3	-81.9
NONRATT014240.2	ENSRNOT00000014478	ENSRNOG00000009549	Fbxo3	-79.3
NONRATT008688.2	ENSRNOT00000014478	ENSRNOG00000009549	Fbxo3	-80.9
NONRATT004661.2	ENSRNOT00000014478	ENSRNOG00000009549	Fbxo3	-78
NONRATT000606.2	ENSRNOT00000014478	ENSRNOG00000009549	Fbxo3	-79.3
NONRATT027796.2	ENSRNOT00000091541	ENSRNOG00000046452	Fcgr2b	-77.8
NONRATT021570.2	ENSRNOT00000091541	ENSRNOG00000046452	Fcgr2b	-76.9
NONRATT023910.2	ENSRNOT00000004183	ENSRNOG00000003136	Fcrla	-91.2
NONRATT023587.2	ENSRNOT00000004183	ENSRNOG00000003136	Fcrla	-84.9
NONRATT017977.2	ENSRNOT00000004183	ENSRNOG00000003136	Fcrla	-89.1
NONRATT008688.2	ENSRNOT00000004183	ENSRNOG00000003136	Fcrla	-89.4
NONRATT000606.2	ENSRNOT00000004183	ENSRNOG00000003136	Fcrla	-80.1
NONRATT028716.2	ENSRNOT00000002476	ENSRNOG00000001811	Fgfr1op2	-86.2
NONRATT028716.2	ENSRNOT00000042270	ENSRNOG00000001811	Fgfr1op2	-86.2
NONRATT026181.2	ENSRNOT00000002476	ENSRNOG00000001811	Fgfr1op2	-87.9
NONRATT026181.2	ENSRNOT00000042270	ENSRNOG00000001811	Fgfr1op2	-87.9
NONRATT018825.2	ENSRNOT00000002476	ENSRNOG00000001811	Fgfr1op2	-85.4
NONRATT018825.2	ENSRNOT00000042270	ENSRNOG00000001811	Fgfr1op2	-85.4
NONRATT017960.2	ENSRNOT00000002476	ENSRNOG00000001811	Fgfr1op2	-86.2
NONRATT017960.2	ENSRNOT00000042270	ENSRNOG00000001811	Fgfr1op2	-86.2
NONRATT014517.2	ENSRNOT00000042270	ENSRNOG00000001811	Fgfr1op2	-84.2
NONRATT014517.2	ENSRNOT00000002476	ENSRNOG00000001811	Fgfr1op2	-84.2
NONRATT013372.2	ENSRNOT00000042270	ENSRNOG00000001811	Fgfr1op2	-87.8
NONRATT013372.2	ENSRNOT00000002476	ENSRNOG00000001811	Fgfr1op2	-87.8
NONRATT012710.2	ENSRNOT00000042270	ENSRNOG00000001811	Fgfr1op2	-87.2
NONRATT012710.2	ENSRNOT00000002476	ENSRNOG00000001811	Fgfr1op2	-87.2
NONRATT011845.2	ENSRNOT00000002476	ENSRNOG00000001811	Fgfr1op2	-86.2
NONRATT011845.2	ENSRNOT00000042270	ENSRNOG00000001811	Fgfr1op2	-86.2
NONRATT006496.2	ENSRNOT00000002476	ENSRNOG00000001811	Fgfr1op2	-89.8
NONRATT006496.2	ENSRNOT00000042270	ENSRNOG00000001811	Fgfr1op2	-89.8
NONRATT005891.2	ENSRNOT00000042270	ENSRNOG00000001811	Fgfr1op2	-84.9
NONRATT005891.2	ENSRNOT00000002476	ENSRNOG00000001811	Fgfr1op2	-84.9
NONRATT001051.2	ENSRNOT00000002476	ENSRNOG00000001811	Fgfr1op2	-85.5
NONRATT001051.2	ENSRNOT00000042270	ENSRNOG00000001811	Fgfr1op2	-85.5
ENSRNOT00000089552	ENSRNOT00000042270	ENSRNOG00000001811	Fgfr1op2	-89.8
ENSRNOT00000089552	ENSRNOT00000002476	ENSRNOG00000001811	Fgfr1op2	-89.8
ENSRNOT00000089288	ENSRNOT00000042270	ENSRNOG00000001811	Fgfr1op2	-77.6
ENSRNOT00000089288	ENSRNOT00000002476	ENSRNOG00000001811	Fgfr1op2	-77.6
NONRATT028716.2	ENSRNOT00000031904	ENSRNOG00000027434	Fitm2	-84.5
NONRATT026181.2	ENSRNOT00000031904	ENSRNOG00000027434	Fitm2	-87.9
NONRATT025772.2	ENSRNOT00000031904	ENSRNOG00000027434	Fitm2	-80.3
NONRATT023910.2	ENSRNOT00000031904	ENSRNOG00000027434	Fitm2	-87.7
NONRATT023587.2	ENSRNOT00000031904	ENSRNOG00000027434	Fitm2	-91.5
NONRATT021076.2	ENSRNOT00000031904	ENSRNOG00000027434	Fitm2	-78.9
NONRATT018825.2	ENSRNOT00000031904	ENSRNOG00000027434	Fitm2	-85.4
NONRATT017977.2	ENSRNOT00000031904	ENSRNOG00000027434	Fitm2	-85.5
NONRATT017960.2	ENSRNOT00000031904	ENSRNOG00000027434	Fitm2	-83.8
NONRATT014517.2	ENSRNOT00000031904	ENSRNOG00000027434	Fitm2	-83.6
NONRATT014240.2	ENSRNOT00000031904	ENSRNOG00000027434	Fitm2	-93.9
NONRATT013372.2	ENSRNOT00000031904	ENSRNOG00000027434	Fitm2	-87.3
NONRATT012710.2	ENSRNOT00000031904	ENSRNOG00000027434	Fitm2	-87.2
NONRATT011845.2	ENSRNOT00000031904	ENSRNOG00000027434	Fitm2	-85.9
NONRATT008688.2	ENSRNOT00000031904	ENSRNOG00000027434	Fitm2	-83.8
NONRATT006496.2	ENSRNOT00000031904	ENSRNOG00000027434	Fitm2	-89.8
NONRATT005891.2	ENSRNOT00000031904	ENSRNOG00000027434	Fitm2	-82.5
NONRATT004661.2	ENSRNOT00000031904	ENSRNOG00000027434	Fitm2	-86.1
NONRATT001442.2	ENSRNOT00000031904	ENSRNOG00000027434	Fitm2	-86
NONRATT001051.2	ENSRNOT00000031904	ENSRNOG00000027434	Fitm2	-83.6
NONRATT000606.2	ENSRNOT00000031904	ENSRNOG00000027434	Fitm2	-93.9
ENSRNOT00000089552	ENSRNOT00000031904	ENSRNOG00000027434	Fitm2	-89.8
ENSRNOT00000089288	ENSRNOT00000031904	ENSRNOG00000027434	Fitm2	-76.3
NONRATT029310.2	ENSRNOT00000007544	ENSRNOG00000005618	Fmc1	-79.8
NONRATT024782.2	ENSRNOT00000007544	ENSRNOG00000005618	Fmc1	-81.3
NONRATT021035.2	ENSRNOT00000007544	ENSRNOG00000005618	Fmc1	-68.3
NONRATT010578.2	ENSRNOT00000007544	ENSRNOG00000005618	Fmc1	-75.8
ENSRNOT00000089552	ENSRNOT00000007544	ENSRNOG00000005618	Fmc1	-73.8
ENSRNOT00000089288	ENSRNOT00000007544	ENSRNOG00000005618	Fmc1	-76.5
NONRATT028716.2	ENSRNOT00000007598	ENSRNOG00000005749	Foxred2	-87.1
NONRATT026181.2	ENSRNOT00000007598	ENSRNOG00000005749	Foxred2	-86.5
NONRATT025772.2	ENSRNOT00000007598	ENSRNOG00000005749	Foxred2	-86.4
NONRATT023910.2	ENSRNOT00000007598	ENSRNOG00000005749	Foxred2	-90.3
NONRATT023587.2	ENSRNOT00000007598	ENSRNOG00000005749	Foxred2	-84.5
NONRATT018825.2	ENSRNOT00000007598	ENSRNOG00000005749	Foxred2	-83.7
NONRATT017977.2	ENSRNOT00000007598	ENSRNOG00000005749	Foxred2	-94.3
NONRATT017960.2	ENSRNOT00000007598	ENSRNOG00000005749	Foxred2	-87.1
NONRATT014517.2	ENSRNOT00000007598	ENSRNOG00000005749	Foxred2	-85.1
NONRATT014240.2	ENSRNOT00000007598	ENSRNOG00000005749	Foxred2	-86.1
NONRATT013372.2	ENSRNOT00000007598	ENSRNOG00000005749	Foxred2	-86.2
NONRATT012710.2	ENSRNOT00000007598	ENSRNOG00000005749	Foxred2	-85.8
NONRATT011845.2	ENSRNOT00000007598	ENSRNOG00000005749	Foxred2	-86.2
NONRATT008688.2	ENSRNOT00000007598	ENSRNOG00000005749	Foxred2	-90.2
NONRATT006496.2	ENSRNOT00000007598	ENSRNOG00000005749	Foxred2	-88.1
NONRATT005891.2	ENSRNOT00000007598	ENSRNOG00000005749	Foxred2	-84.2
NONRATT004661.2	ENSRNOT00000007598	ENSRNOG00000005749	Foxred2	-82.5
NONRATT001051.2	ENSRNOT00000007598	ENSRNOG00000005749	Foxred2	-85.3
NONRATT000606.2	ENSRNOT00000007598	ENSRNOG00000005749	Foxred2	-86.1
ENSRNOT00000089552	ENSRNOT00000007598	ENSRNOG00000005749	Foxred2	-88.1
ENSRNOT00000089288	ENSRNOT00000007598	ENSRNOG00000005749	Foxred2	-77.6
NONRATT007757.2	ENSRNOT00000072830	ENSRNOG00000050318	Fsd1	-76.5
NONRATT025772.2	ENSRNOT00000024976	ENSRNOG00000018476	Fuom	-82.2
NONRATT023910.2	ENSRNOT00000024976	ENSRNOG00000018476	Fuom	-89.6
NONRATT023587.2	ENSRNOT00000024976	ENSRNOG00000018476	Fuom	-93.4
NONRATT017977.2	ENSRNOT00000024976	ENSRNOG00000018476	Fuom	-87.4
NONRATT014240.2	ENSRNOT00000024976	ENSRNOG00000018476	Fuom	-95.8
NONRATT008688.2	ENSRNOT00000024976	ENSRNOG00000018476	Fuom	-85.7
NONRATT004661.2	ENSRNOT00000024976	ENSRNOG00000018476	Fuom	-89.5
NONRATT001442.2	ENSRNOT00000024976	ENSRNOG00000018476	Fuom	-87.9
NONRATT000606.2	ENSRNOT00000024976	ENSRNOG00000018476	Fuom	-95.8
NONRATT023910.2	ENSRNOT00000006195	ENSRNOG00000004660	Fzd6	-82.8
NONRATT023587.2	ENSRNOT00000006195	ENSRNOG00000004660	Fzd6	-89.5
NONRATT017977.2	ENSRNOT00000006195	ENSRNOG00000004660	Fzd6	-80.7
NONRATT014240.2	ENSRNOT00000006195	ENSRNOG00000004660	Fzd6	-88.9
NONRATT008688.2	ENSRNOT00000006195	ENSRNOG00000004660	Fzd6	-82.7
NONRATT004661.2	ENSRNOT00000006195	ENSRNOG00000004660	Fzd6	-87.5
NONRATT001442.2	ENSRNOT00000006195	ENSRNOG00000004660	Fzd6	-80.6
NONRATT000606.2	ENSRNOT00000006195	ENSRNOG00000004660	Fzd6	-89.6
NONRATT028716.2	ENSRNOT00000009221	ENSRNOG00000007023	Galm	-96.6
NONRATT026181.2	ENSRNOT00000009221	ENSRNOG00000007023	Galm	-90
NONRATT021076.2	ENSRNOT00000009221	ENSRNOG00000007023	Galm	-93.5
NONRATT018825.2	ENSRNOT00000009221	ENSRNOG00000007023	Galm	-87.5
NONRATT017960.2	ENSRNOT00000009221	ENSRNOG00000007023	Galm	-95.2
NONRATT014517.2	ENSRNOT00000009221	ENSRNOG00000007023	Galm	-95.4
NONRATT013372.2	ENSRNOT00000009221	ENSRNOG00000007023	Galm	-89.4
NONRATT012710.2	ENSRNOT00000009221	ENSRNOG00000007023	Galm	-89.3
NONRATT011845.2	ENSRNOT00000009221	ENSRNOG00000007023	Galm	-88.3
NONRATT006496.2	ENSRNOT00000009221	ENSRNOG00000007023	Galm	-91.9
NONRATT005891.2	ENSRNOT00000009221	ENSRNOG00000007023	Galm	-93.2
NONRATT001051.2	ENSRNOT00000009221	ENSRNOG00000007023	Galm	-96.6
ENSRNOT00000089552	ENSRNOT00000009221	ENSRNOG00000007023	Galm	-91.9
ENSRNOT00000089288	ENSRNOT00000009221	ENSRNOG00000007023	Galm	-79.7
NONRATT030282.2	ENSRNOT00000079641	ENSRNOG00000014461	Galns	-81.5
NONRATT027796.2	ENSRNOT00000079641	ENSRNOG00000014461	Galns	-84.1
NONRATT025772.2	ENSRNOT00000079641	ENSRNOG00000014461	Galns	-77.5
NONRATT023910.2	ENSRNOT00000079641	ENSRNOG00000014461	Galns	-84.2
NONRATT023587.2	ENSRNOT00000079641	ENSRNOG00000014461	Galns	-88
NONRATT021570.2	ENSRNOT00000079641	ENSRNOG00000014461	Galns	-80.5
NONRATT017977.2	ENSRNOT00000079641	ENSRNOG00000014461	Galns	-83.7
NONRATT014240.2	ENSRNOT00000079641	ENSRNOG00000014461	Galns	-88.7
NONRATT008688.2	ENSRNOT00000079641	ENSRNOG00000014461	Galns	-81.6
NONRATT004661.2	ENSRNOT00000079641	ENSRNOG00000014461	Galns	-86.1
NONRATT001442.2	ENSRNOT00000079641	ENSRNOG00000014461	Galns	-85.8
NONRATT000606.2	ENSRNOT00000079641	ENSRNOG00000014461	Galns	-88.7
NONRATT028716.2	ENSRNOT00000084707	ENSRNOG00000012037	Galnt7	-86.2
NONRATT026181.2	ENSRNOT00000084707	ENSRNOG00000012037	Galnt7	-88.9
NONRATT018825.2	ENSRNOT00000084707	ENSRNOG00000012037	Galnt7	-85.6
NONRATT017960.2	ENSRNOT00000084707	ENSRNOG00000012037	Galnt7	-87.1
NONRATT014517.2	ENSRNOT00000084707	ENSRNOG00000012037	Galnt7	-85.1
NONRATT013372.2	ENSRNOT00000084707	ENSRNOG00000012037	Galnt7	-88.3
NONRATT012710.2	ENSRNOT00000084707	ENSRNOG00000012037	Galnt7	-87.9
NONRATT011845.2	ENSRNOT00000084707	ENSRNOG00000012037	Galnt7	-88.3
NONRATT006496.2	ENSRNOT00000084707	ENSRNOG00000012037	Galnt7	-90
NONRATT005891.2	ENSRNOT00000084707	ENSRNOG00000012037	Galnt7	-84.2
NONRATT001051.2	ENSRNOT00000084707	ENSRNOG00000012037	Galnt7	-85.3
ENSRNOT00000089552	ENSRNOT00000084707	ENSRNOG00000012037	Galnt7	-90
ENSRNOT00000089288	ENSRNOT00000084707	ENSRNOG00000012037	Galnt7	-79.7
NONRATT028716.2	ENSRNOT00000001536	ENSRNOG00000001161	Gatc	-86.2
NONRATT027796.2	ENSRNOT00000001536	ENSRNOG00000001161	Gatc	-80.7
NONRATT026181.2	ENSRNOT00000001536	ENSRNOG00000001161	Gatc	-94.9
NONRATT021570.2	ENSRNOT00000001536	ENSRNOG00000001161	Gatc	-74.6
NONRATT021076.2	ENSRNOT00000001536	ENSRNOG00000001161	Gatc	-81.3
NONRATT018825.2	ENSRNOT00000001536	ENSRNOG00000001161	Gatc	-86.6
NONRATT017960.2	ENSRNOT00000001536	ENSRNOG00000001161	Gatc	-86.2
NONRATT014517.2	ENSRNOT00000001536	ENSRNOG00000001161	Gatc	-84.2
NONRATT013372.2	ENSRNOT00000001536	ENSRNOG00000001161	Gatc	-88.5
NONRATT012710.2	ENSRNOT00000001536	ENSRNOG00000001161	Gatc	-88.4
NONRATT011845.2	ENSRNOT00000001536	ENSRNOG00000001161	Gatc	-87.4
NONRATT006496.2	ENSRNOT00000001536	ENSRNOG00000001161	Gatc	-91
NONRATT005891.2	ENSRNOT00000001536	ENSRNOG00000001161	Gatc	-86.3
NONRATT001051.2	ENSRNOT00000001536	ENSRNOG00000001161	Gatc	-84.4
ENSRNOT00000089552	ENSRNOT00000001536	ENSRNOG00000001161	Gatc	-91
ENSRNOT00000089288	ENSRNOT00000001536	ENSRNOG00000001161	Gatc	-78.8
NONRATT028716.2	ENSRNOT00000078383	ENSRNOG00000055408	Gcat	-96.6
NONRATT026181.2	ENSRNOT00000078383	ENSRNOG00000055408	Gcat	-90
NONRATT021076.2	ENSRNOT00000078383	ENSRNOG00000055408	Gcat	-93.5
NONRATT018825.2	ENSRNOT00000078383	ENSRNOG00000055408	Gcat	-87.5
NONRATT017960.2	ENSRNOT00000078383	ENSRNOG00000055408	Gcat	-95.2
NONRATT014517.2	ENSRNOT00000078383	ENSRNOG00000055408	Gcat	-95.4
NONRATT013372.2	ENSRNOT00000078383	ENSRNOG00000055408	Gcat	-89.4
NONRATT012710.2	ENSRNOT00000078383	ENSRNOG00000055408	Gcat	-89.3
NONRATT011845.2	ENSRNOT00000078383	ENSRNOG00000055408	Gcat	-88.3
NONRATT006496.2	ENSRNOT00000078383	ENSRNOG00000055408	Gcat	-91.9
NONRATT005891.2	ENSRNOT00000078383	ENSRNOG00000055408	Gcat	-93.2
NONRATT001051.2	ENSRNOT00000078383	ENSRNOG00000055408	Gcat	-96.6
ENSRNOT00000089552	ENSRNOT00000078383	ENSRNOG00000055408	Gcat	-91.9
ENSRNOT00000089288	ENSRNOT00000078383	ENSRNOG00000055408	Gcat	-79.7
NONRATT025772.2	ENSRNOT00000037739	ENSRNOG00000027332	Gemin6	-85.7
NONRATT023910.2	ENSRNOT00000037739	ENSRNOG00000027332	Gemin6	-93.8
NONRATT023587.2	ENSRNOT00000037739	ENSRNOG00000027332	Gemin6	-86.3
NONRATT017977.2	ENSRNOT00000037739	ENSRNOG00000027332	Gemin6	-91.6
NONRATT014240.2	ENSRNOT00000037739	ENSRNOG00000027332	Gemin6	-88.7
NONRATT008688.2	ENSRNOT00000037739	ENSRNOG00000027332	Gemin6	-89.9
NONRATT004661.2	ENSRNOT00000037739	ENSRNOG00000027332	Gemin6	-84.3
NONRATT000606.2	ENSRNOT00000037739	ENSRNOG00000027332	Gemin6	-88.7
NONRATT029310.2	ENSRNOT00000080101	ENSRNOG00000016767	Ggps1	-80
NONRATT029310.2	ENSRNOT00000022483	ENSRNOG00000016767	Ggps1	-80
NONRATT024782.2	ENSRNOT00000090387	ENSRNOG00000016767	Ggps1	-84.5
NONRATT024782.2	ENSRNOT00000022483	ENSRNOG00000016767	Ggps1	-84.5
NONRATT024782.2	ENSRNOT00000080101	ENSRNOG00000016767	Ggps1	-84.5
NONRATT022043.2	ENSRNOT00000090387	ENSRNOG00000016767	Ggps1	-76.7
NONRATT021770.2	ENSRNOT00000080101	ENSRNOG00000016767	Ggps1	-71.5
NONRATT021770.2	ENSRNOT00000022483	ENSRNOG00000016767	Ggps1	-71.5
NONRATT021035.2	ENSRNOT00000080101	ENSRNOG00000016767	Ggps1	-73.4
NONRATT021035.2	ENSRNOT00000090387	ENSRNOG00000016767	Ggps1	-73.4
NONRATT021035.2	ENSRNOT00000022483	ENSRNOG00000016767	Ggps1	-73.4
ENSRNOT00000089552	ENSRNOT00000022483	ENSRNOG00000016767	Ggps1	-77.2
ENSRNOT00000089552	ENSRNOT00000080101	ENSRNOG00000016767	Ggps1	-77.2
ENSRNOT00000089288	ENSRNOT00000080101	ENSRNOG00000016767	Ggps1	-79.6
ENSRNOT00000089288	ENSRNOT00000090387	ENSRNOG00000016767	Ggps1	-79.6
ENSRNOT00000089288	ENSRNOT00000022483	ENSRNOG00000016767	Ggps1	-79.6
NONRATT027796.2	ENSRNOT00000032802	ENSRNOG00000024569	Gimap9	-81.8
NONRATT021570.2	ENSRNOT00000032802	ENSRNOG00000024569	Gimap9	-81.1
NONRATT010218.2	ENSRNOT00000032802	ENSRNOG00000024569	Gimap9	-76
NONRATT029310.2	ENSRNOT00000087355	ENSRNOG00000011962	Gin1	-73.4
NONRATT024782.2	ENSRNOT00000087355	ENSRNOG00000011962	Gin1	-74.7
ENSRNOT00000089288	ENSRNOT00000087355	ENSRNOG00000011962	Gin1	-73
NONRATT030282.2	ENSRNOT00000023709	ENSRNOG00000017575	Gins2	-80.3
NONRATT027796.2	ENSRNOT00000023709	ENSRNOG00000017575	Gins2	-82.6
NONRATT025772.2	ENSRNOT00000023709	ENSRNOG00000017575	Gins2	-88.8
NONRATT023910.2	ENSRNOT00000023709	ENSRNOG00000017575	Gins2	-83.9
NONRATT023587.2	ENSRNOT00000023709	ENSRNOG00000017575	Gins2	-85.7
NONRATT021570.2	ENSRNOT00000023709	ENSRNOG00000017575	Gins2	-82.5
NONRATT017977.2	ENSRNOT00000023709	ENSRNOG00000017575	Gins2	-81.4
NONRATT017510.2	ENSRNOT00000023709	ENSRNOG00000017575	Gins2	-77.5
NONRATT014240.2	ENSRNOT00000023709	ENSRNOG00000017575	Gins2	-79.7
NONRATT008688.2	ENSRNOT00000023709	ENSRNOG00000017575	Gins2	-85.8
NONRATT004661.2	ENSRNOT00000023709	ENSRNOG00000017575	Gins2	-83.9
NONRATT000606.2	ENSRNOT00000023709	ENSRNOG00000017575	Gins2	-79.7
NONRATT030282.2	ENSRNOT00000025570	ENSRNOG00000018668	Glg1	-78.6
NONRATT027796.2	ENSRNOT00000025570	ENSRNOG00000018668	Glg1	-88.2
NONRATT021570.2	ENSRNOT00000025570	ENSRNOG00000018668	Glg1	-84.3
NONRATT017510.2	ENSRNOT00000025570	ENSRNOG00000018668	Glg1	-78.5
NONRATT028716.2	ENSRNOT00000029230	ENSRNOG00000026488	Gltpd2	-95.4
NONRATT027796.2	ENSRNOT00000029230	ENSRNOG00000026488	Gltpd2	-84.1
NONRATT026181.2	ENSRNOT00000029230	ENSRNOG00000026488	Gltpd2	-89
NONRATT021570.2	ENSRNOT00000029230	ENSRNOG00000026488	Gltpd2	-84.1
NONRATT021076.2	ENSRNOT00000029230	ENSRNOG00000026488	Gltpd2	-93.5
NONRATT018825.2	ENSRNOT00000029230	ENSRNOG00000026488	Gltpd2	-86.3
NONRATT017960.2	ENSRNOT00000029230	ENSRNOG00000026488	Gltpd2	-91.5
NONRATT014517.2	ENSRNOT00000029230	ENSRNOG00000026488	Gltpd2	-95.4
NONRATT013372.2	ENSRNOT00000029230	ENSRNOG00000026488	Gltpd2	-87.7
NONRATT012710.2	ENSRNOT00000029230	ENSRNOG00000026488	Gltpd2	-88.1
NONRATT011845.2	ENSRNOT00000029230	ENSRNOG00000026488	Gltpd2	-84.6
NONRATT006496.2	ENSRNOT00000029230	ENSRNOG00000026488	Gltpd2	-90.7
NONRATT005891.2	ENSRNOT00000029230	ENSRNOG00000026488	Gltpd2	-93.2
NONRATT001051.2	ENSRNOT00000029230	ENSRNOG00000026488	Gltpd2	-95.4
ENSRNOT00000089552	ENSRNOT00000029230	ENSRNOG00000026488	Gltpd2	-90.7
ENSRNOT00000089288	ENSRNOT00000029230	ENSRNOG00000026488	Gltpd2	-77.4
NONRATT000414.2	ENSRNOT00000057960	ENSRNOG00000038087	Gm10676	-108.8
NONRATT007757.2	ENSRNOT00000039607	ENSRNOG00000027257	Gmip	-76.3
NONRATT025772.2	ENSRNOT00000067150	ENSRNOG00000020216	Gmpr2	-80.9
NONRATT023910.2	ENSRNOT00000067150	ENSRNOG00000020216	Gmpr2	-87.5
NONRATT023587.2	ENSRNOT00000067150	ENSRNOG00000020216	Gmpr2	-92.6
NONRATT017977.2	ENSRNOT00000067150	ENSRNOG00000020216	Gmpr2	-86.6
NONRATT014240.2	ENSRNOT00000067150	ENSRNOG00000020216	Gmpr2	-95.8
NONRATT008688.2	ENSRNOT00000067150	ENSRNOG00000020216	Gmpr2	-84.9
NONRATT004661.2	ENSRNOT00000067150	ENSRNOG00000020216	Gmpr2	-87.5
NONRATT000606.2	ENSRNOT00000067150	ENSRNOG00000020216	Gmpr2	-95.8
NONRATT007788.2	ENSRNOT00000001654	ENSRNOG00000001235	Gna12	-95.9
NONRATT029310.2	ENSRNOT00000007202	ENSRNOG00000005378	Gna15	-69.2
NONRATT024782.2	ENSRNOT00000007202	ENSRNOG00000005378	Gna15	-71.7
ENSRNOT00000089288	ENSRNOT00000007202	ENSRNOG00000005378	Gna15	-67.8
NONRATT028716.2	ENSRNOT00000070807	ENSRNOG00000047080	Gng4	-96.6
NONRATT026181.2	ENSRNOT00000070807	ENSRNOG00000047080	Gng4	-90
NONRATT021076.2	ENSRNOT00000070807	ENSRNOG00000047080	Gng4	-93.5
NONRATT018825.2	ENSRNOT00000070807	ENSRNOG00000047080	Gng4	-87.5
NONRATT017960.2	ENSRNOT00000070807	ENSRNOG00000047080	Gng4	-95.2
NONRATT014517.2	ENSRNOT00000070807	ENSRNOG00000047080	Gng4	-95.4
NONRATT013372.2	ENSRNOT00000070807	ENSRNOG00000047080	Gng4	-89.4
NONRATT012710.2	ENSRNOT00000070807	ENSRNOG00000047080	Gng4	-89.3
NONRATT011845.2	ENSRNOT00000070807	ENSRNOG00000047080	Gng4	-88.3
NONRATT006496.2	ENSRNOT00000070807	ENSRNOG00000047080	Gng4	-91.9
NONRATT005891.2	ENSRNOT00000070807	ENSRNOG00000047080	Gng4	-93.2
NONRATT001051.2	ENSRNOT00000070807	ENSRNOG00000047080	Gng4	-96.6
ENSRNOT00000089552	ENSRNOT00000070807	ENSRNOG00000047080	Gng4	-91.9
ENSRNOT00000089288	ENSRNOT00000070807	ENSRNOG00000047080	Gng4	-79.7
NONRATT028716.2	ENSRNOT00000003397	ENSRNOG00000002509	Gnl3l	-87.7
NONRATT026181.2	ENSRNOT00000003397	ENSRNOG00000002509	Gnl3l	-92.4
NONRATT018825.2	ENSRNOT00000003397	ENSRNOG00000002509	Gnl3l	-89.9
NONRATT017960.2	ENSRNOT00000003397	ENSRNOG00000002509	Gnl3l	-86
NONRATT014517.2	ENSRNOT00000003397	ENSRNOG00000002509	Gnl3l	-86.5
NONRATT013372.2	ENSRNOT00000003397	ENSRNOG00000002509	Gnl3l	-91.5
NONRATT012710.2	ENSRNOT00000003397	ENSRNOG00000002509	Gnl3l	-91.7
NONRATT011845.2	ENSRNOT00000003397	ENSRNOG00000002509	Gnl3l	-90.1
NONRATT006496.2	ENSRNOT00000003397	ENSRNOG00000002509	Gnl3l	-94.3
NONRATT001051.2	ENSRNOT00000003397	ENSRNOG00000002509	Gnl3l	-87.7
NONRATT026641.2	ENSRNOT00000006946	ENSRNOG00000005228	Gnptab	-98.1
NONRATT028716.2	ENSRNOT00000002755	ENSRNOG00000002011	Gnrhr	-84
NONRATT026181.2	ENSRNOT00000002755	ENSRNOG00000002011	Gnrhr	-88.7
NONRATT018825.2	ENSRNOT00000002755	ENSRNOG00000002011	Gnrhr	-81
NONRATT017960.2	ENSRNOT00000002755	ENSRNOG00000002011	Gnrhr	-84
NONRATT014517.2	ENSRNOT00000002755	ENSRNOG00000002011	Gnrhr	-82
NONRATT013372.2	ENSRNOT00000002755	ENSRNOG00000002011	Gnrhr	-90.6
NONRATT012710.2	ENSRNOT00000002755	ENSRNOG00000002011	Gnrhr	-90.6
NONRATT011845.2	ENSRNOT00000002755	ENSRNOG00000002011	Gnrhr	-90.6
NONRATT006496.2	ENSRNOT00000002755	ENSRNOG00000002011	Gnrhr	-85.4
NONRATT005891.2	ENSRNOT00000002755	ENSRNOG00000002011	Gnrhr	-82
NONRATT001051.2	ENSRNOT00000002755	ENSRNOG00000002011	Gnrhr	-83.6
NONRATT025772.2	ENSRNOT00000019703	ENSRNOG00000014493	Golga1	-80.9
NONRATT023910.2	ENSRNOT00000019703	ENSRNOG00000014493	Golga1	-87.5
NONRATT023587.2	ENSRNOT00000019703	ENSRNOG00000014493	Golga1	-92.6
NONRATT017977.2	ENSRNOT00000019703	ENSRNOG00000014493	Golga1	-86.6
NONRATT014240.2	ENSRNOT00000019703	ENSRNOG00000014493	Golga1	-95.8
NONRATT008688.2	ENSRNOT00000019703	ENSRNOG00000014493	Golga1	-84.9
NONRATT004661.2	ENSRNOT00000019703	ENSRNOG00000014493	Golga1	-87.5
NONRATT001442.2	ENSRNOT00000019703	ENSRNOG00000014493	Golga1	-87.9
NONRATT000606.2	ENSRNOT00000019703	ENSRNOG00000014493	Golga1	-95.8
NONRATT028716.2	ENSRNOT00000083069	ENSRNOG00000047620	Golph3l	-76.2
NONRATT026181.2	ENSRNOT00000083069	ENSRNOG00000047620	Golph3l	-84.4
NONRATT026181.2	ENSRNOT00000070919	ENSRNOG00000047620	Golph3l	-84.4
NONRATT017960.2	ENSRNOT00000083069	ENSRNOG00000047620	Golph3l	-75
NONRATT014517.2	ENSRNOT00000083069	ENSRNOG00000047620	Golph3l	-74.2
NONRATT012710.2	ENSRNOT00000083069	ENSRNOG00000047620	Golph3l	-79.3
NONRATT011845.2	ENSRNOT00000083069	ENSRNOG00000047620	Golph3l	-79.3
NONRATT006496.2	ENSRNOT00000070919	ENSRNOG00000047620	Golph3l	-80.9
NONRATT006496.2	ENSRNOT00000083069	ENSRNOG00000047620	Golph3l	-80.9
NONRATT005891.2	ENSRNOT00000083069	ENSRNOG00000047620	Golph3l	-73.8
NONRATT001051.2	ENSRNOT00000083069	ENSRNOG00000047620	Golph3l	-73.9
NONRATT025772.2	ENSRNOT00000013602	ENSRNOG00000010227	Gpatch2l	-90.2
NONRATT023910.2	ENSRNOT00000013602	ENSRNOG00000010227	Gpatch2l	-87.8
NONRATT023587.2	ENSRNOT00000013602	ENSRNOG00000010227	Gpatch2l	-85.7
NONRATT017977.2	ENSRNOT00000013602	ENSRNOG00000010227	Gpatch2l	-86.2
NONRATT014240.2	ENSRNOT00000013602	ENSRNOG00000010227	Gpatch2l	-83.6
NONRATT008688.2	ENSRNOT00000013602	ENSRNOG00000010227	Gpatch2l	-86.8
NONRATT004661.2	ENSRNOT00000013602	ENSRNOG00000010227	Gpatch2l	-83.9
NONRATT000606.2	ENSRNOT00000013602	ENSRNOG00000010227	Gpatch2l	-83.6
NONRATT028716.2	ENSRNOT00000039000	ENSRNOG00000022939	Gpkow	-81.7
NONRATT026181.2	ENSRNOT00000039000	ENSRNOG00000022939	Gpkow	-88.3
NONRATT018825.2	ENSRNOT00000039000	ENSRNOG00000022939	Gpkow	-80
NONRATT017960.2	ENSRNOT00000039000	ENSRNOG00000022939	Gpkow	-81.7
NONRATT014517.2	ENSRNOT00000039000	ENSRNOG00000022939	Gpkow	-79.7
NONRATT013372.2	ENSRNOT00000039000	ENSRNOG00000022939	Gpkow	-81.9
NONRATT012710.2	ENSRNOT00000039000	ENSRNOG00000022939	Gpkow	-81.8
NONRATT011845.2	ENSRNOT00000039000	ENSRNOG00000022939	Gpkow	-81.5
NONRATT006496.2	ENSRNOT00000039000	ENSRNOG00000022939	Gpkow	-84.4
NONRATT005891.2	ENSRNOT00000039000	ENSRNOG00000022939	Gpkow	-82
NONRATT001051.2	ENSRNOT00000039000	ENSRNOG00000022939	Gpkow	-80.8
ENSRNOT00000089552	ENSRNOT00000039000	ENSRNOG00000022939	Gpkow	-84.4
NONRATT025772.2	ENSRNOT00000008282	ENSRNOG00000006237	Gpr37l1	-80.9
NONRATT023910.2	ENSRNOT00000008282	ENSRNOG00000006237	Gpr37l1	-87.5
NONRATT023587.2	ENSRNOT00000008282	ENSRNOG00000006237	Gpr37l1	-92.6
NONRATT017977.2	ENSRNOT00000008282	ENSRNOG00000006237	Gpr37l1	-86.6
NONRATT014240.2	ENSRNOT00000008282	ENSRNOG00000006237	Gpr37l1	-95.8
NONRATT008688.2	ENSRNOT00000008282	ENSRNOG00000006237	Gpr37l1	-84.9
NONRATT004661.2	ENSRNOT00000008282	ENSRNOG00000006237	Gpr37l1	-87.5
NONRATT001442.2	ENSRNOT00000008282	ENSRNOG00000006237	Gpr37l1	-87.9
NONRATT000606.2	ENSRNOT00000008282	ENSRNOG00000006237	Gpr37l1	-95.8
NONRATT017977.2	ENSRNOT00000079063	ENSRNOG00000014615	Grk6	-70
NONRATT008688.2	ENSRNOT00000079063	ENSRNOG00000014615	Grk6	-76.7
NONRATT028716.2	ENSRNOT00000017607	ENSRNOG00000013171	Grm2	-87.4
NONRATT026181.2	ENSRNOT00000017607	ENSRNOG00000013171	Grm2	-92.1
NONRATT018825.2	ENSRNOT00000017607	ENSRNOG00000013171	Grm2	-89.6
NONRATT017960.2	ENSRNOT00000017607	ENSRNOG00000013171	Grm2	-87
NONRATT014517.2	ENSRNOT00000017607	ENSRNOG00000013171	Grm2	-86.2
NONRATT013372.2	ENSRNOT00000017607	ENSRNOG00000013171	Grm2	-91.5
NONRATT012710.2	ENSRNOT00000017607	ENSRNOG00000013171	Grm2	-91.4
NONRATT011845.2	ENSRNOT00000017607	ENSRNOG00000013171	Grm2	-91.4
NONRATT006496.2	ENSRNOT00000017607	ENSRNOG00000013171	Grm2	-94
NONRATT005891.2	ENSRNOT00000017607	ENSRNOG00000013171	Grm2	-85
NONRATT001051.2	ENSRNOT00000017607	ENSRNOG00000013171	Grm2	-87.4
ENSRNOT00000089552	ENSRNOT00000017607	ENSRNOG00000013171	Grm2	-94
ENSRNOT00000089288	ENSRNOT00000017607	ENSRNOG00000013171	Grm2	-80.5
NONRATT030282.2	ENSRNOT00000048349	ENSRNOG00000007943	Gsdma	-77.8
NONRATT027796.2	ENSRNOT00000048349	ENSRNOG00000007943	Gsdma	-88
NONRATT025772.2	ENSRNOT00000048349	ENSRNOG00000007943	Gsdma	-75.9
NONRATT023910.2	ENSRNOT00000048349	ENSRNOG00000007943	Gsdma	-89.4
NONRATT023587.2	ENSRNOT00000048349	ENSRNOG00000007943	Gsdma	-84.9
NONRATT021570.2	ENSRNOT00000048349	ENSRNOG00000007943	Gsdma	-84.3
NONRATT017977.2	ENSRNOT00000048349	ENSRNOG00000007943	Gsdma	-87.1
NONRATT014240.2	ENSRNOT00000048349	ENSRNOG00000007943	Gsdma	-76.5
NONRATT010218.2	ENSRNOT00000048349	ENSRNOG00000007943	Gsdma	-82.3
NONRATT008688.2	ENSRNOT00000048349	ENSRNOG00000007943	Gsdma	-89.4
NONRATT004661.2	ENSRNOT00000048349	ENSRNOG00000007943	Gsdma	-80
NONRATT000606.2	ENSRNOT00000048349	ENSRNOG00000007943	Gsdma	-78.3
NONRATT028716.2	ENSRNOT00000006307	ENSRNOG00000042427	Gskip	-86.5
NONRATT026181.2	ENSRNOT00000006307	ENSRNOG00000042427	Gskip	-90.7
NONRATT018825.2	ENSRNOT00000006307	ENSRNOG00000042427	Gskip	-88.4
[truncated: 3,647 more rows]
